# Supplementary material for: Decoding locomotion from population neural activity in moving C. elegans
Source: eLife journal article supplement (doi:10.7554/elife.66135), 2021-07-29

**a.**  $R^2_{\text{ms, test}} = 0.76$ , mean: 0.55

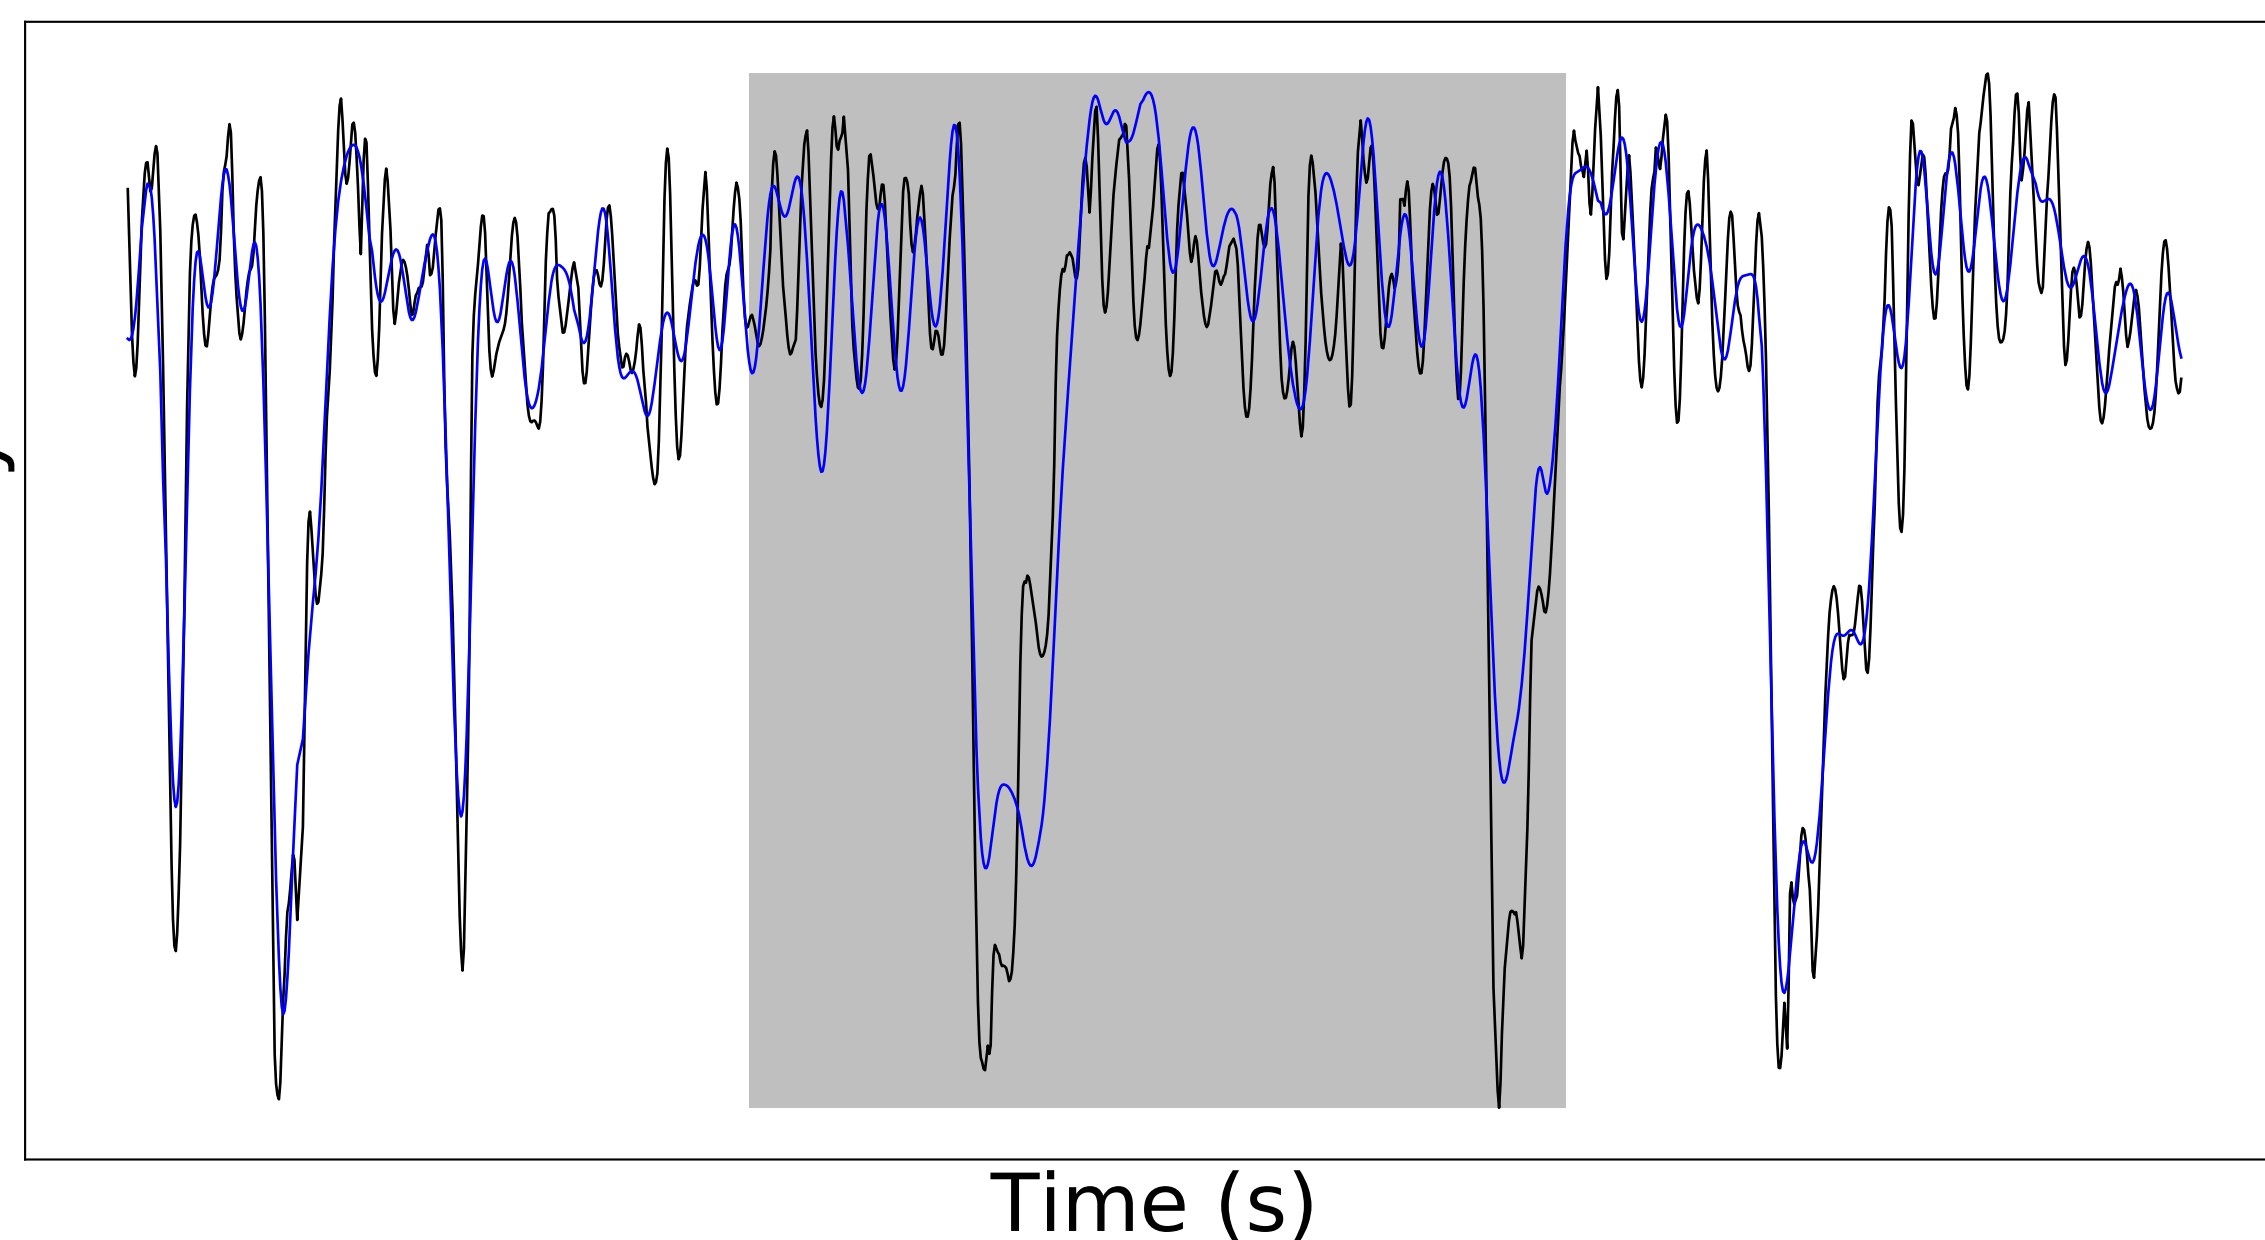

**b.**  $R^2_{\text{ms, test}} = 0.60$ , mean: 0.48

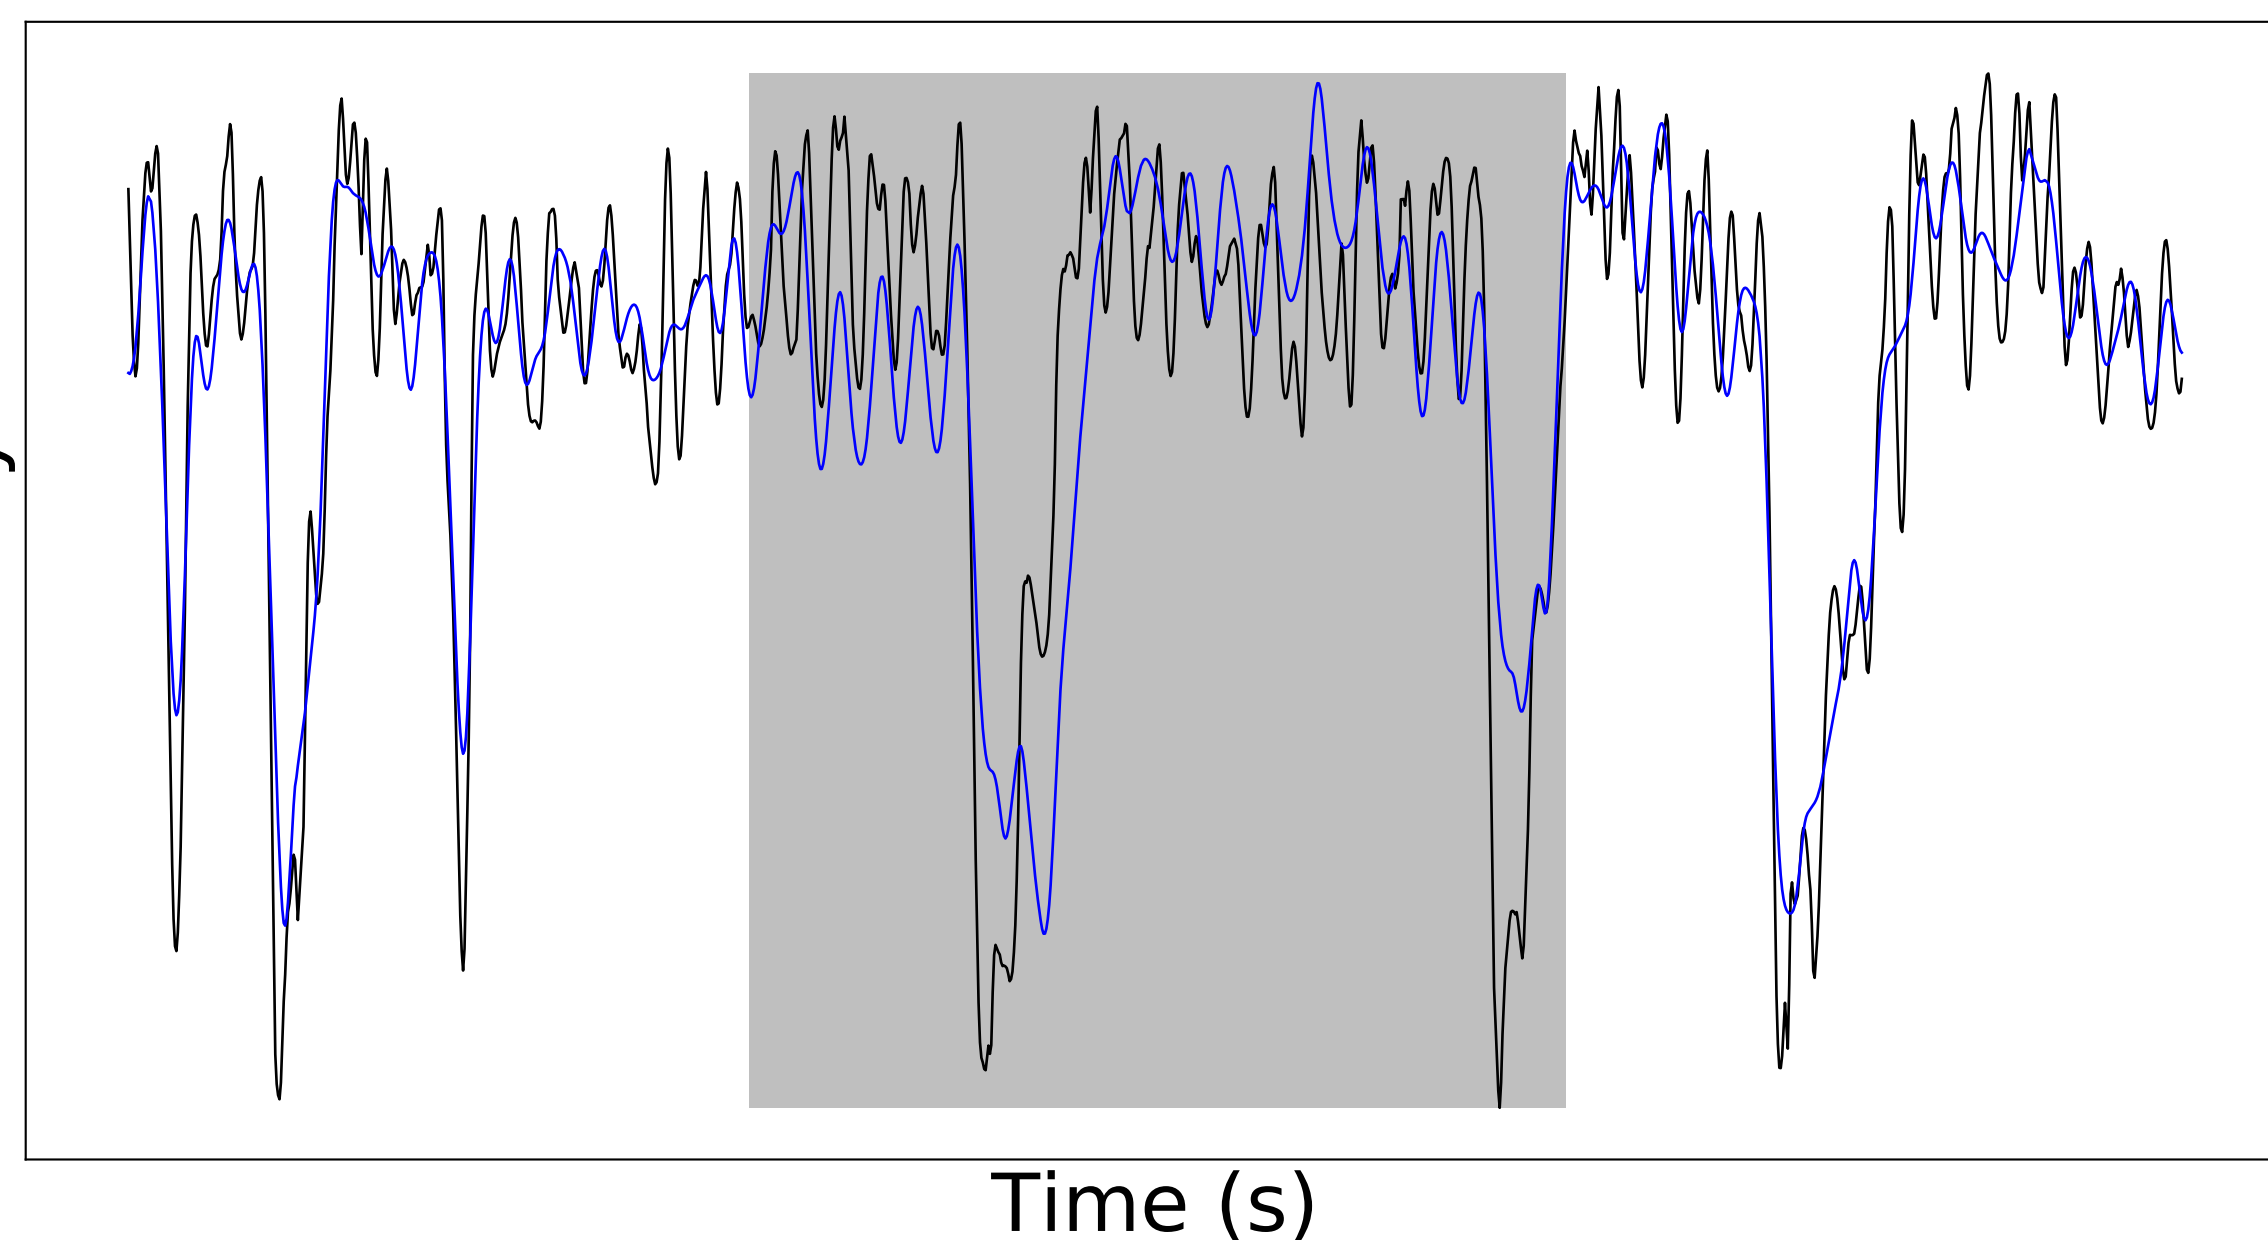

**c.**  $R^2_{\text{ms, test}} = 0.76$ , mean: 0.56

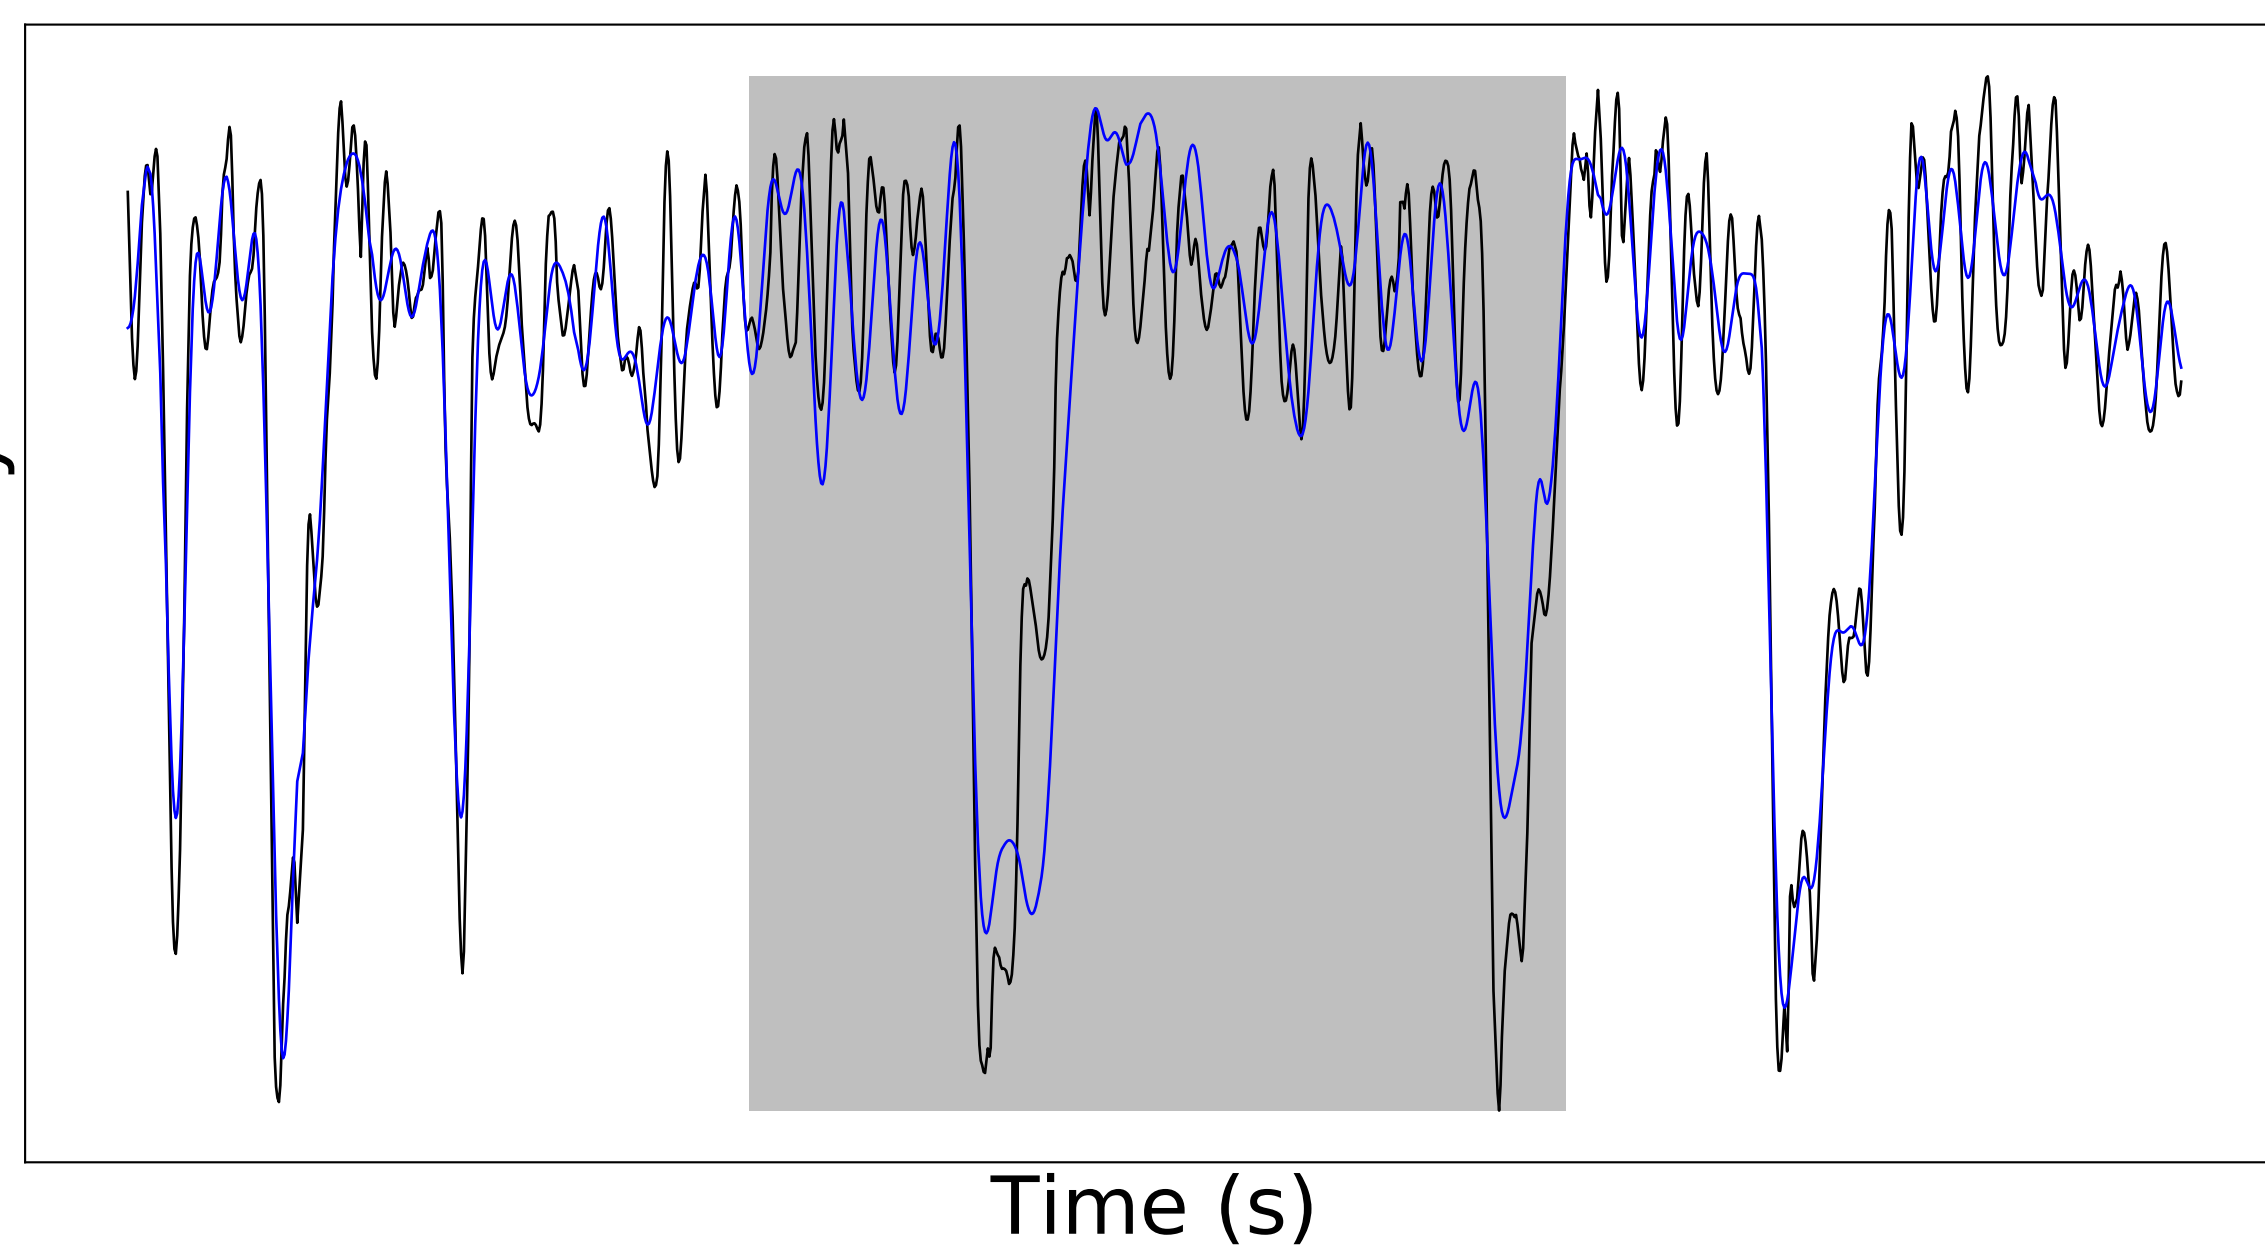

**d.**  $R^2_{\text{ms, test}} = 0.64$ , mean: 0.44

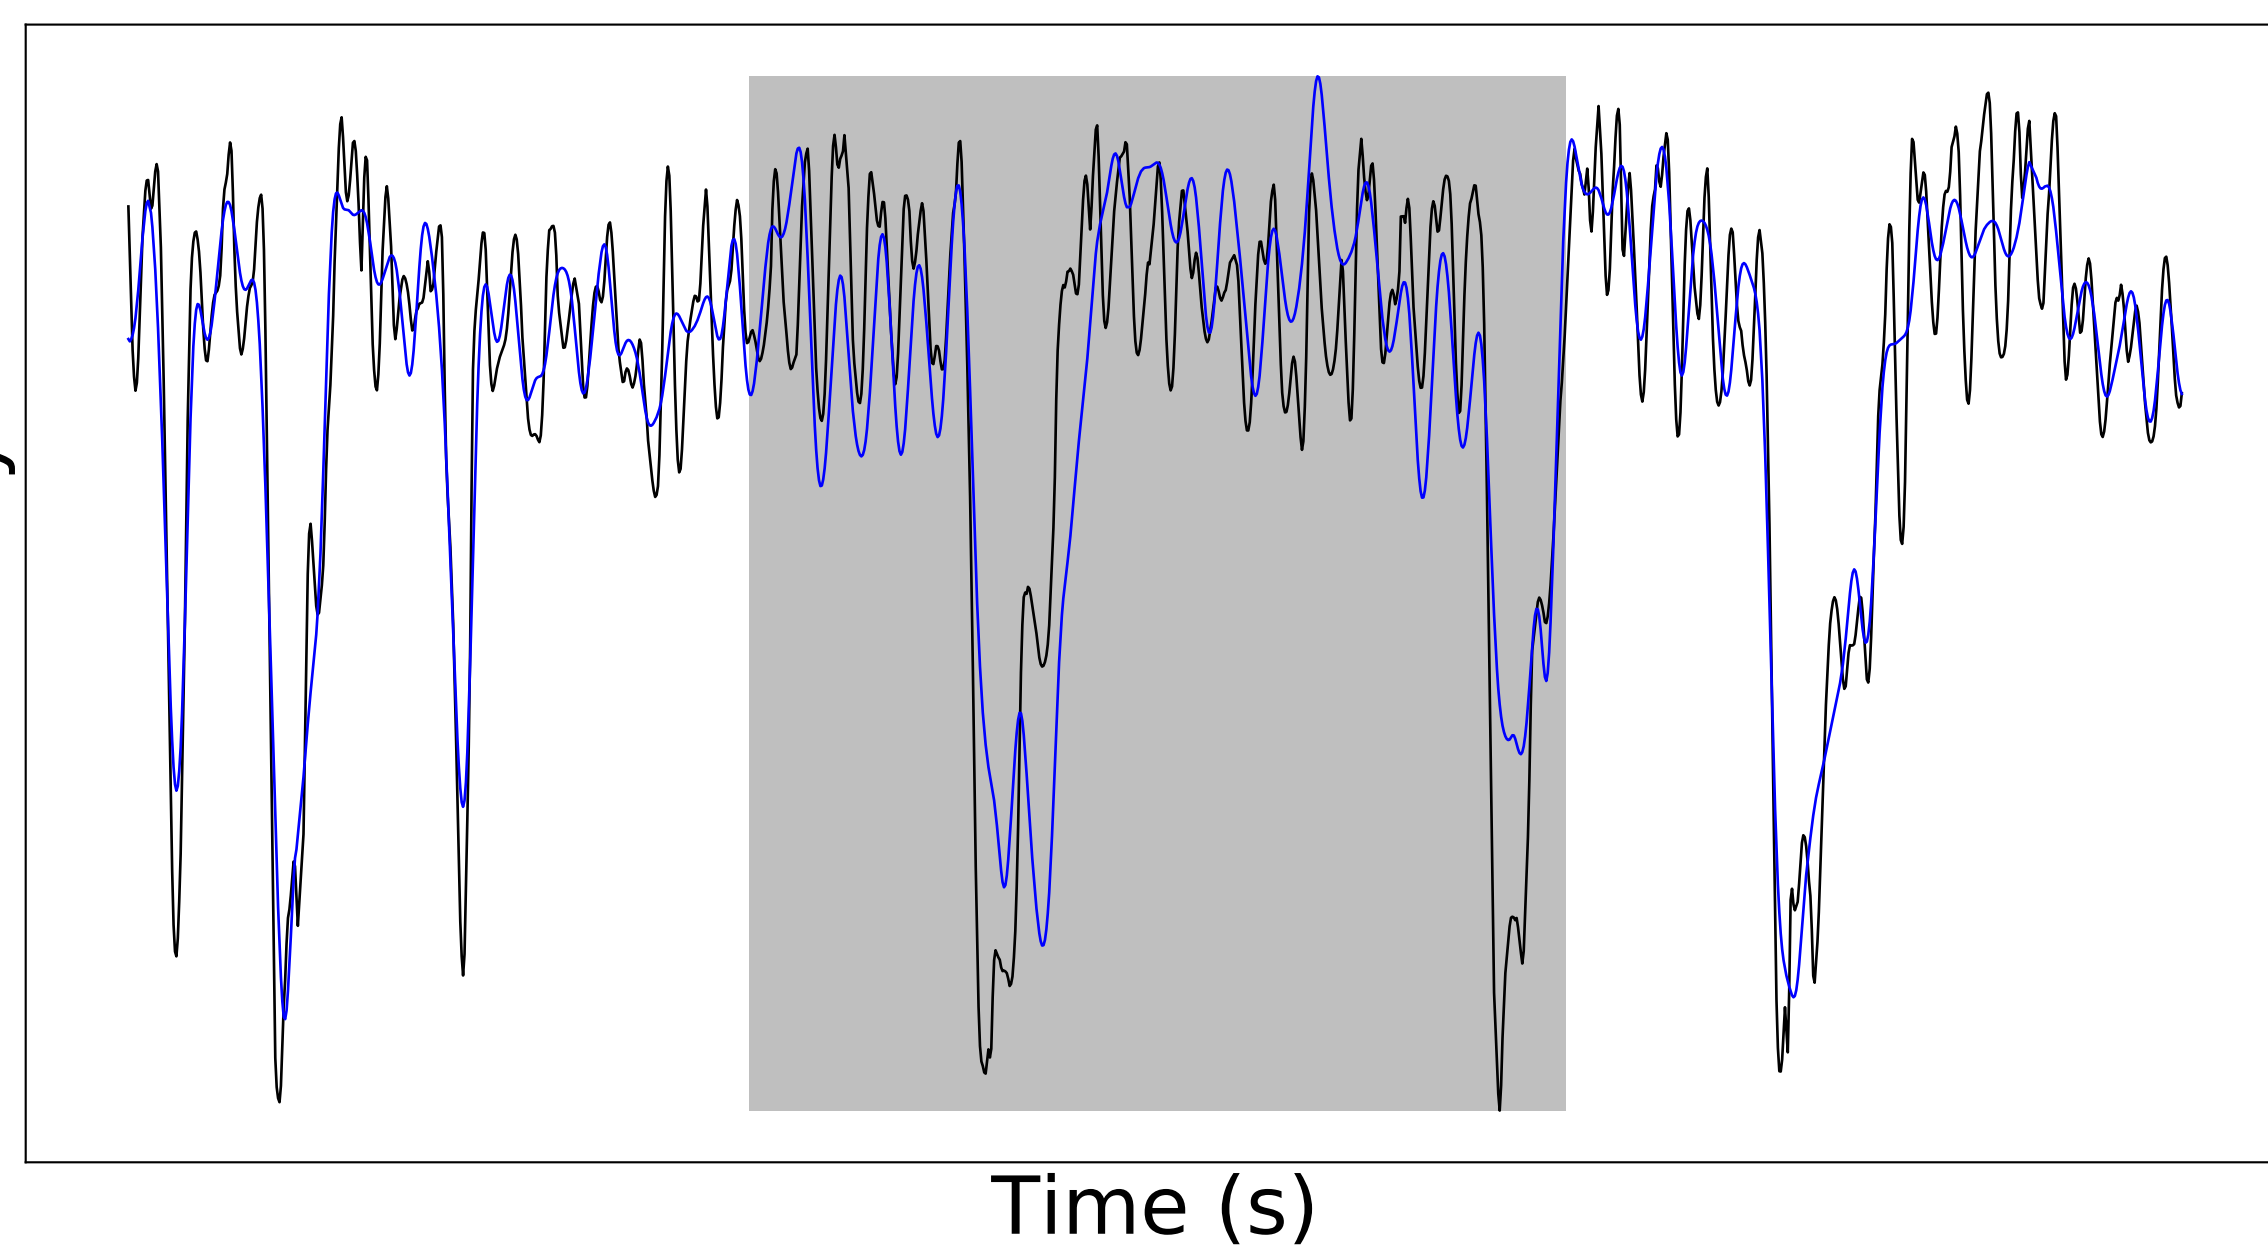

**e.**  $R^2_{\text{ms, test}} = 0.79$ , mean: 0.54

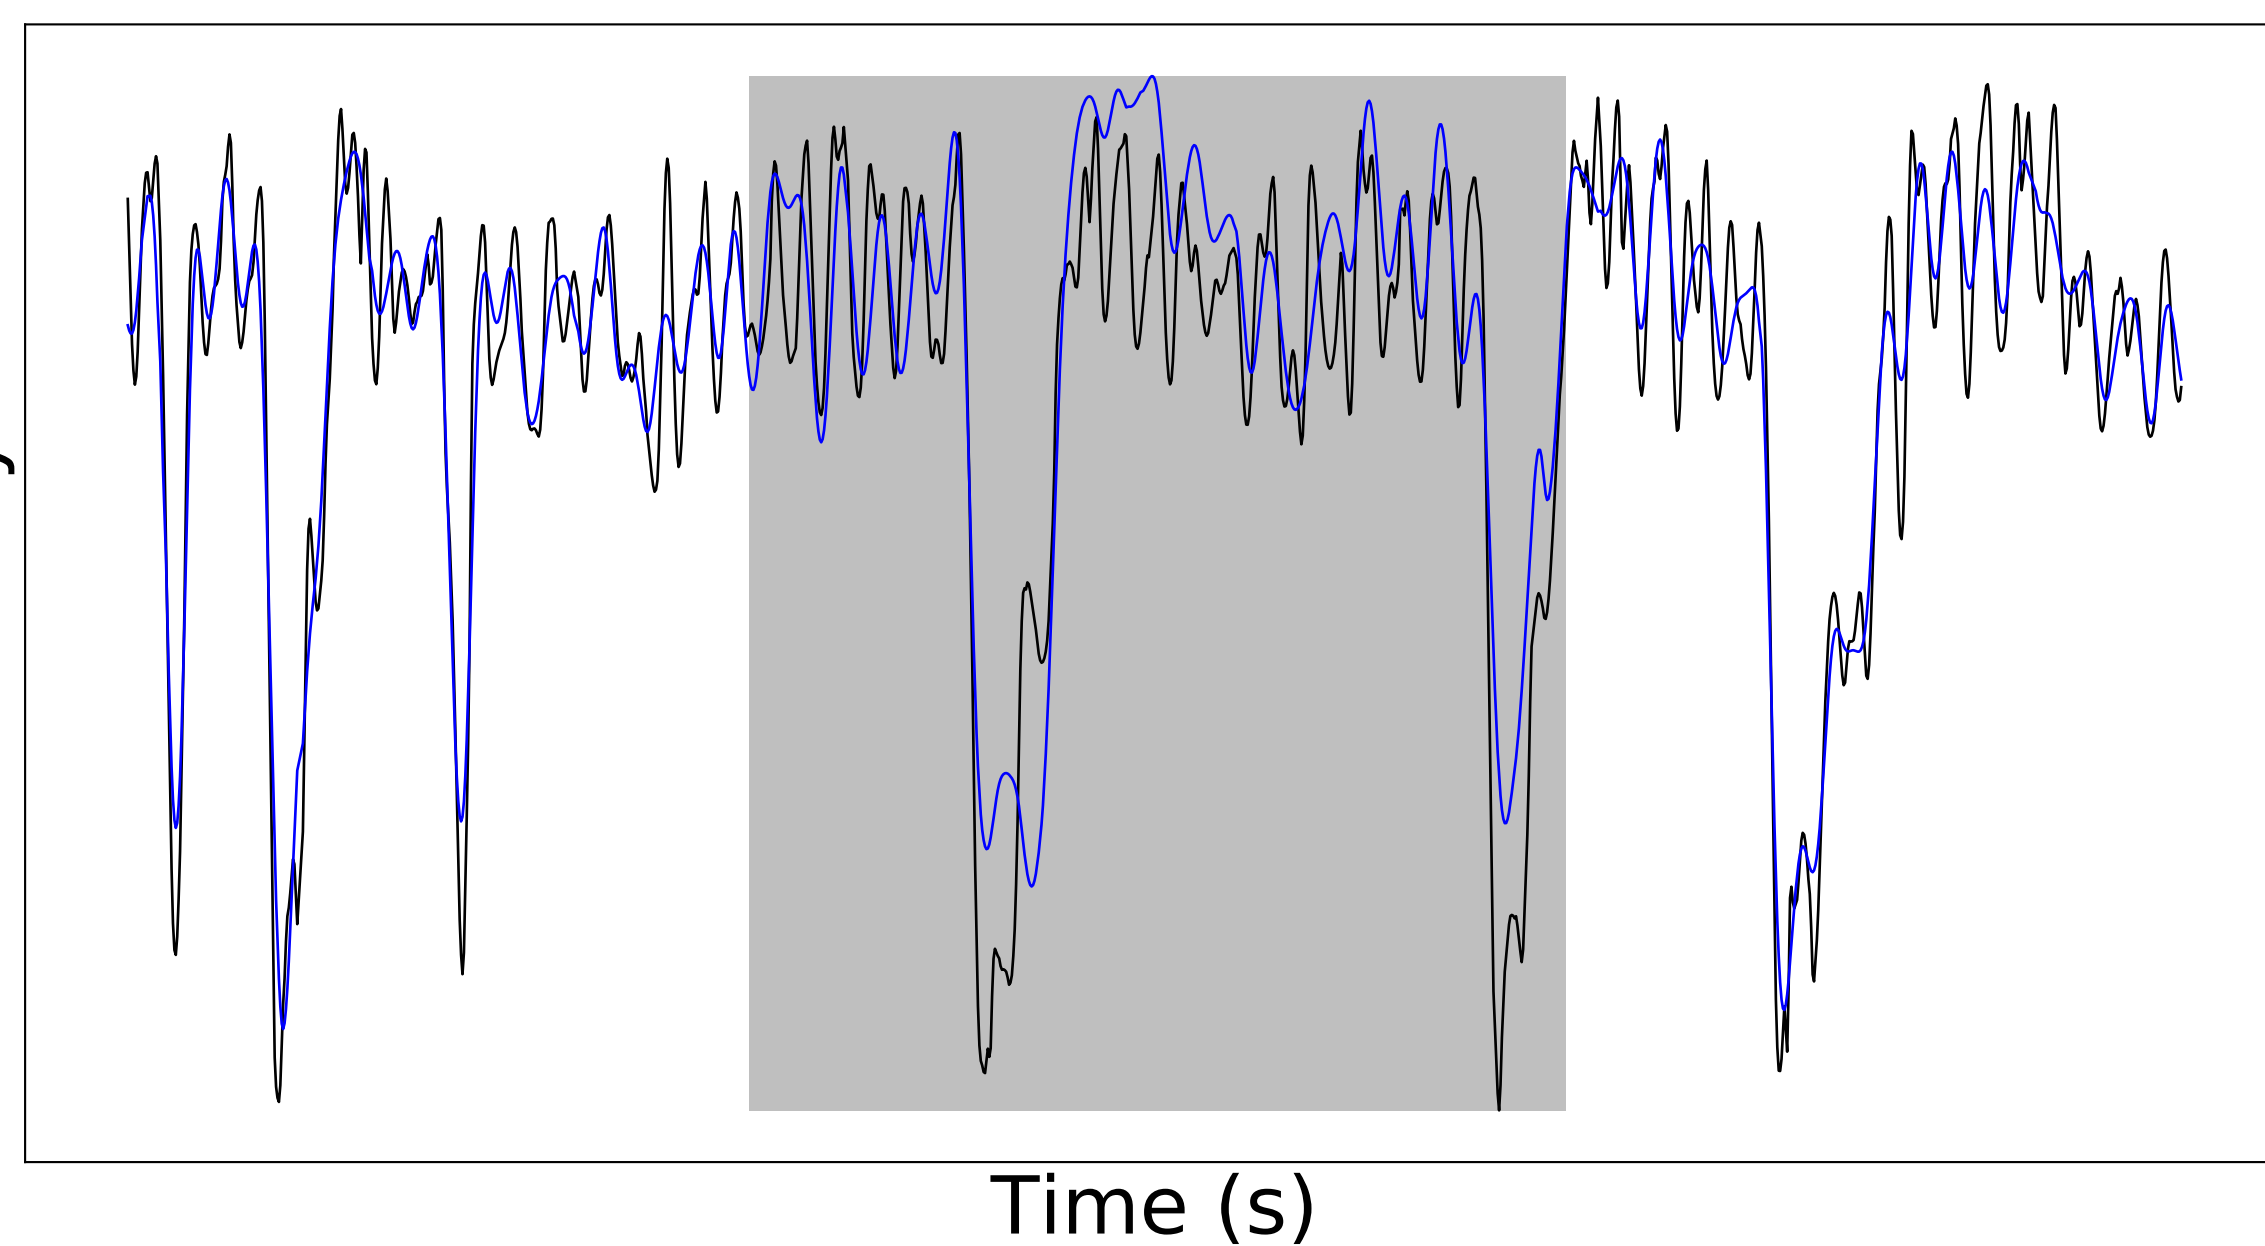

**f.**  $R^2_{\text{ms, test}} = 0.64$ , mean: 0.47

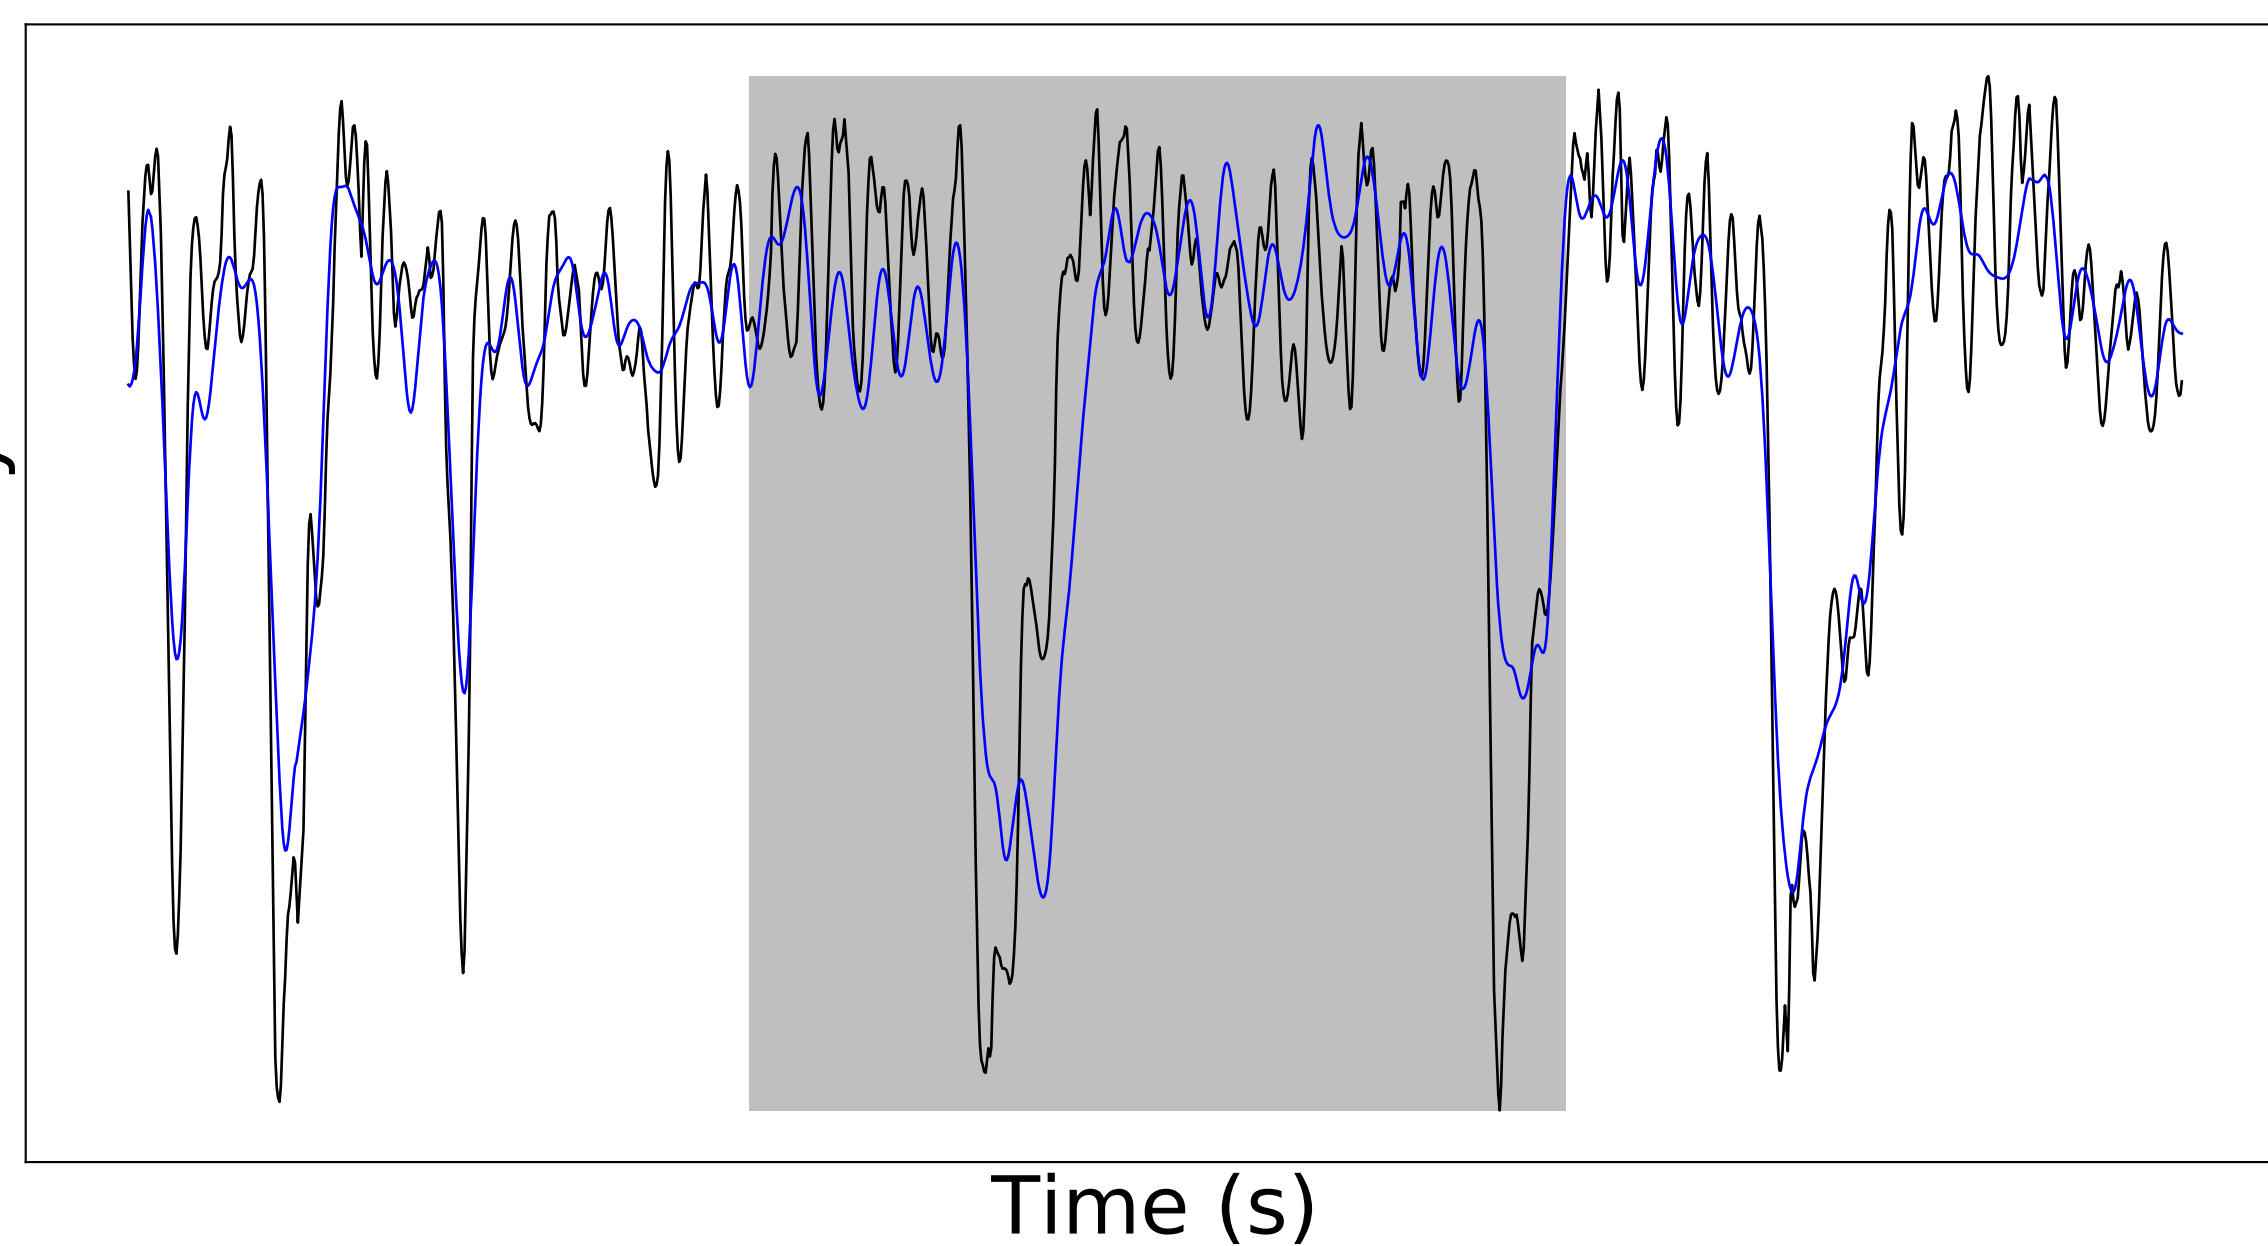

**g.**  $R^2_{\text{ms, test}} = 0.54$ , mean: 0.28

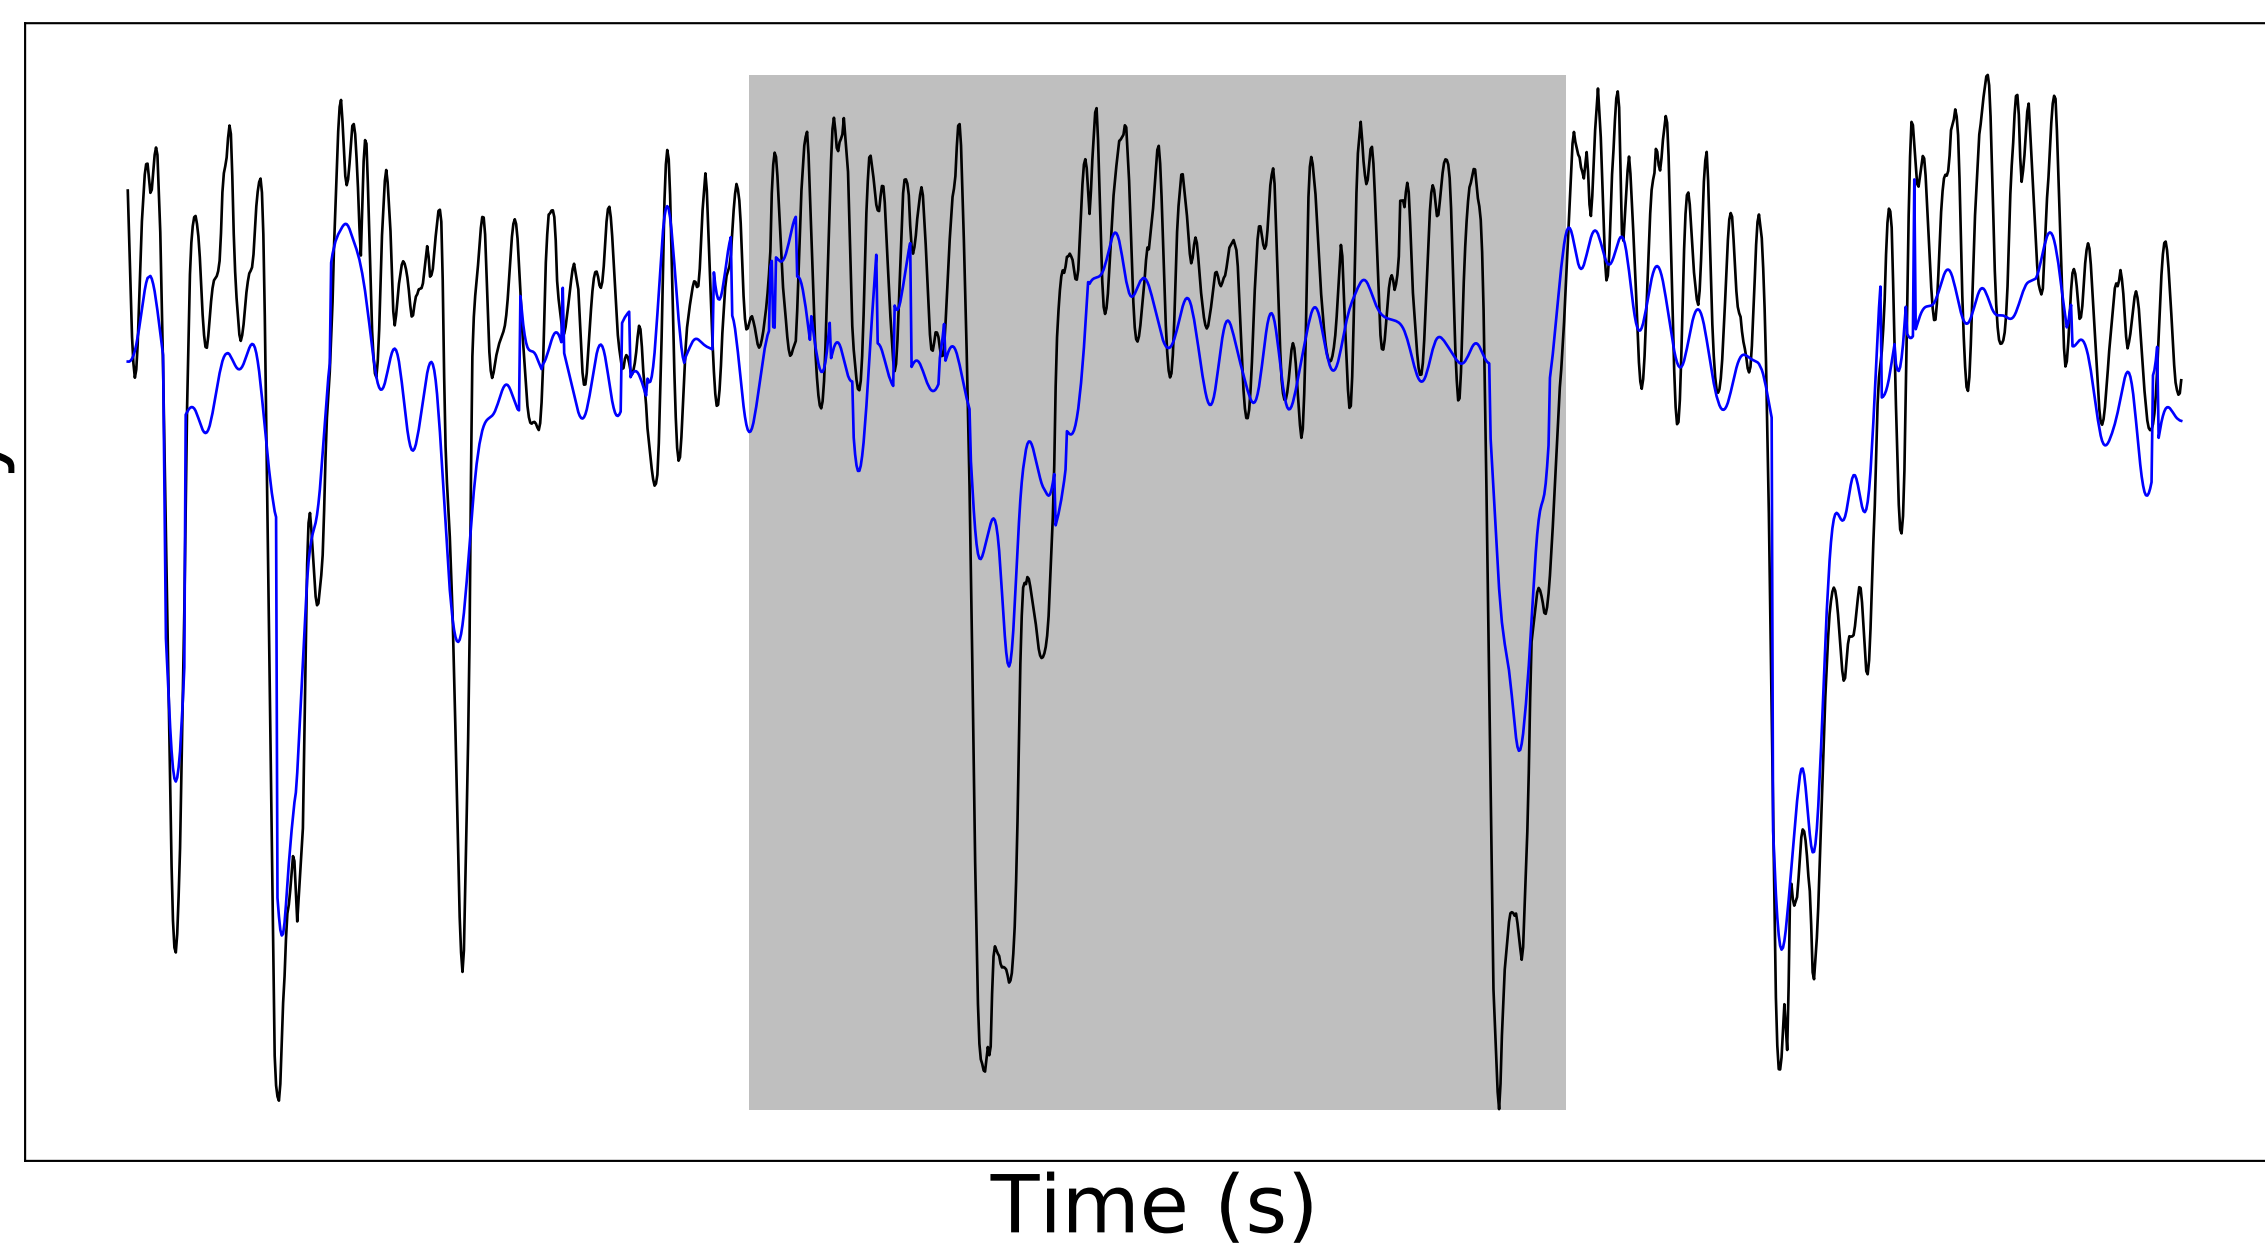

**h.**  $R^2_{\text{ms, test}} = 0.08$ , mean: -0.25

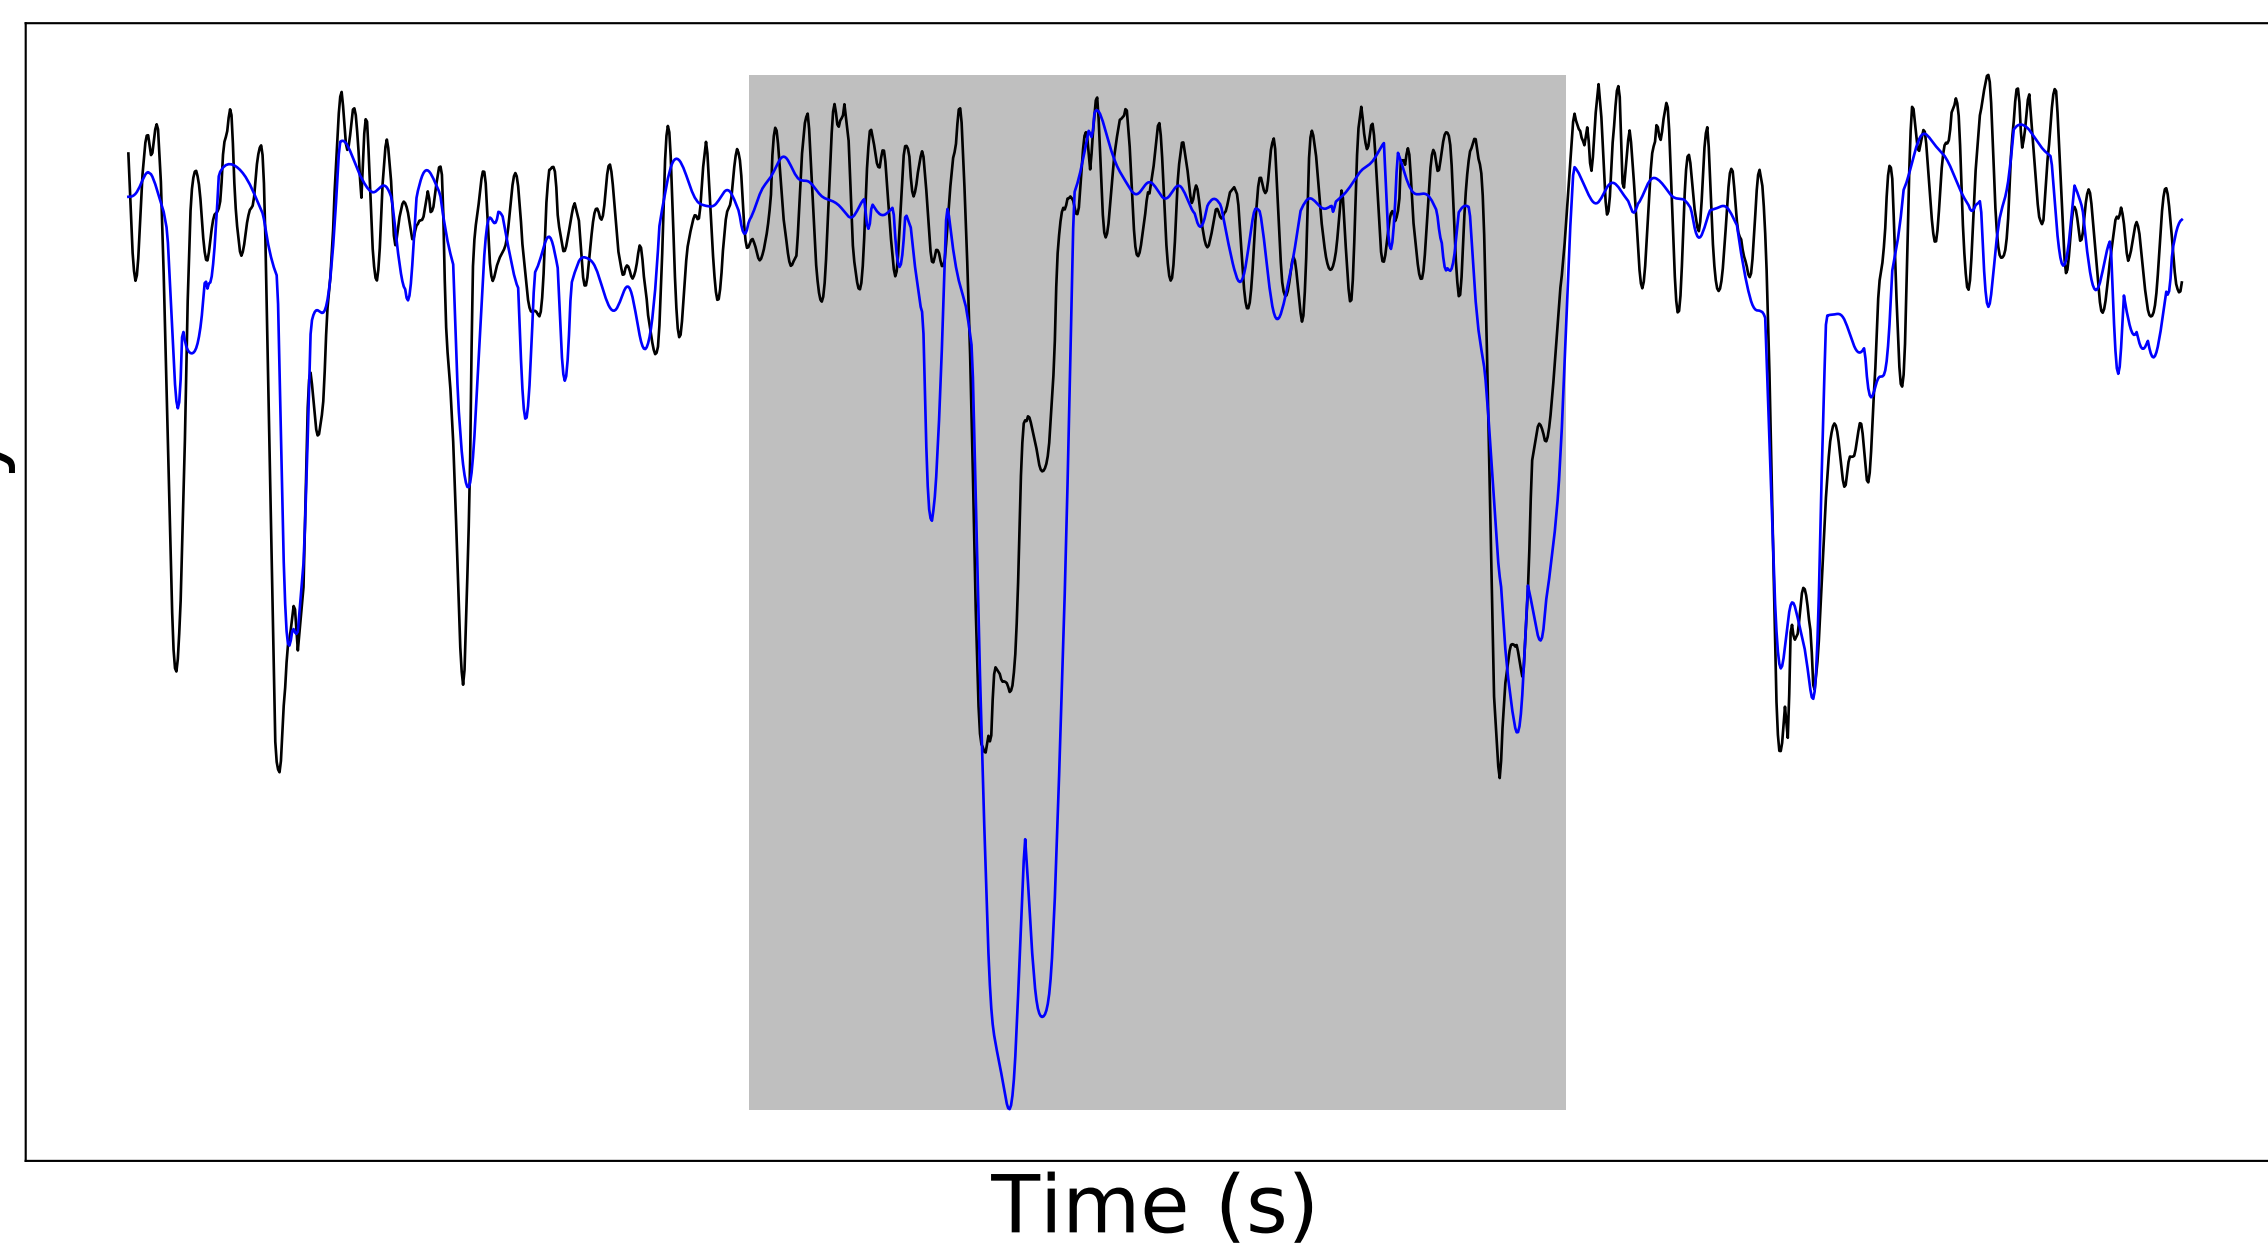

Supplement: supp [file elife-66135-supp-v1.zip]
