# Supplementary figures and images for: Decoding locomotion from population neural activity in moving C. elegans
Source: eLife journal article supplement (doi:10.7554/elife.66135), 2021-07-29

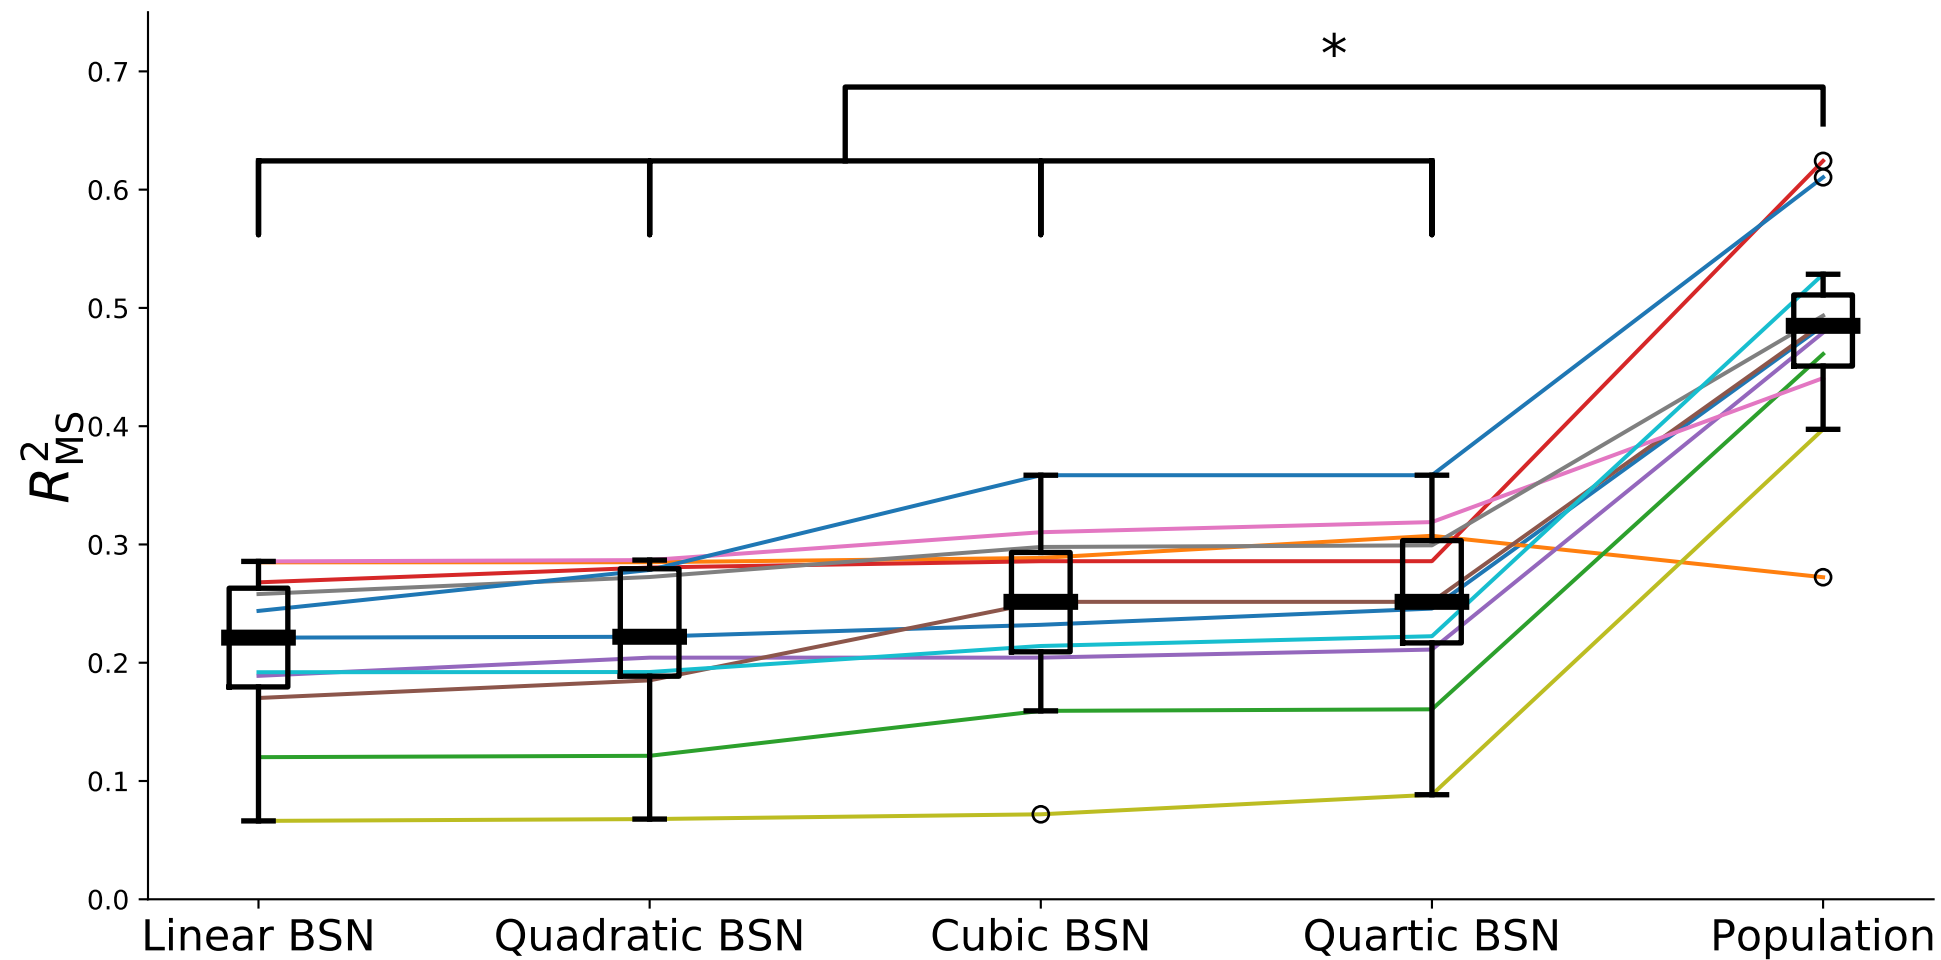

Supplement: supp [file elife-66135-supp-v1.zip]

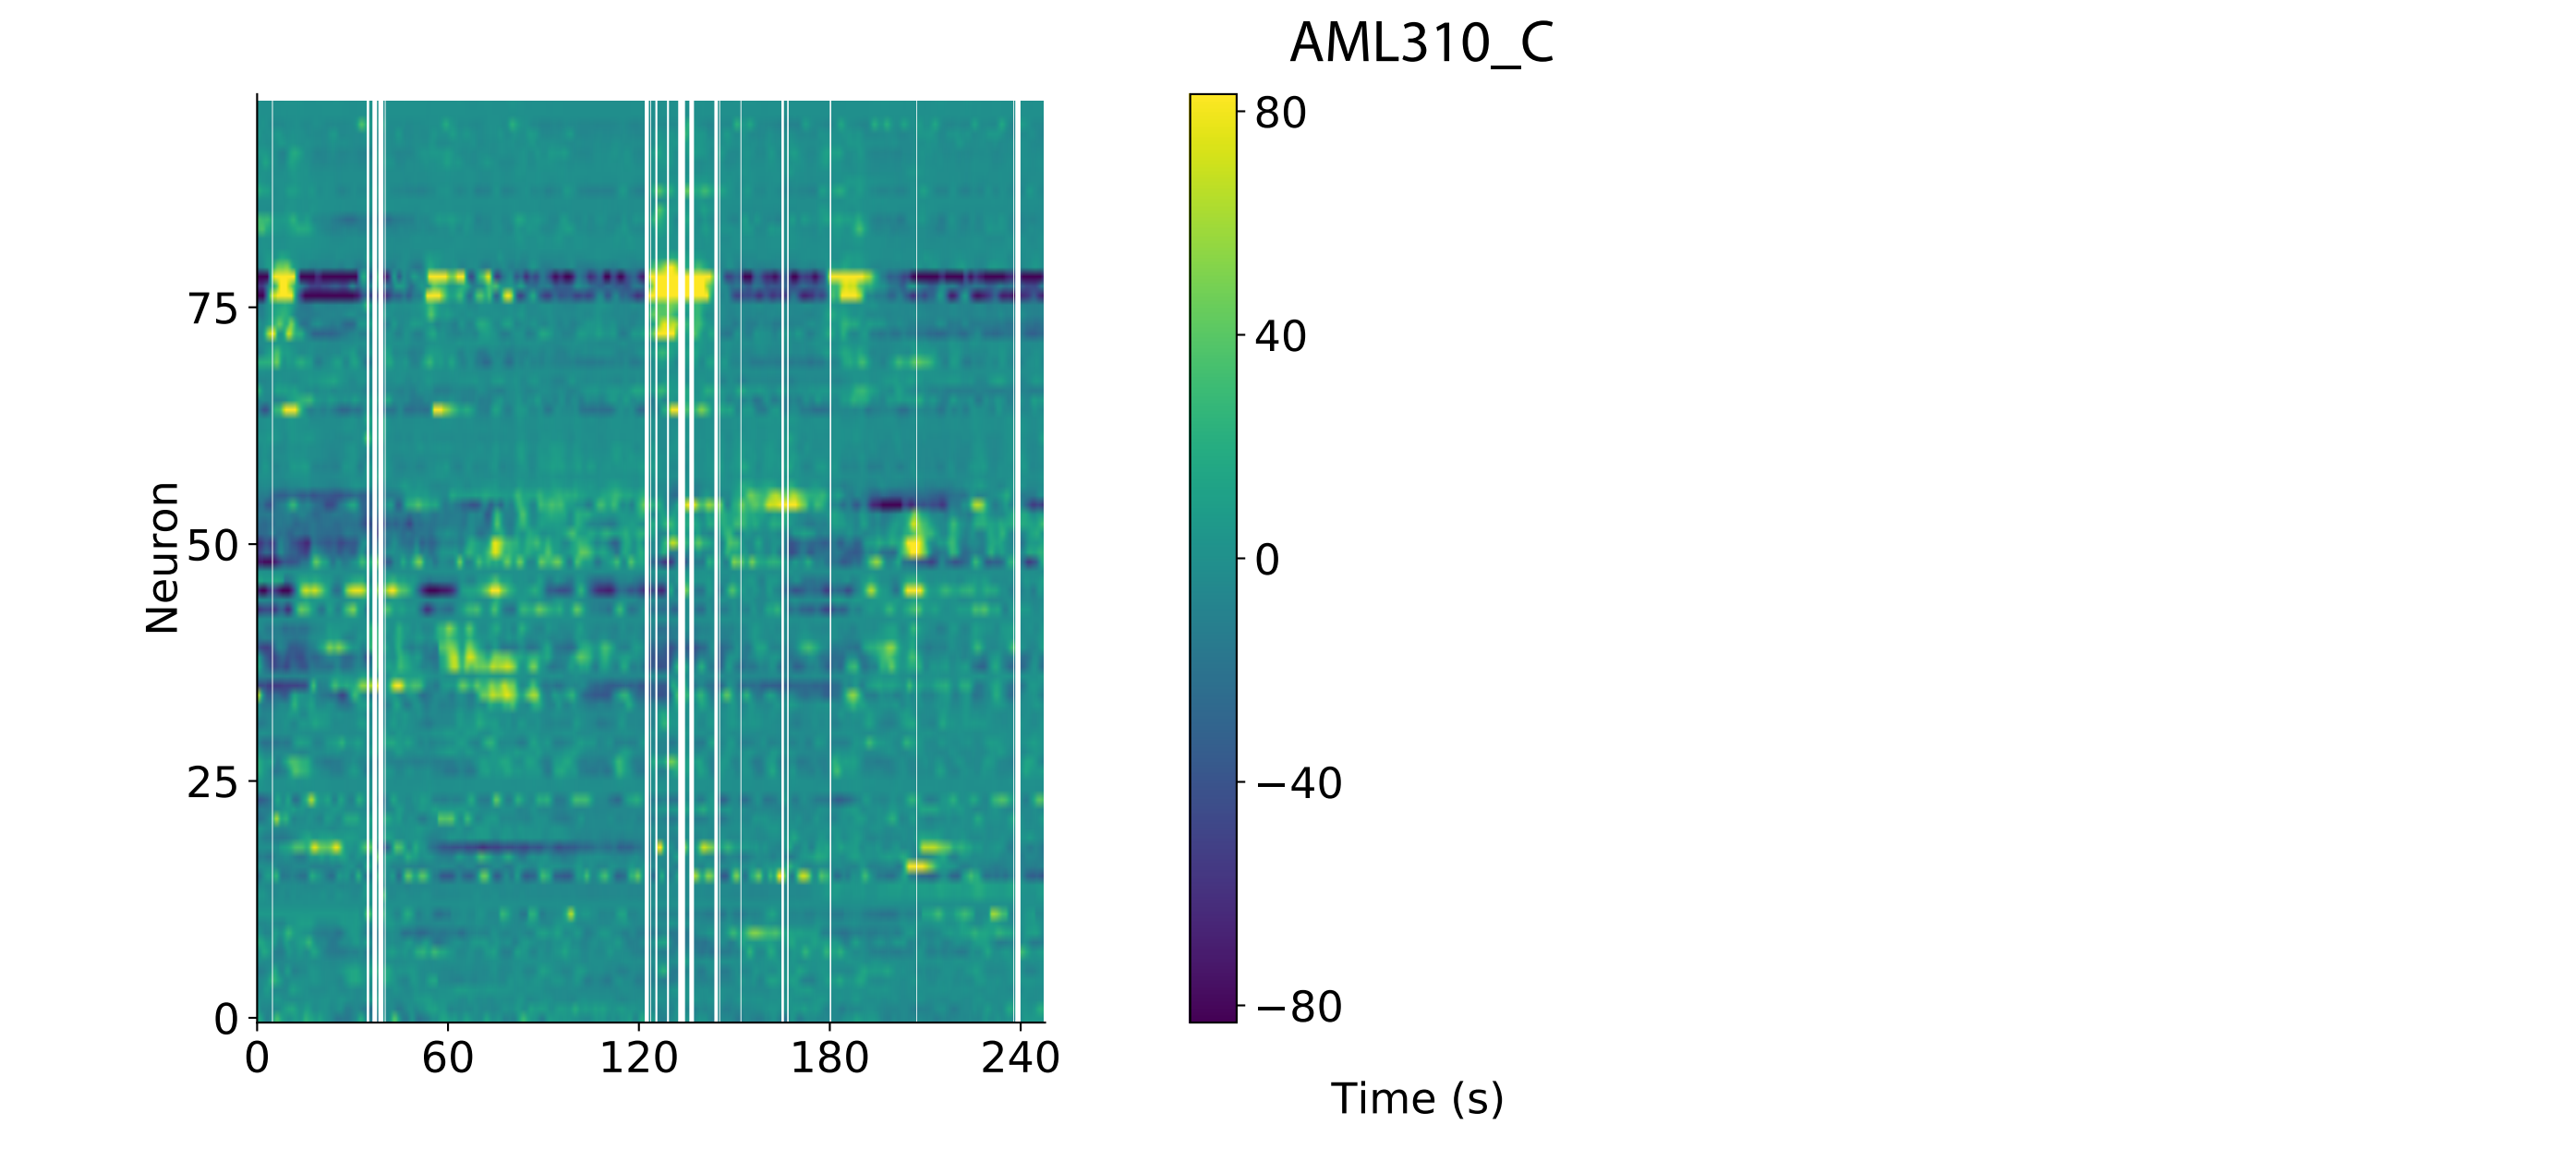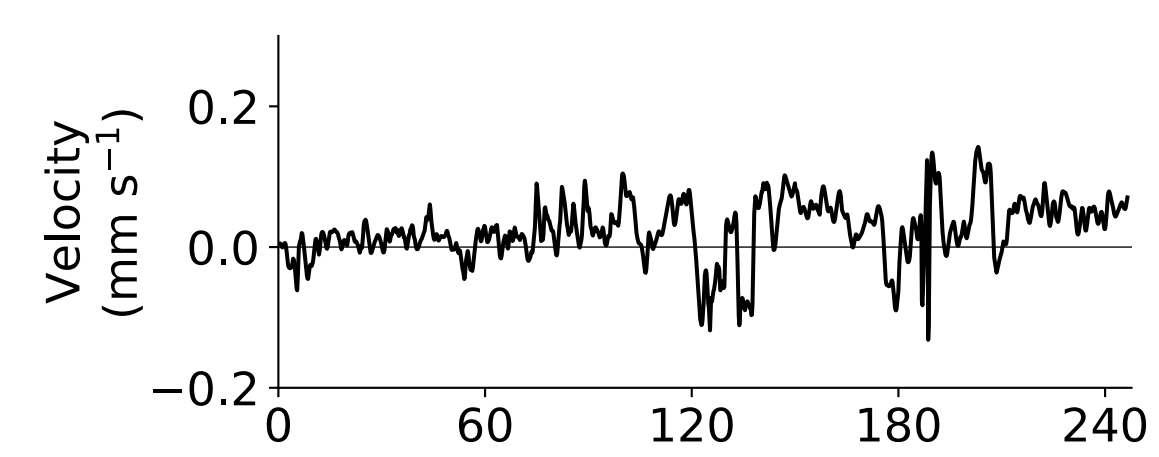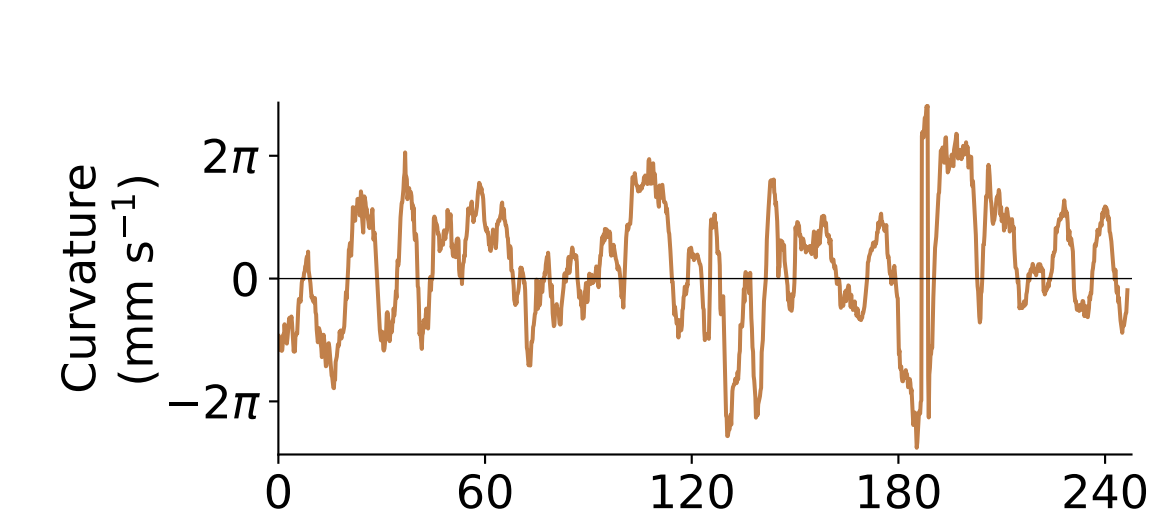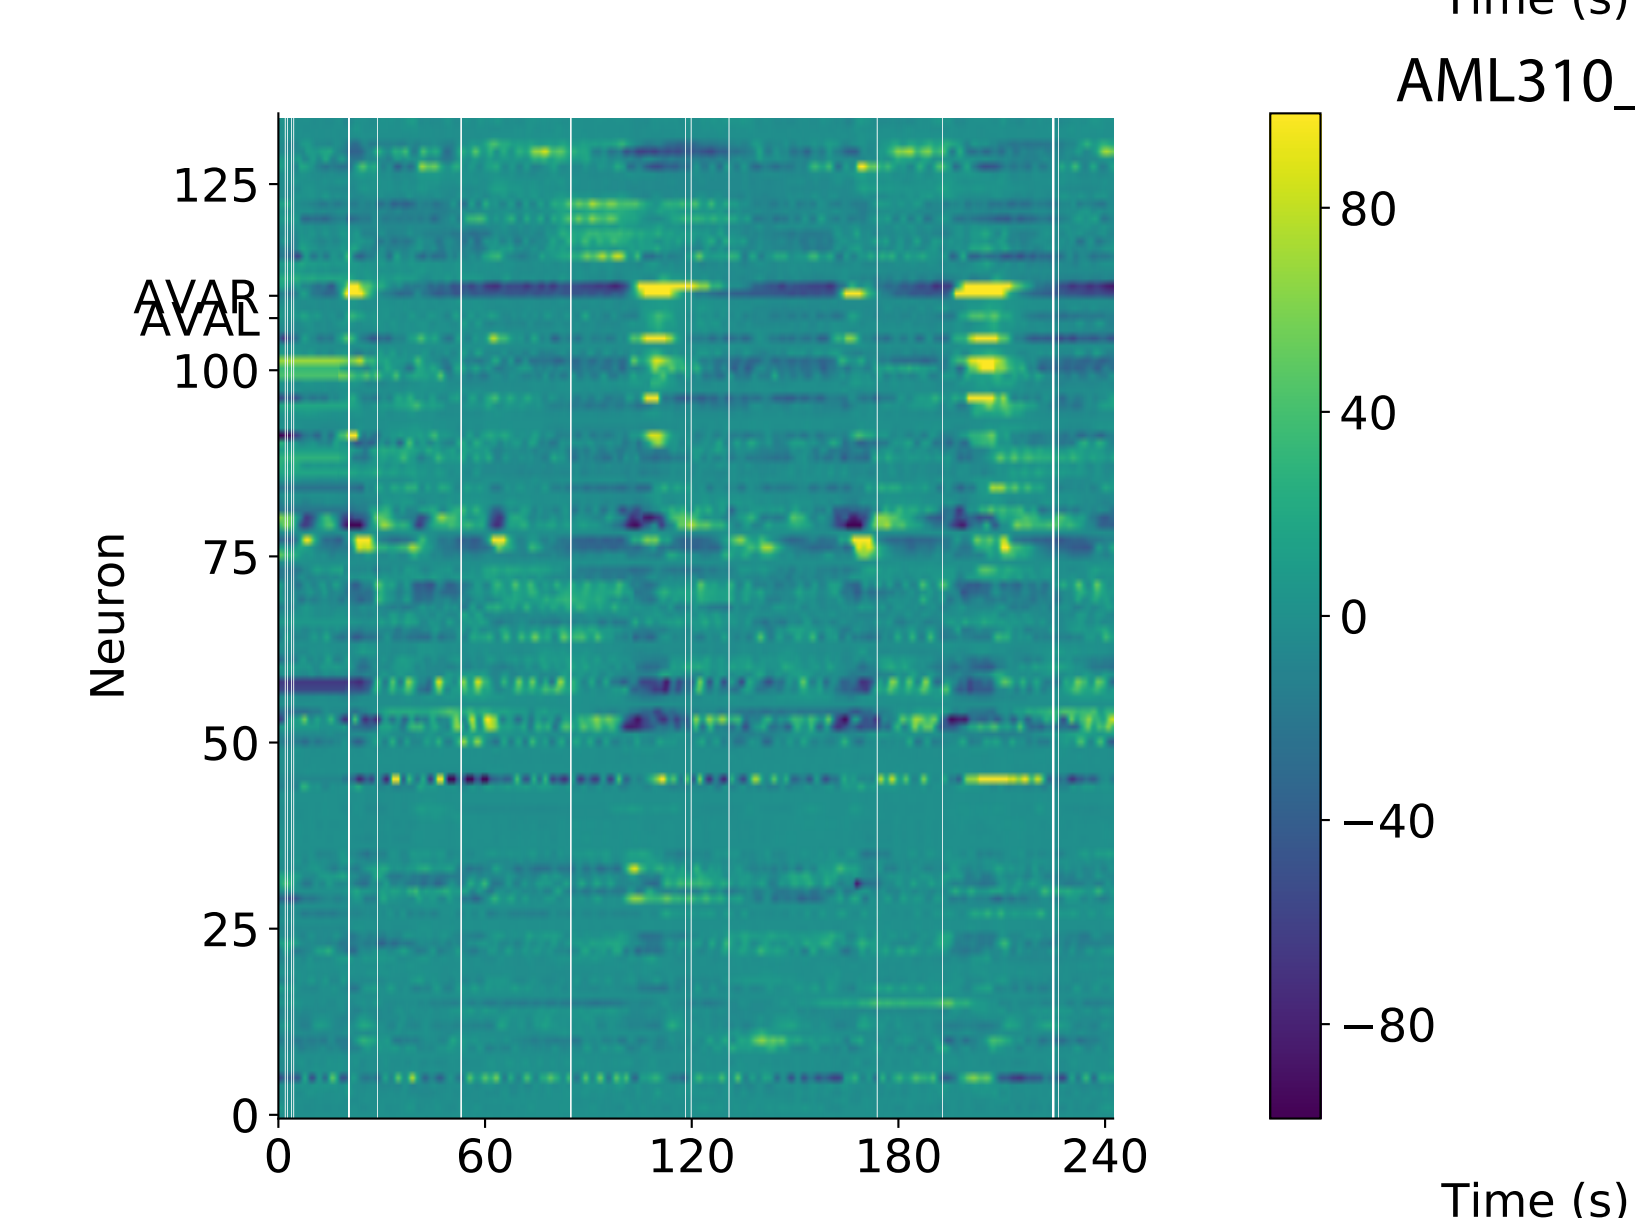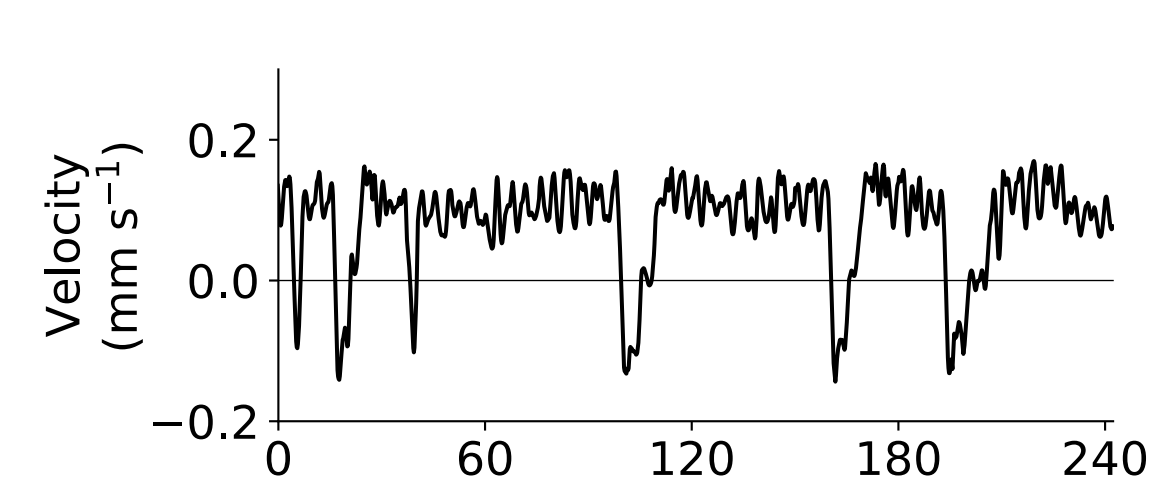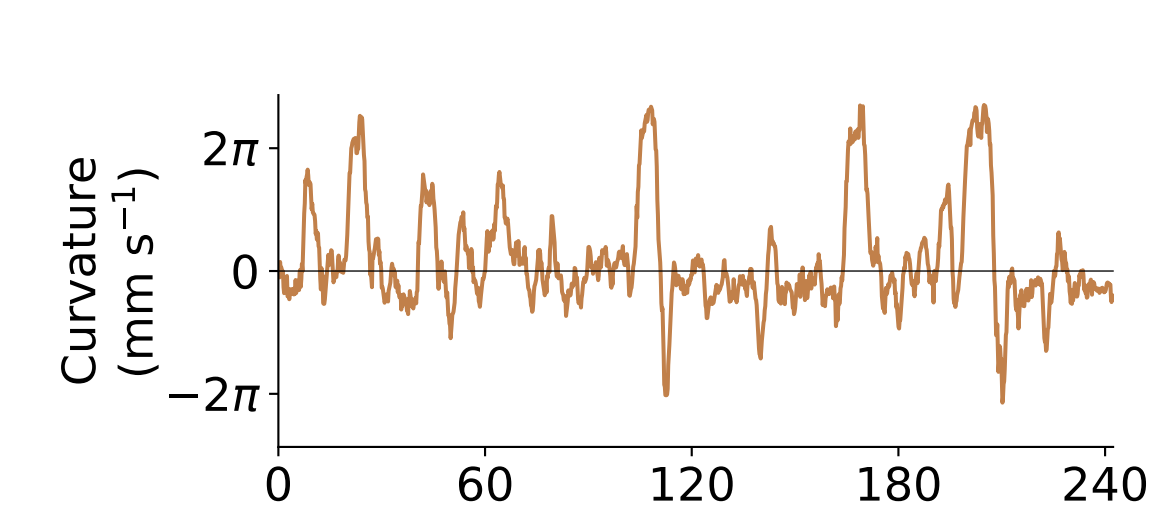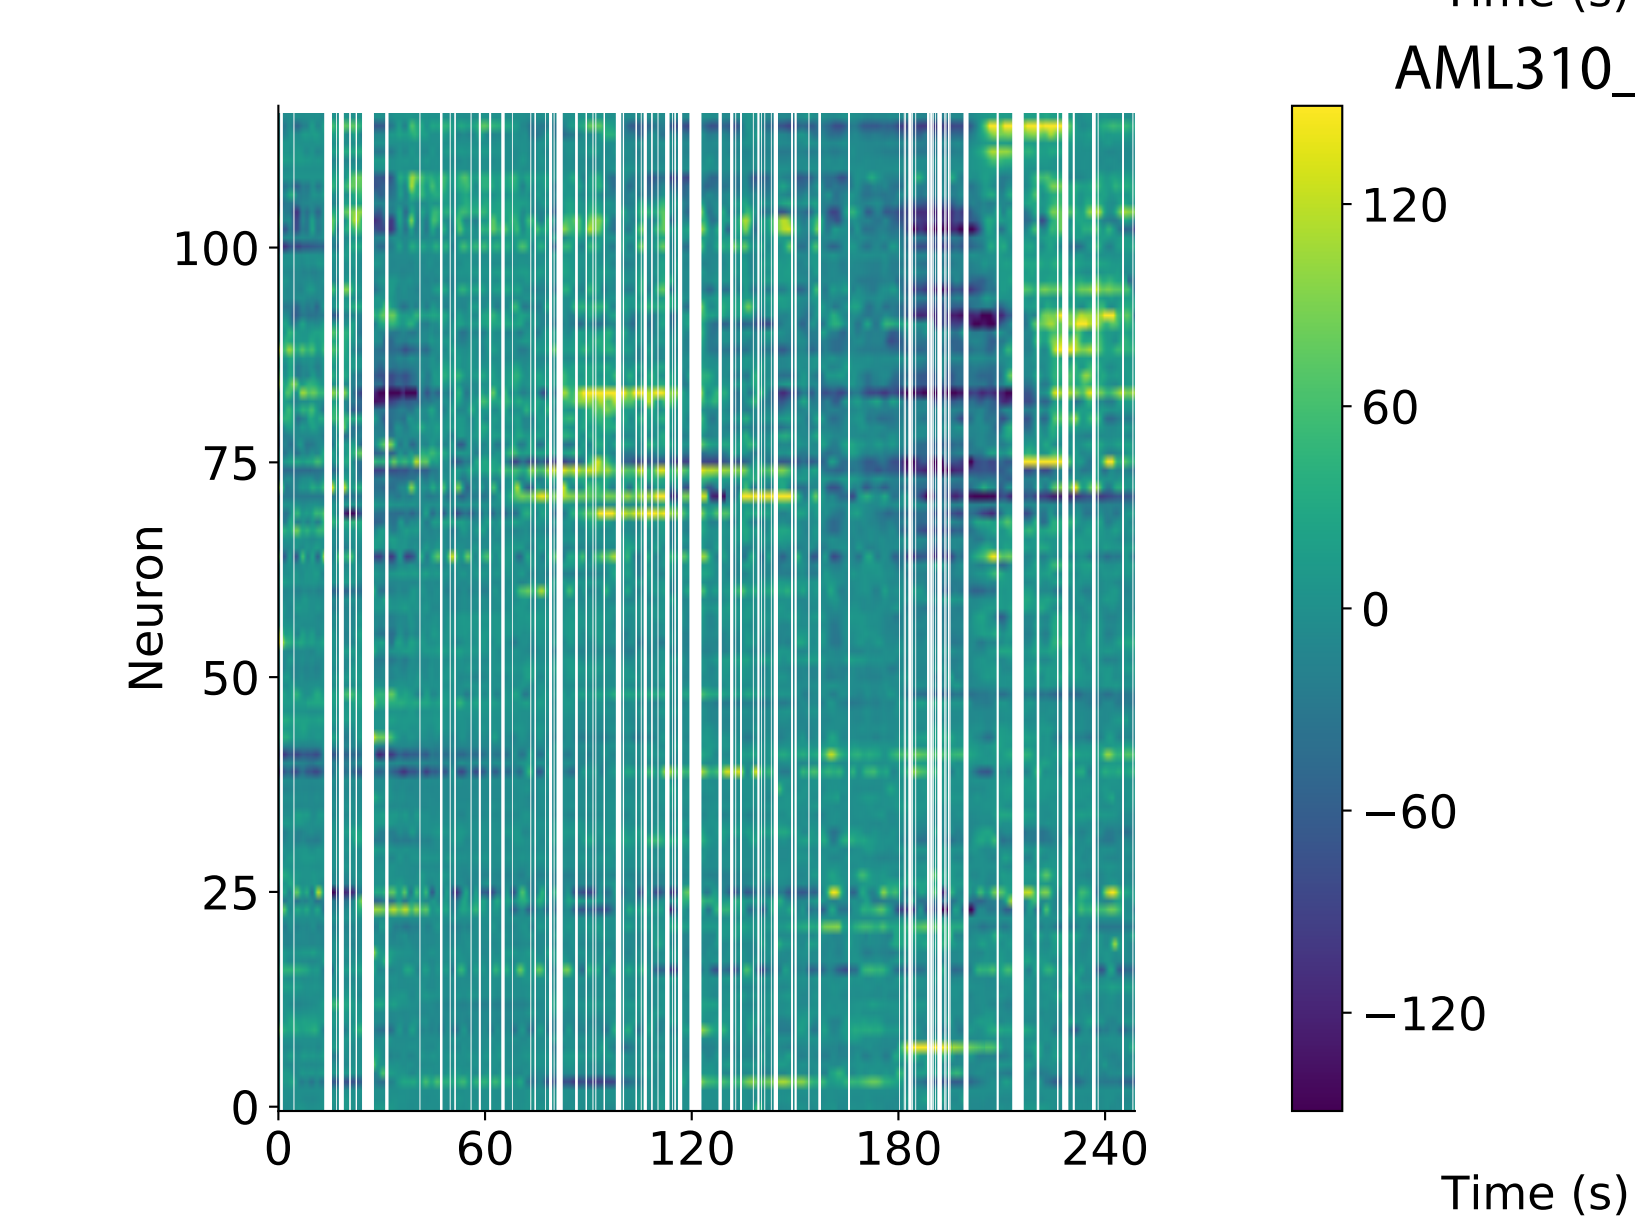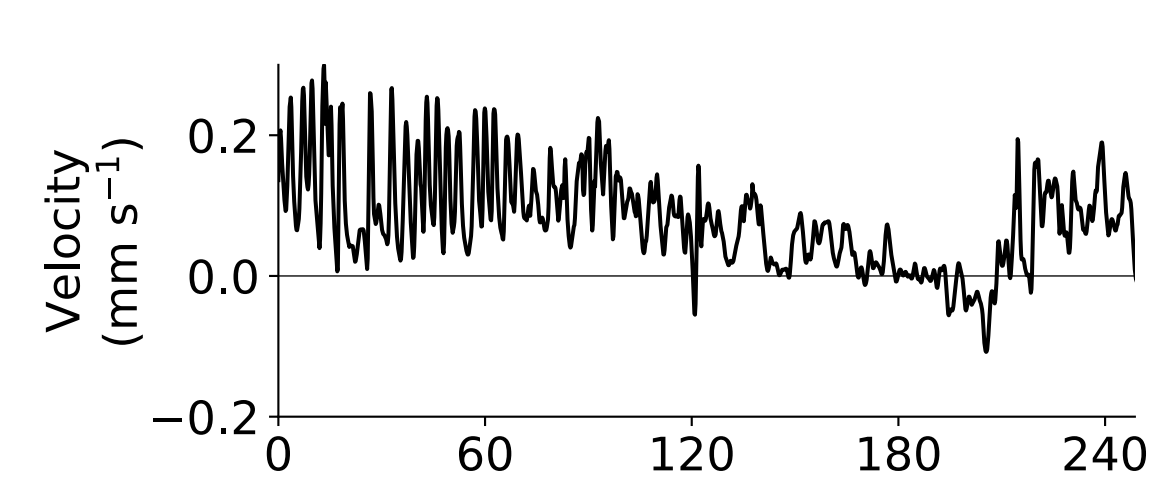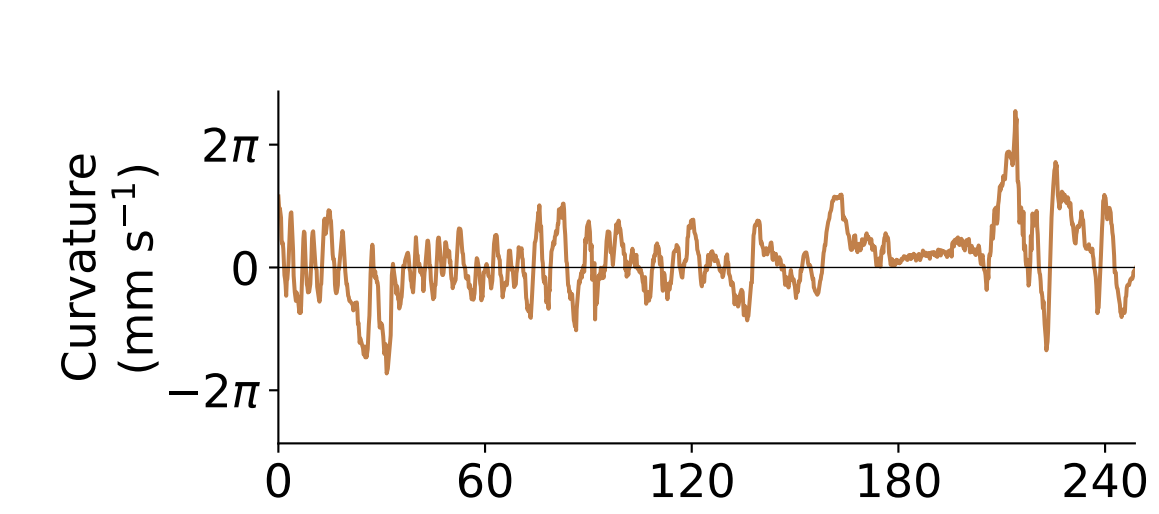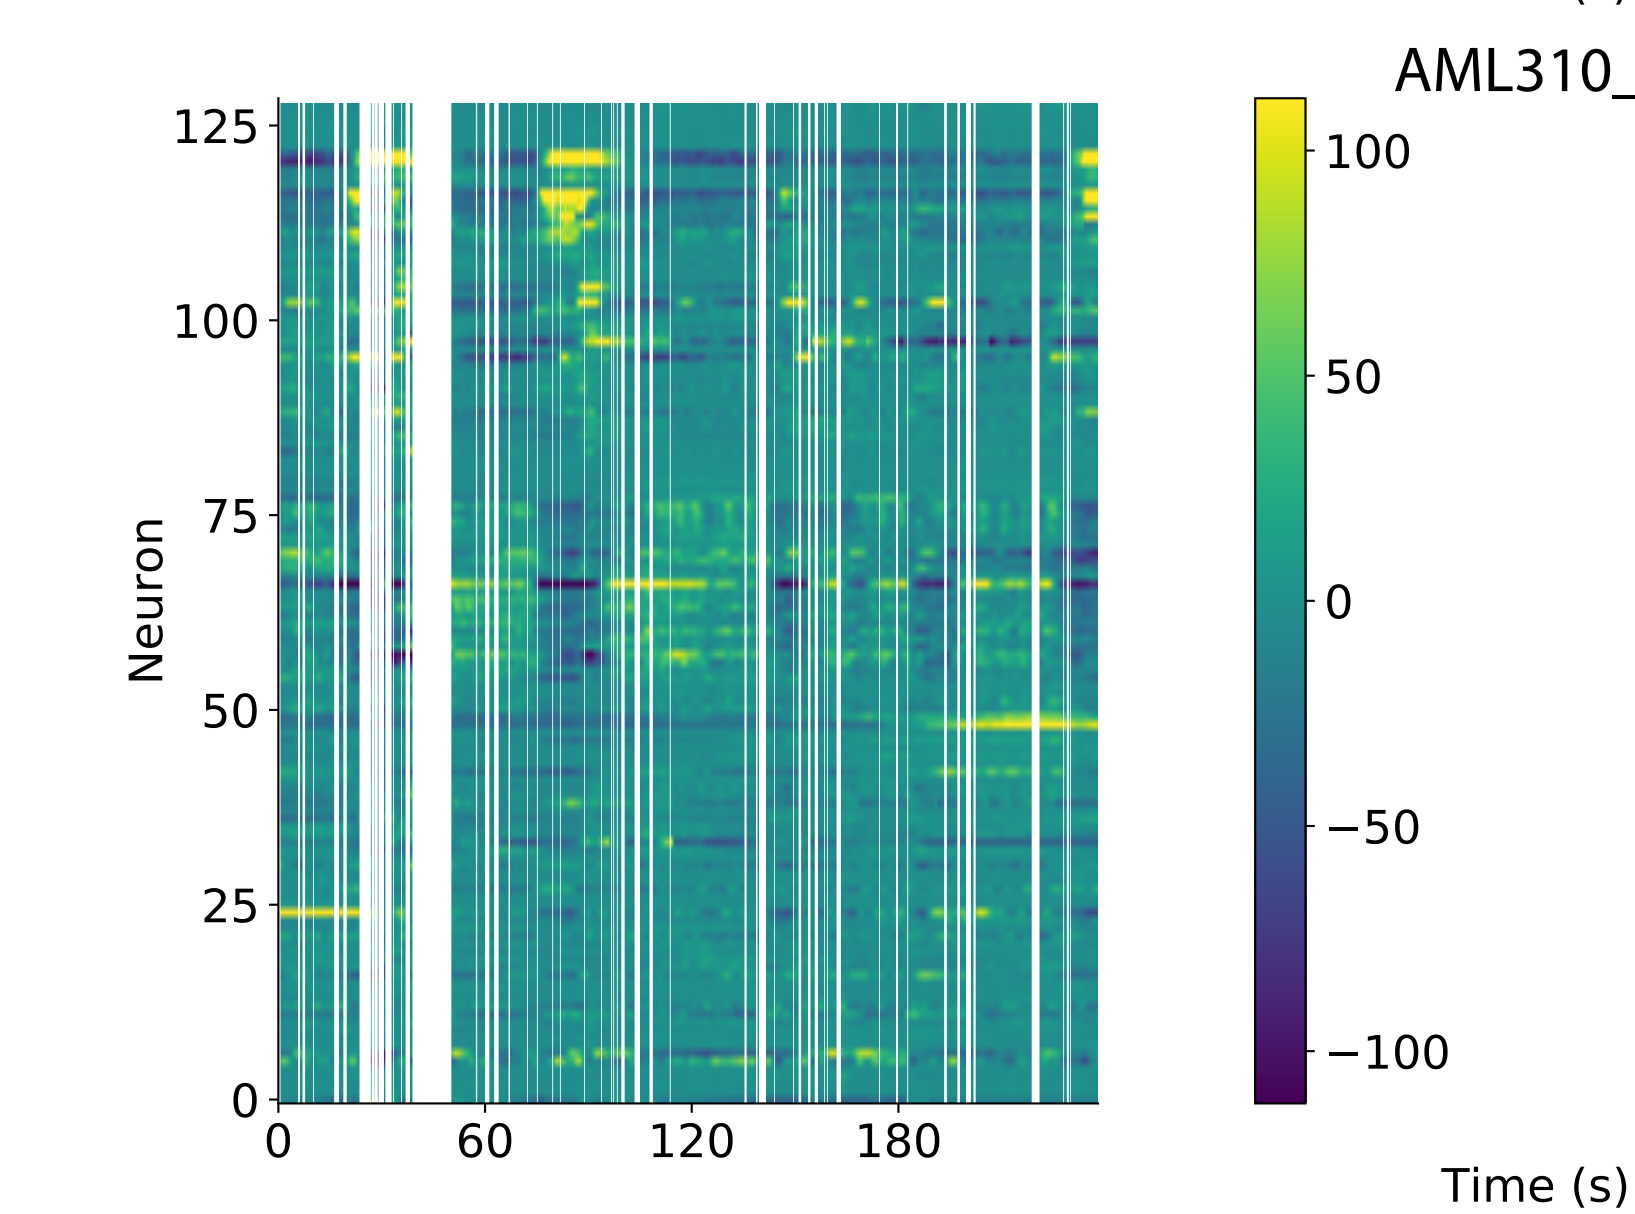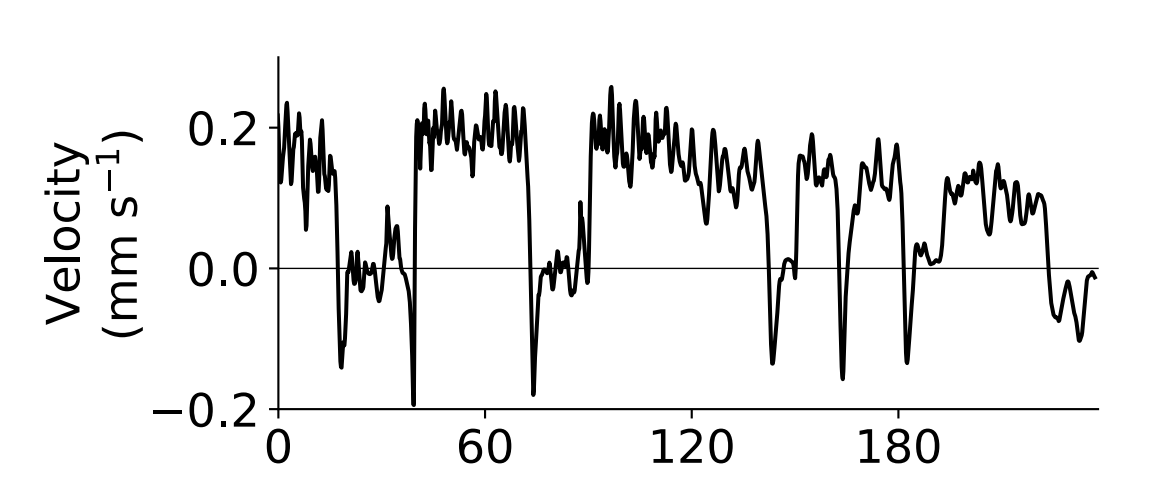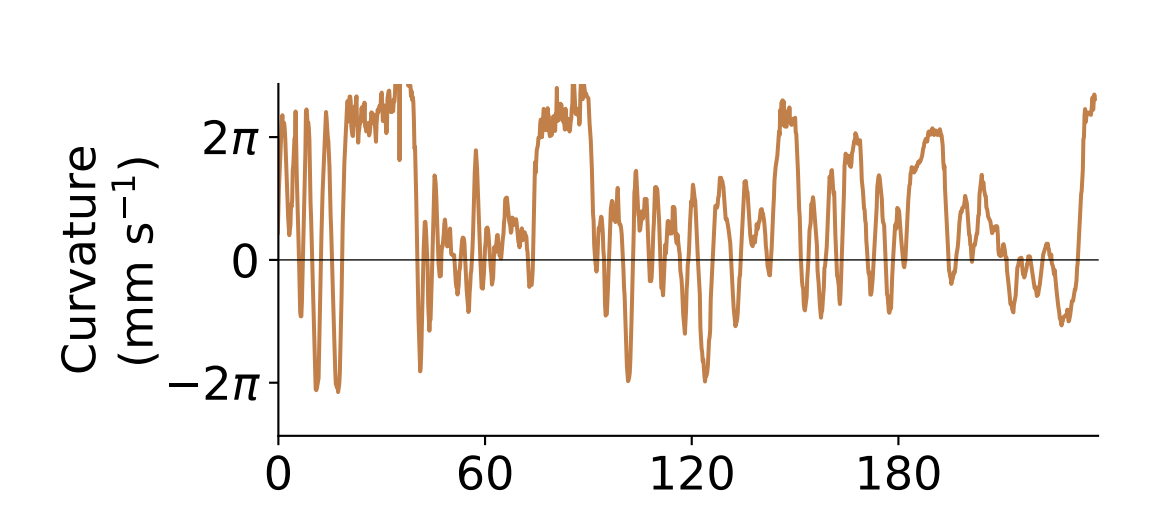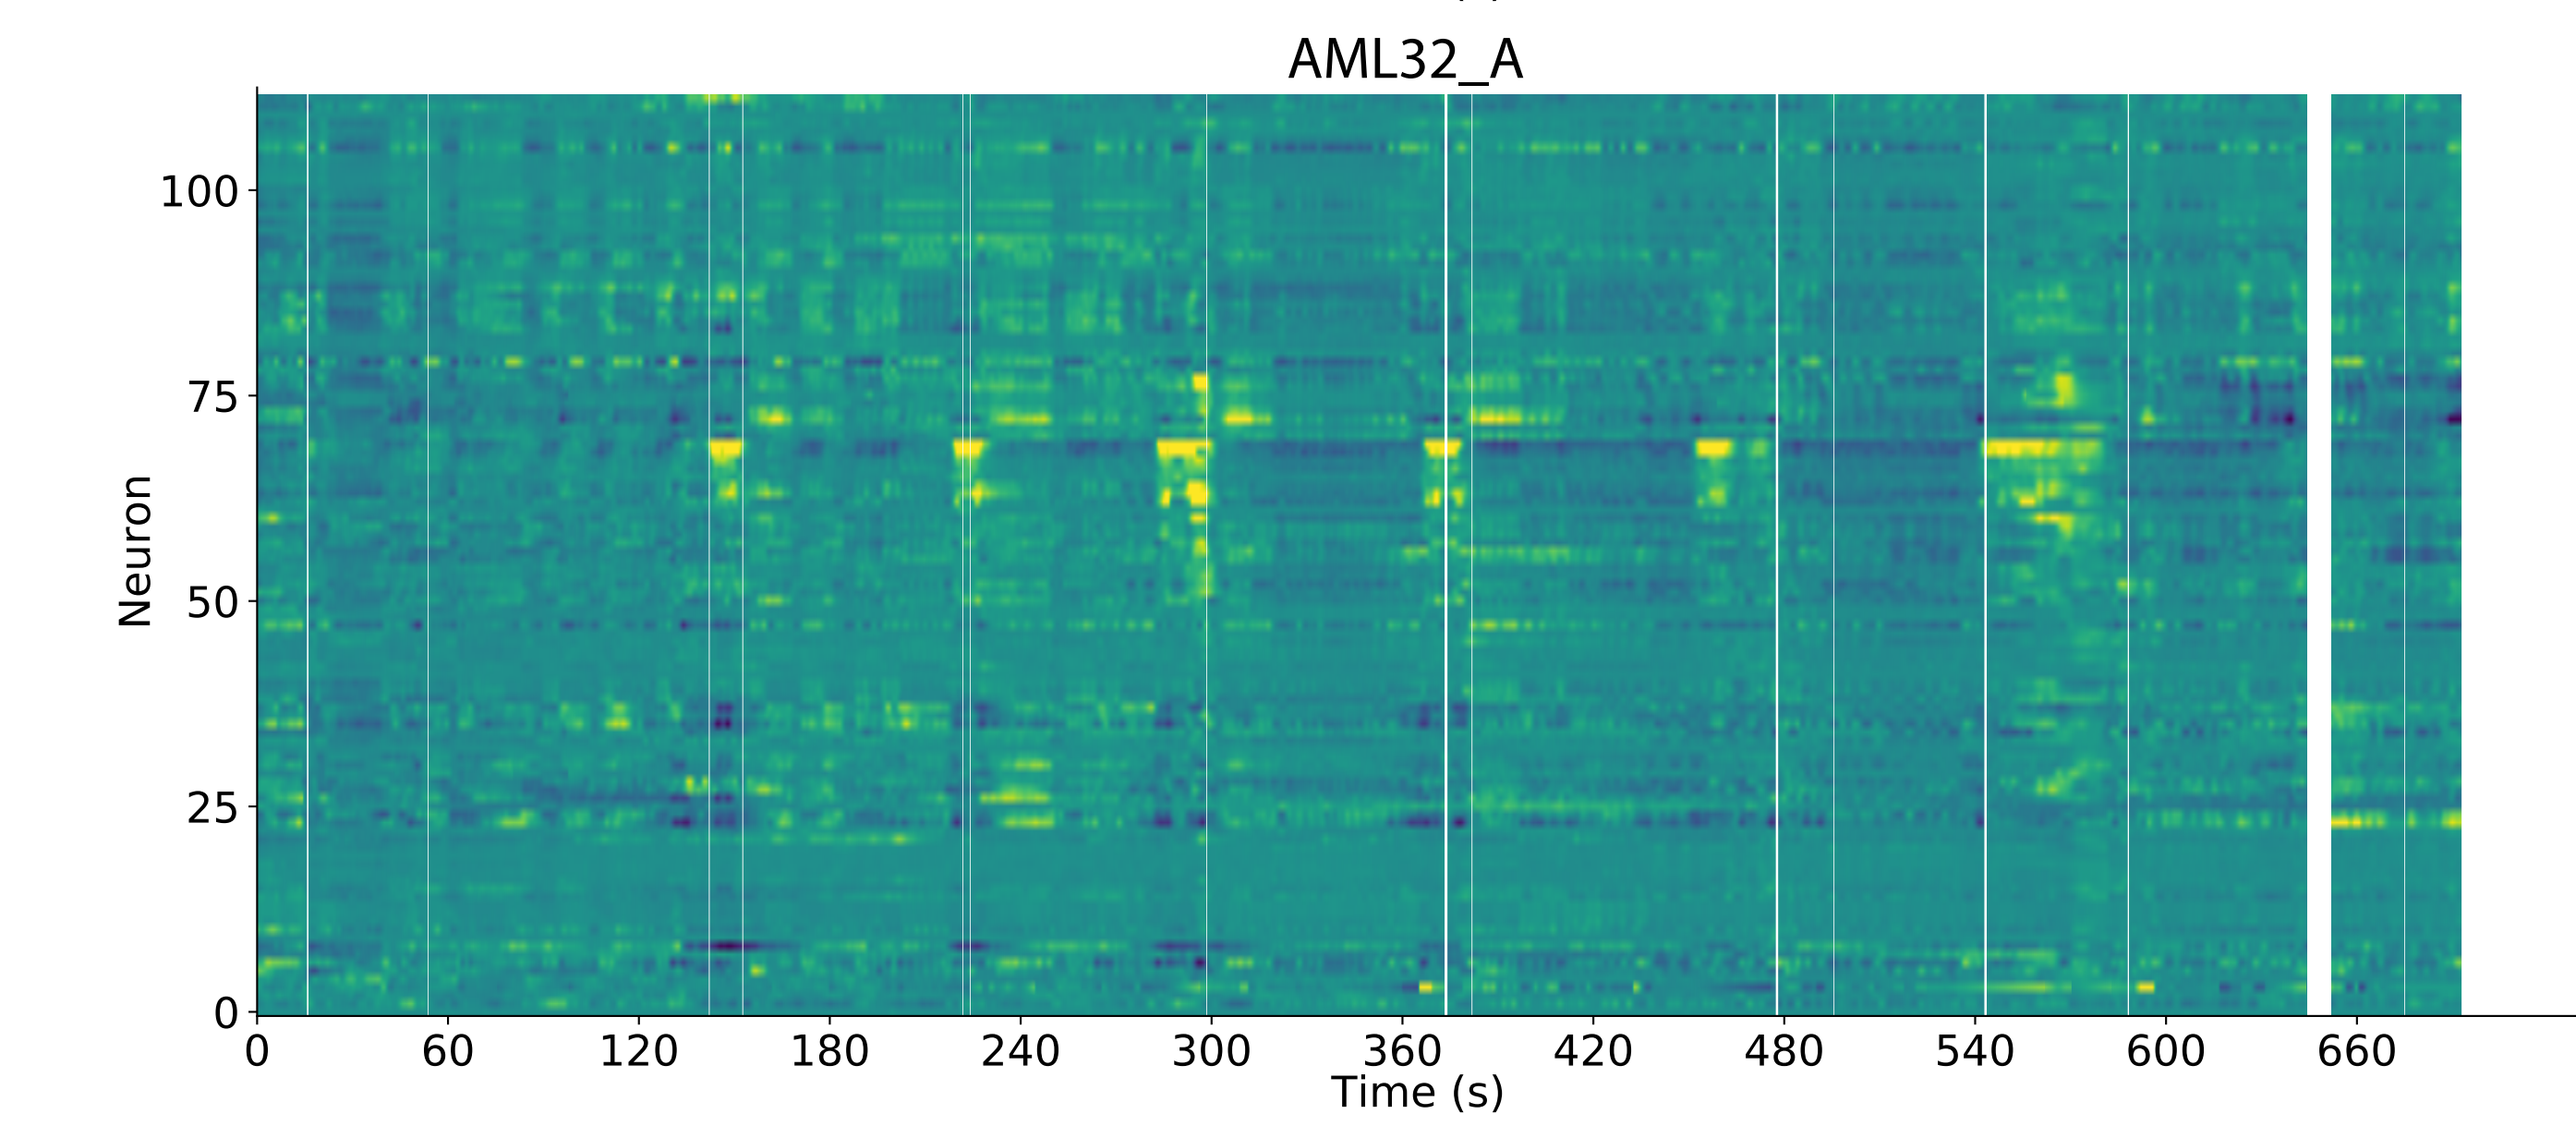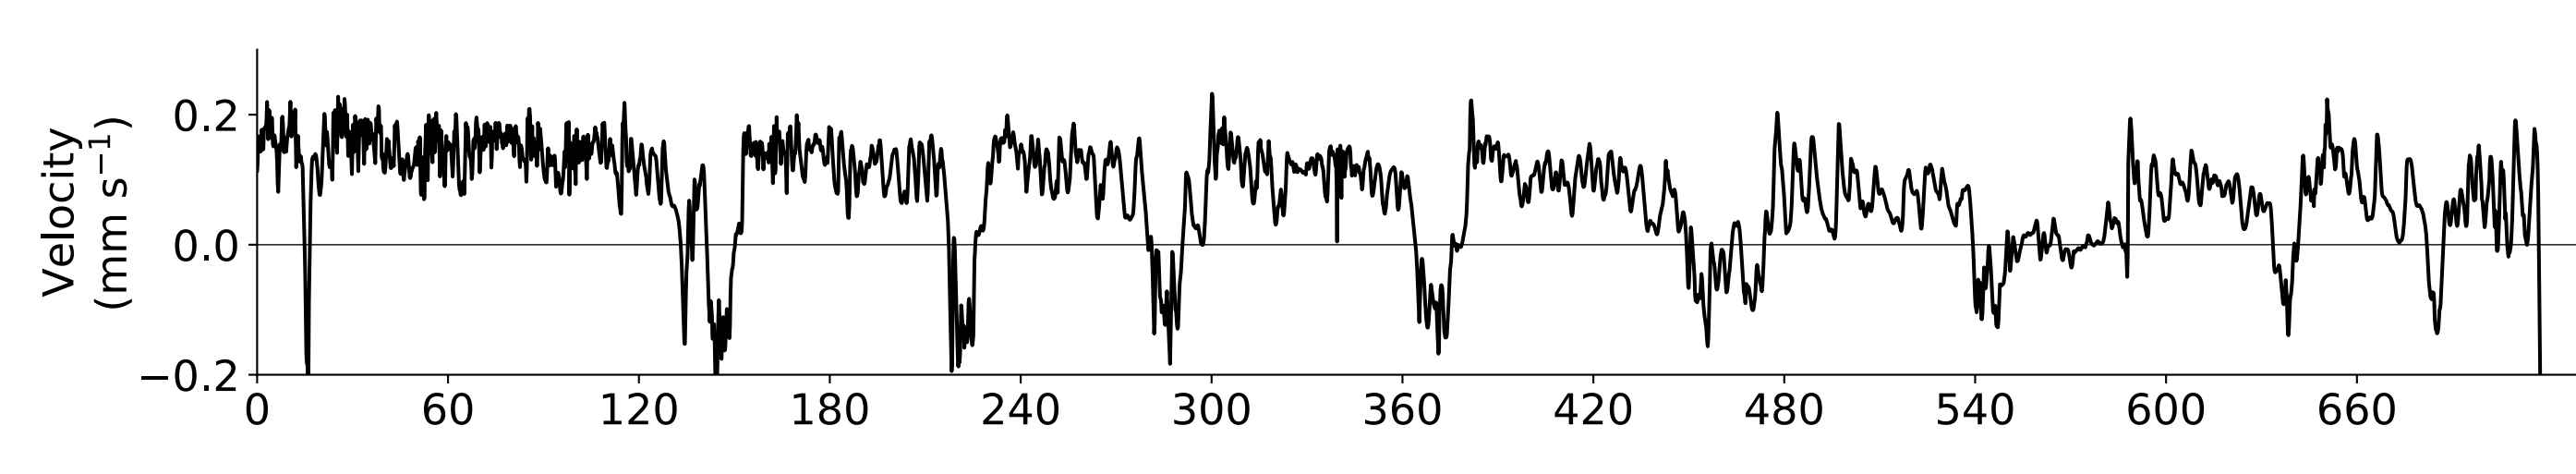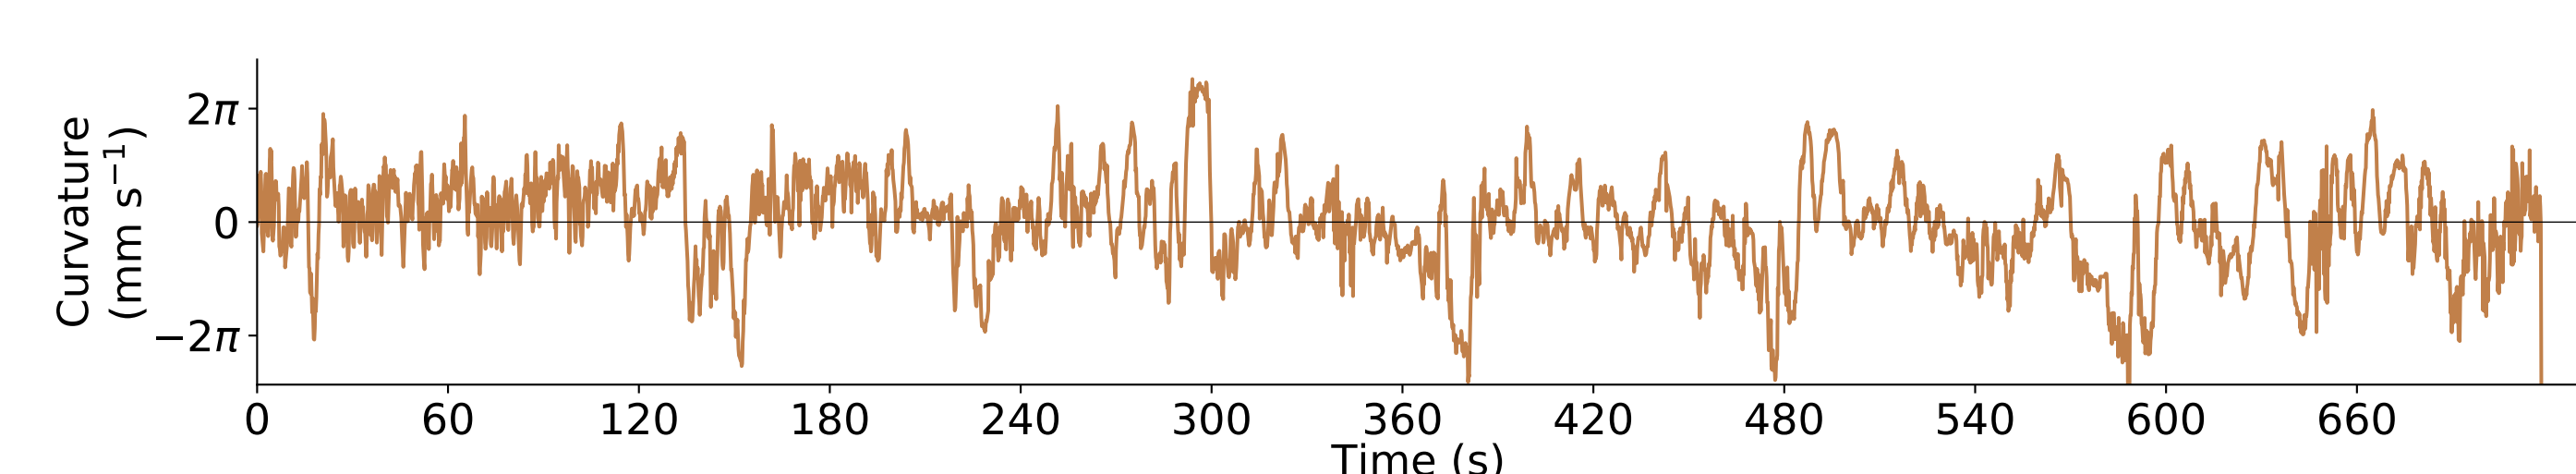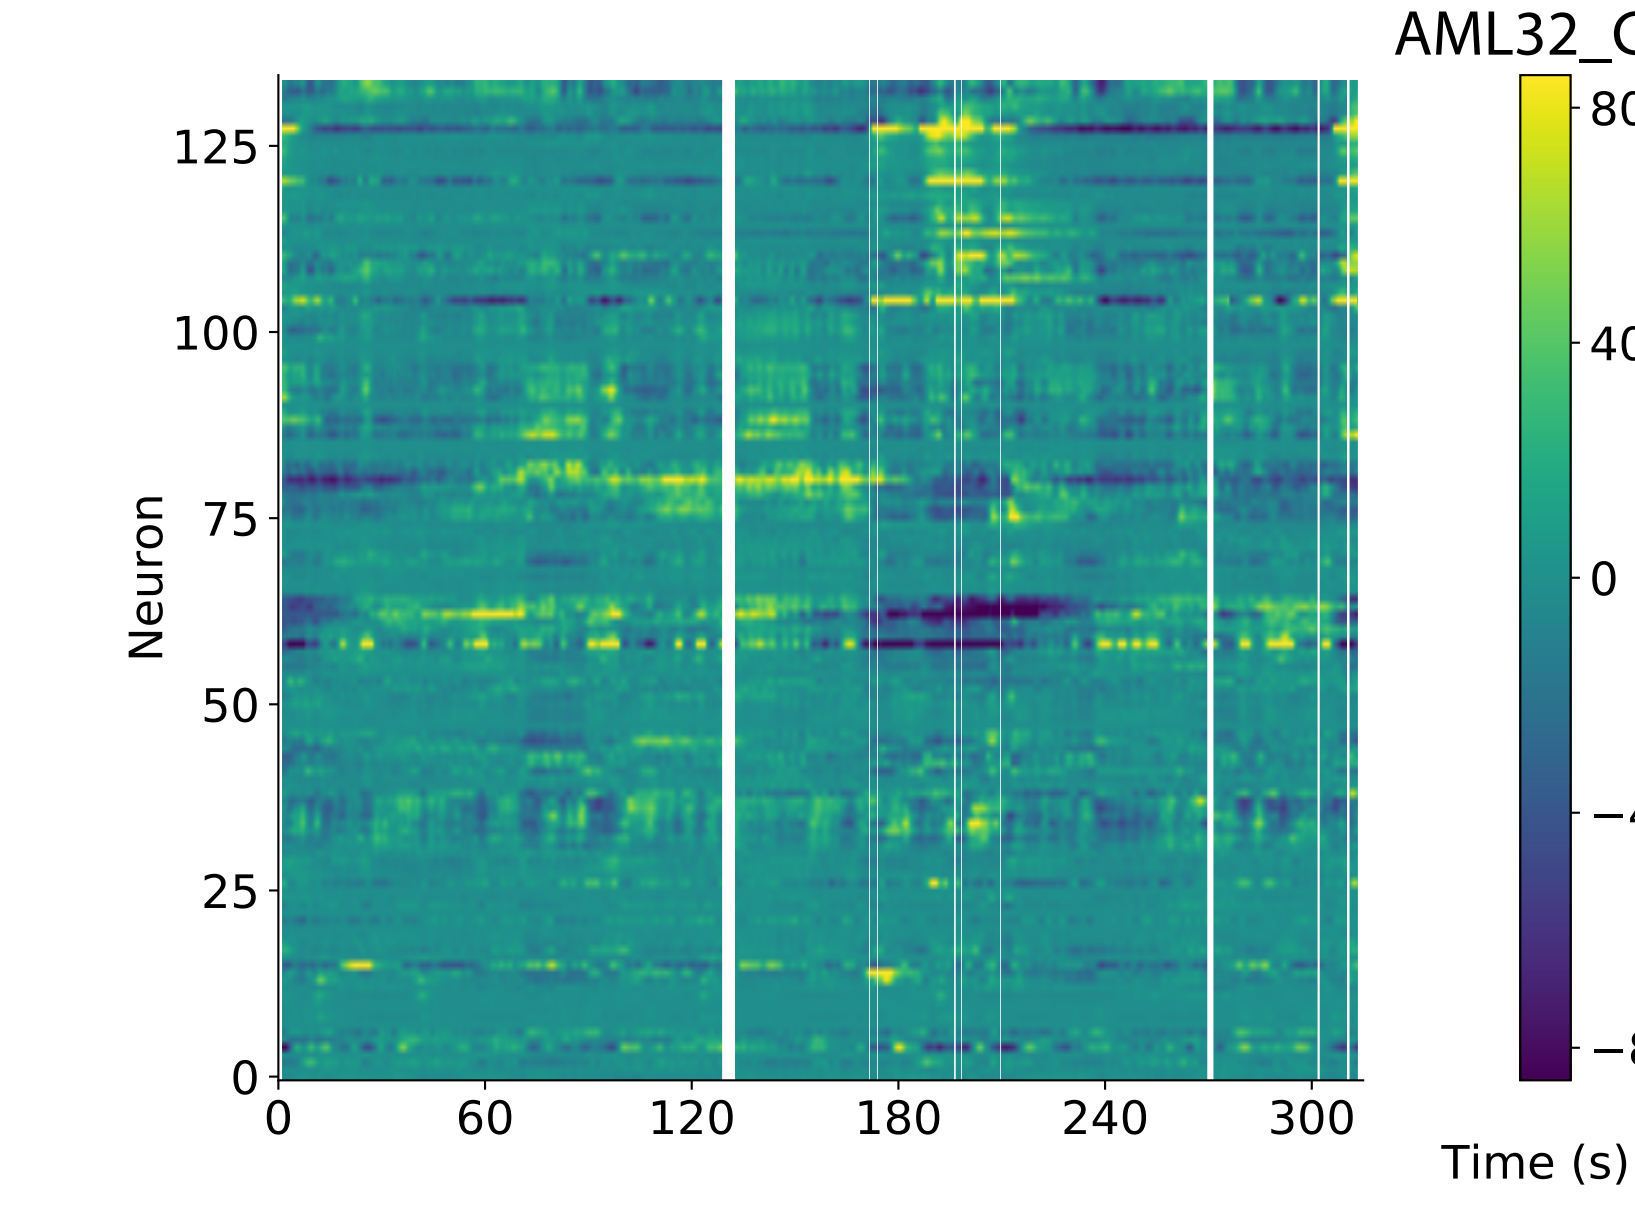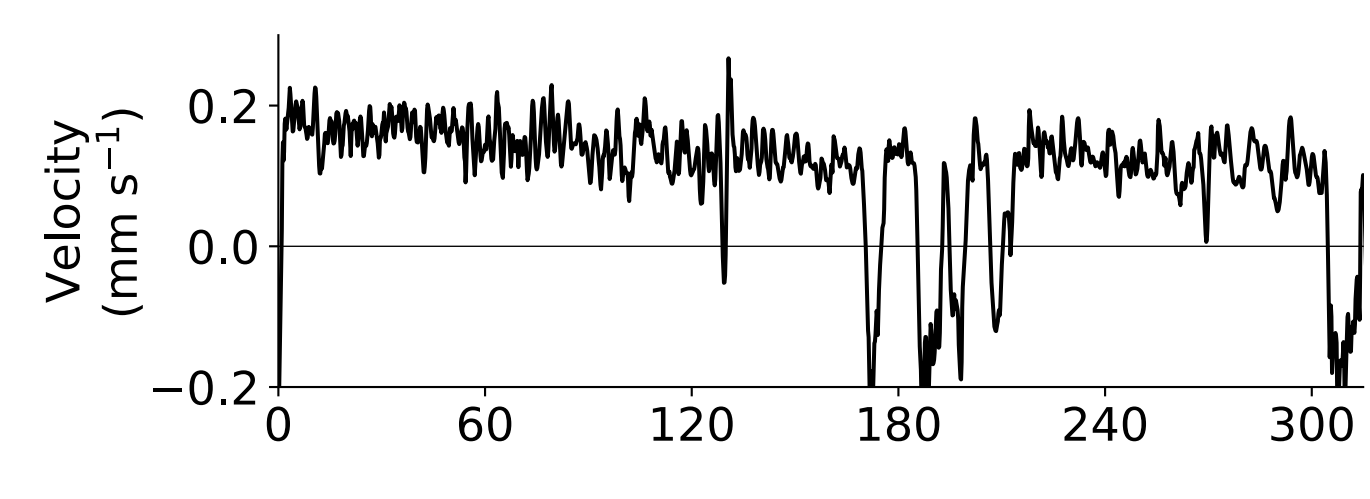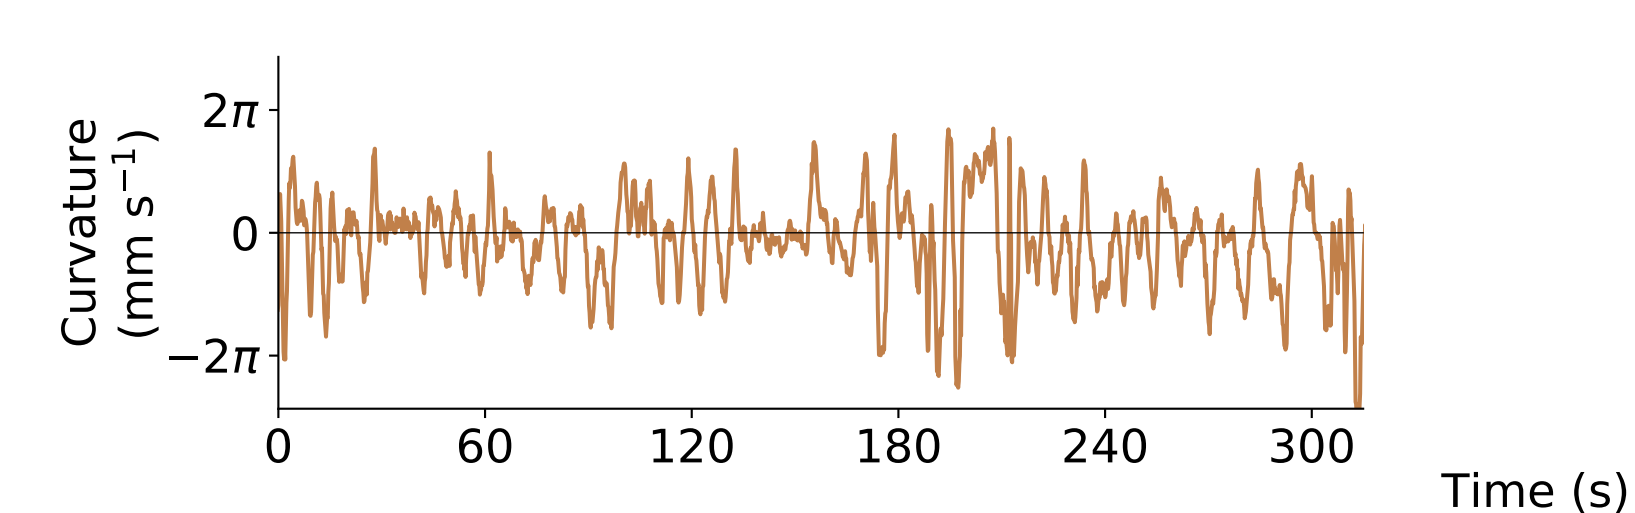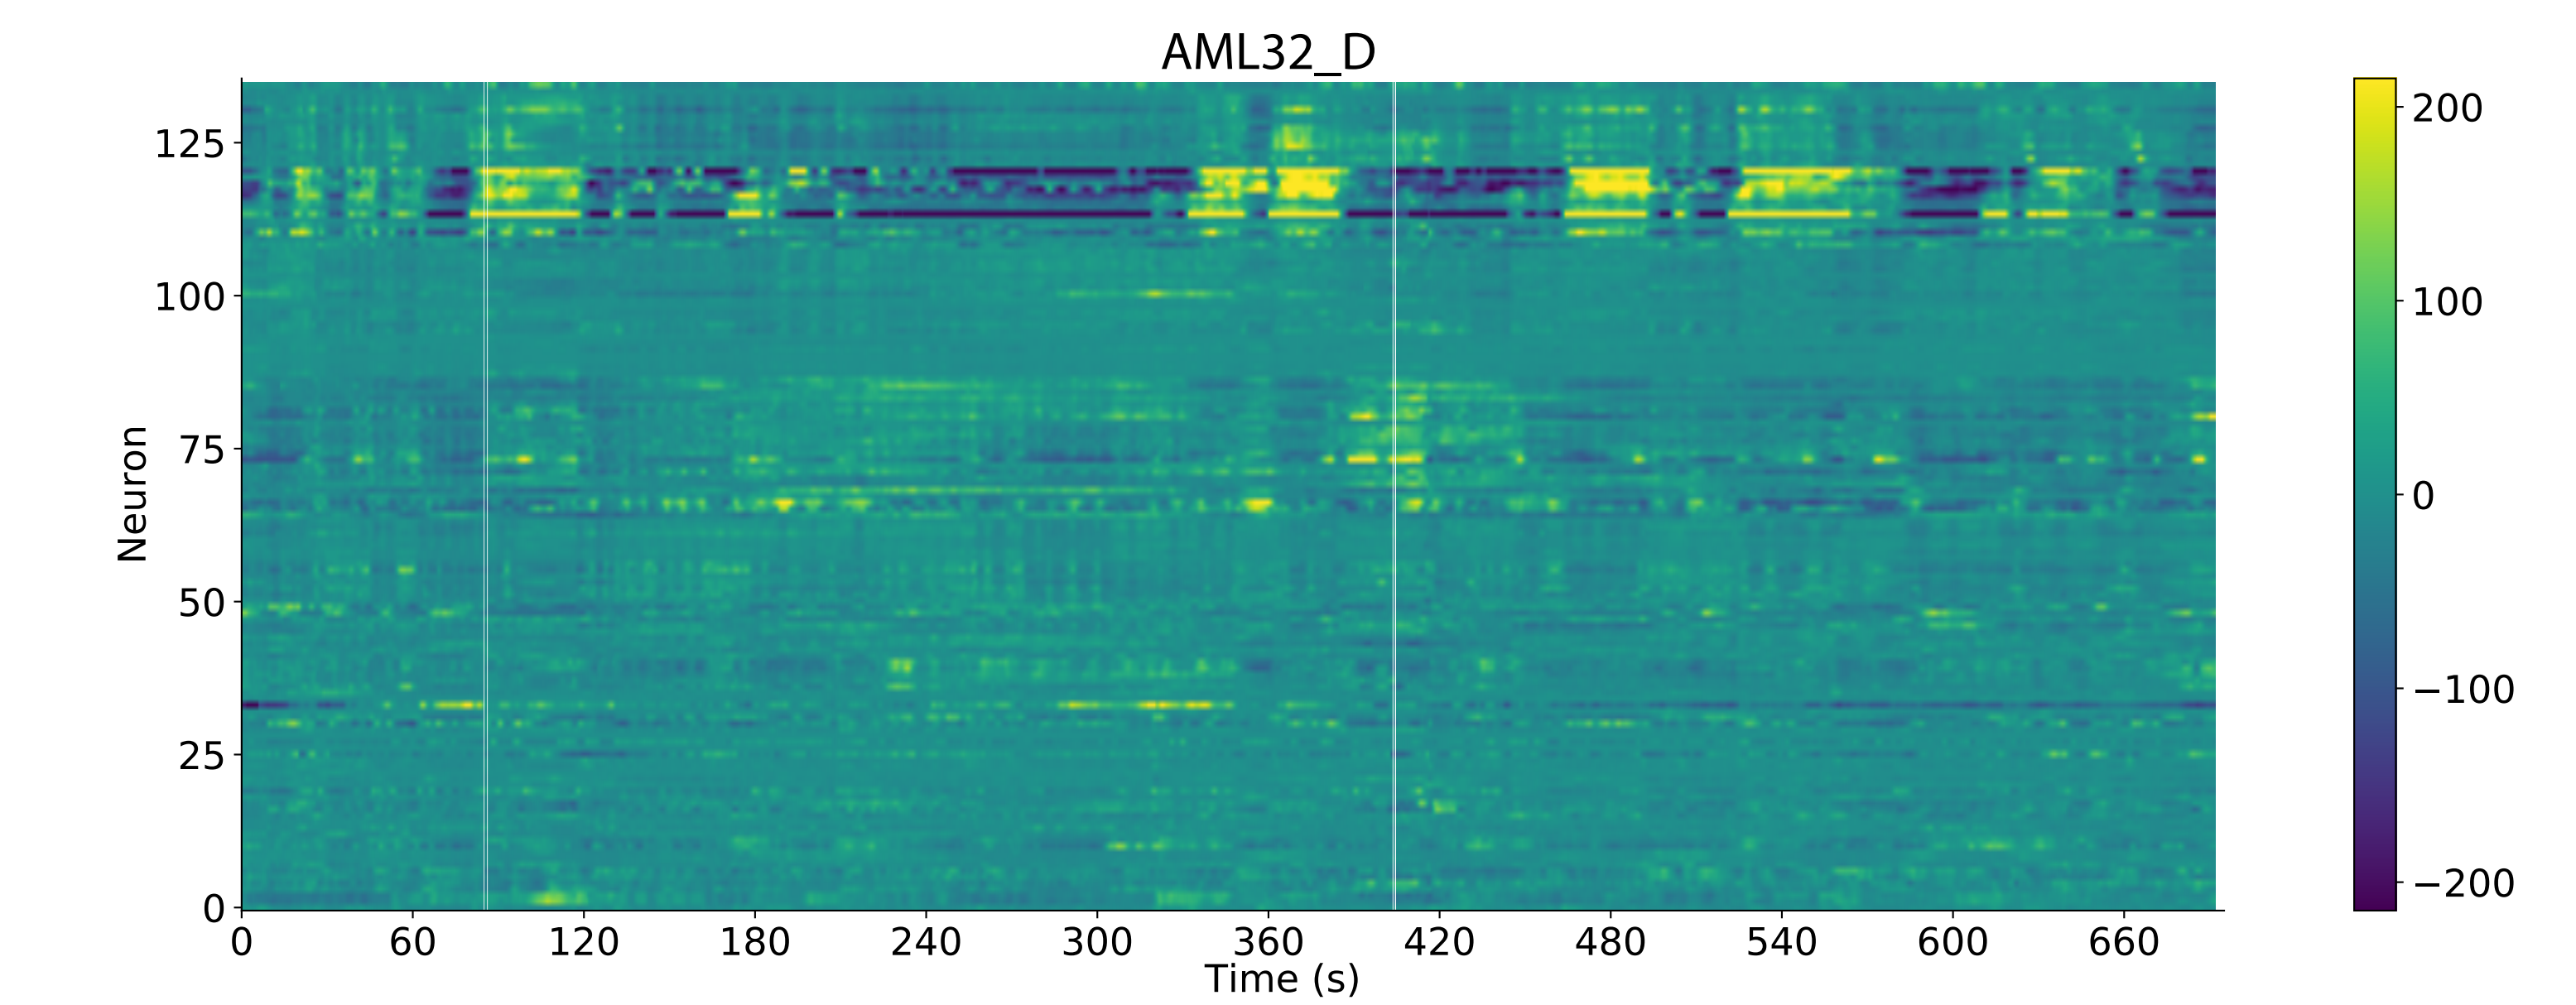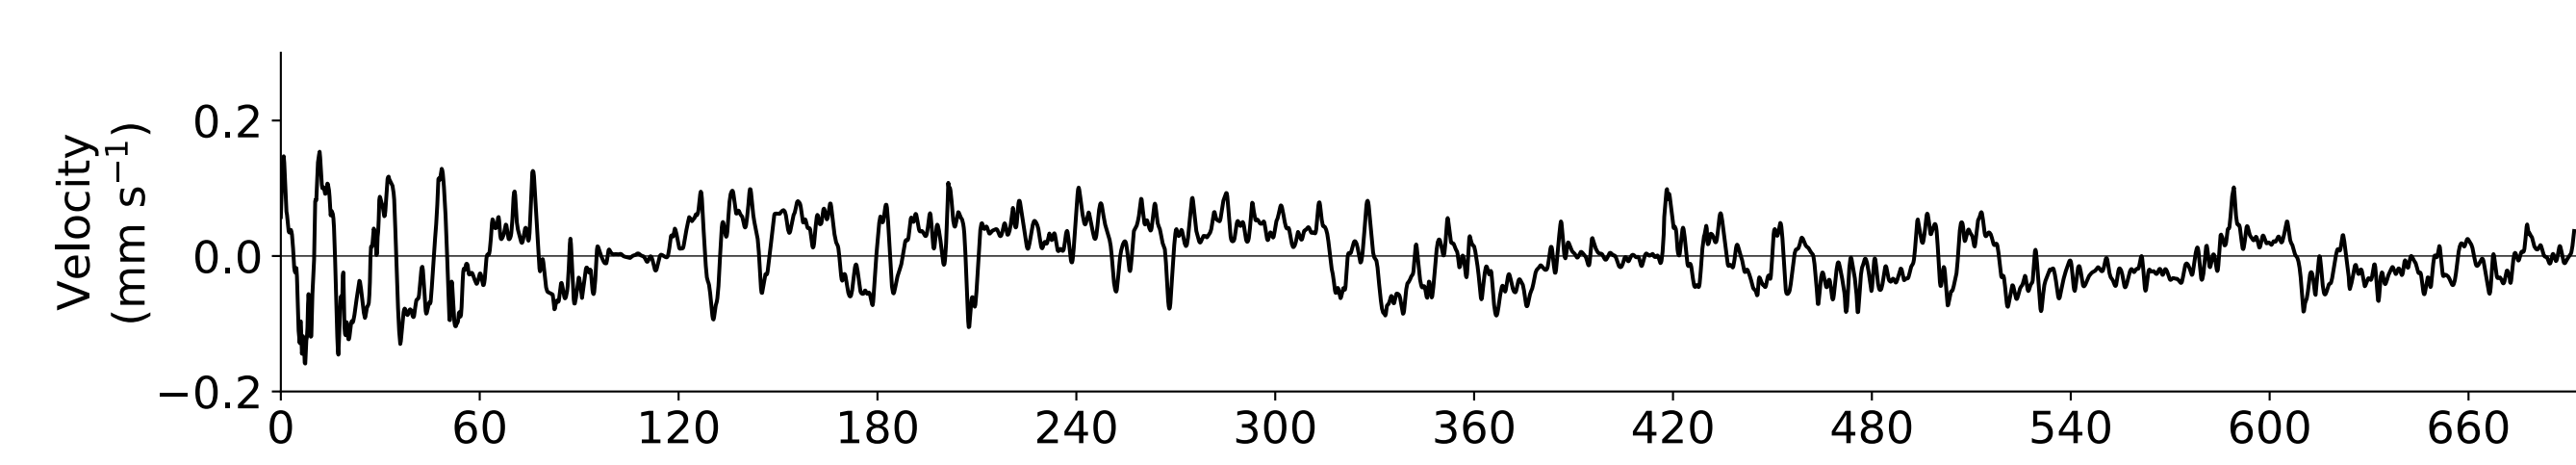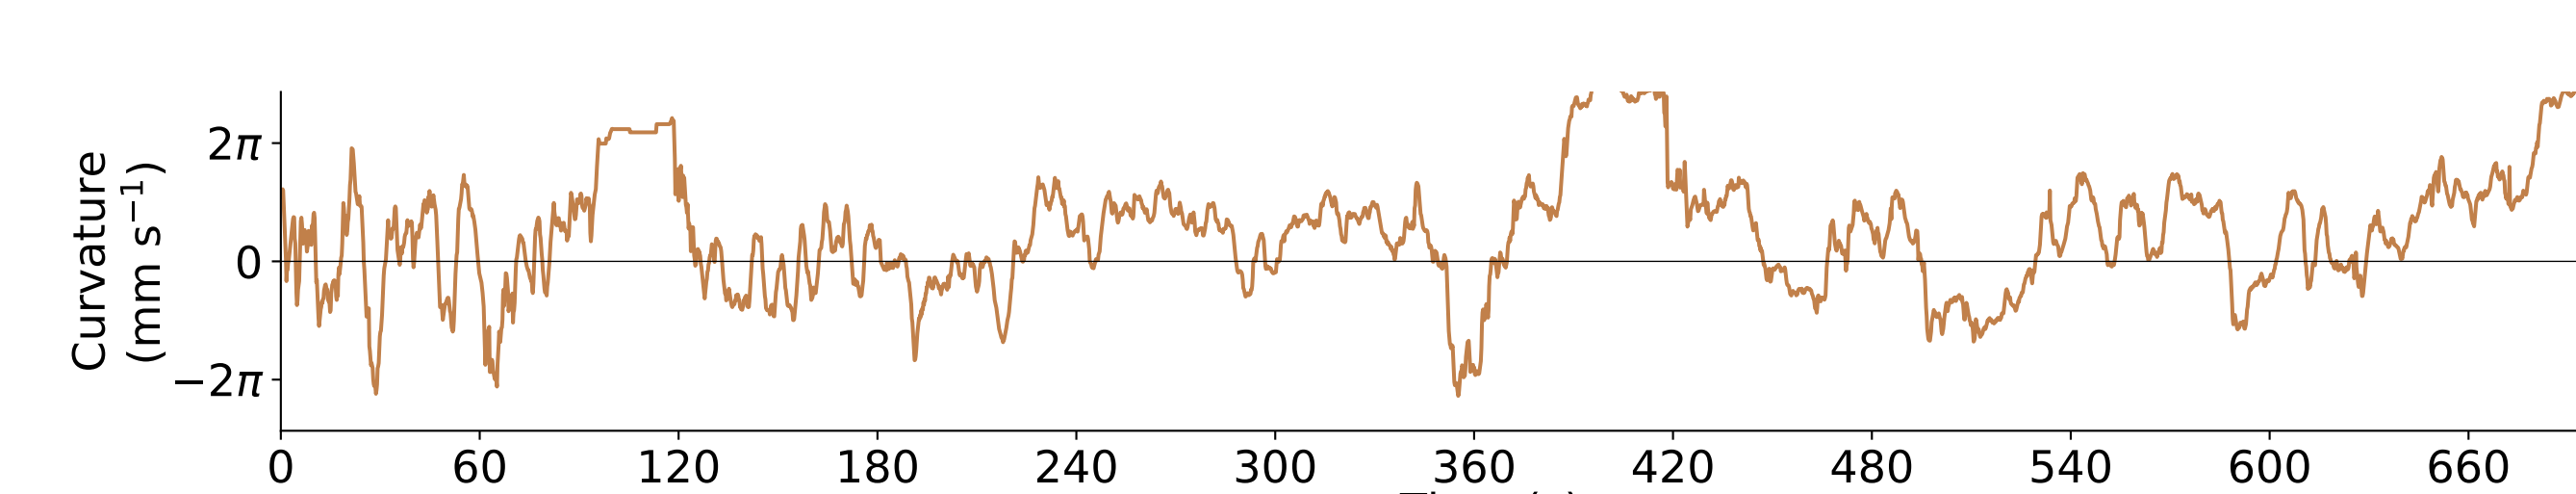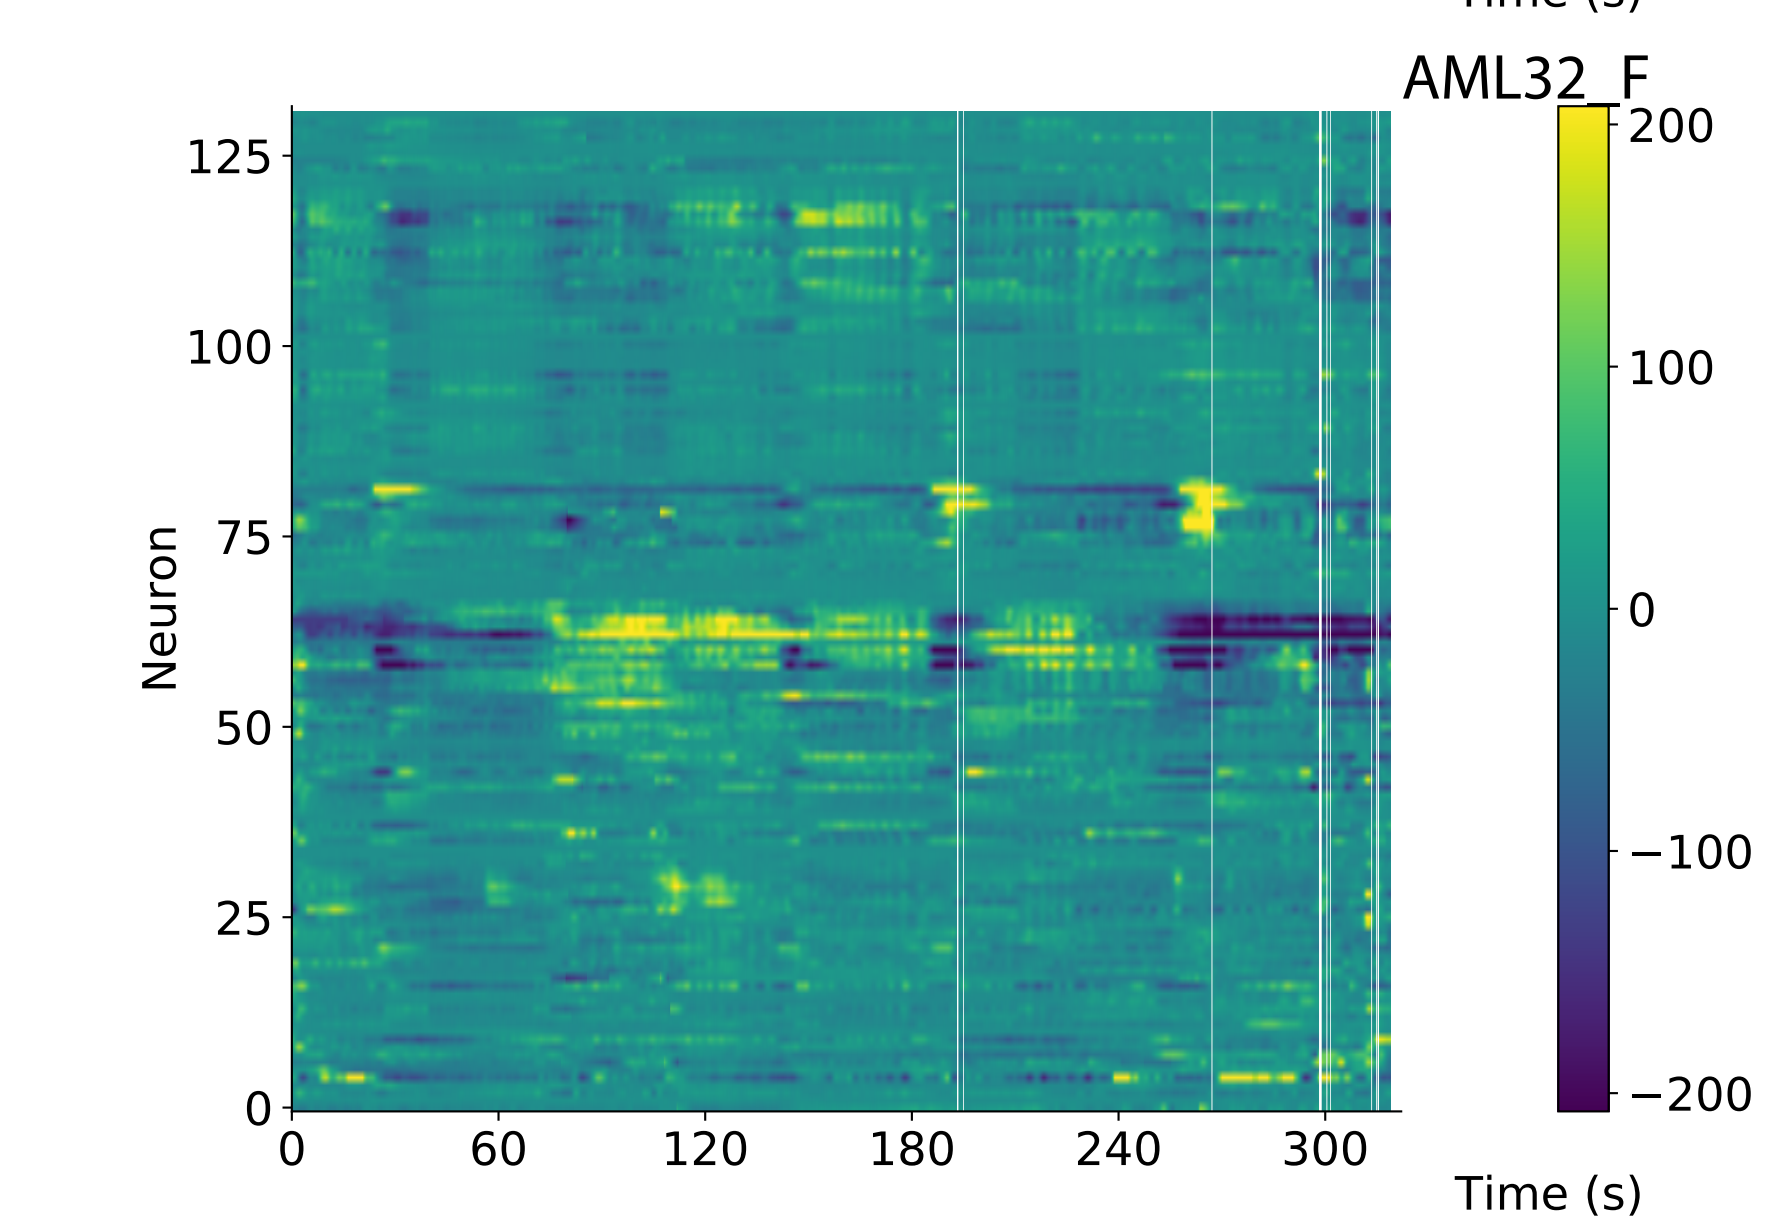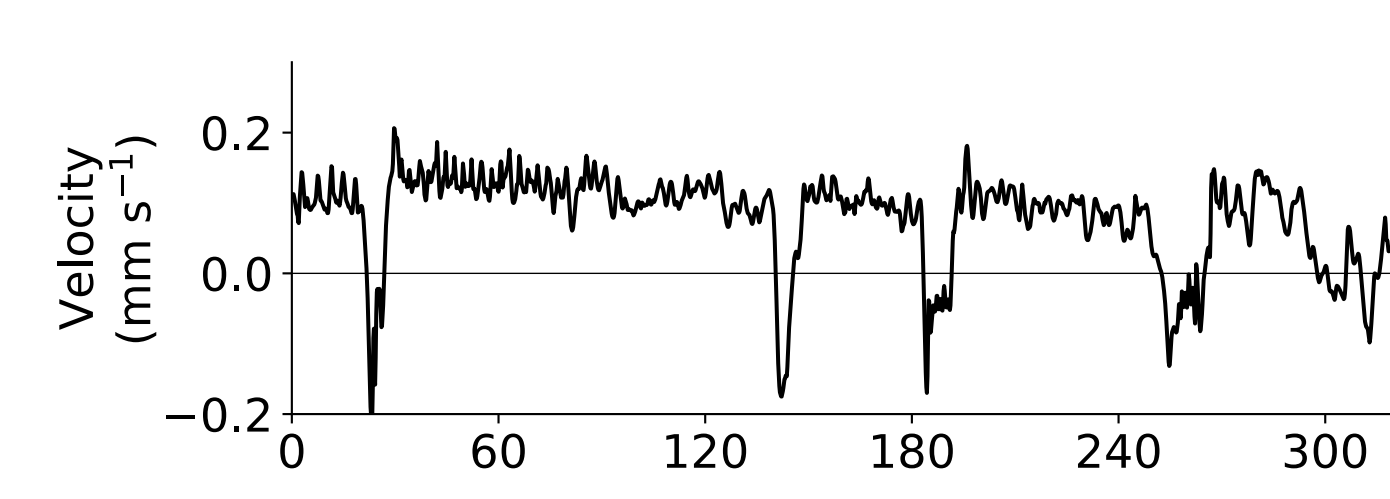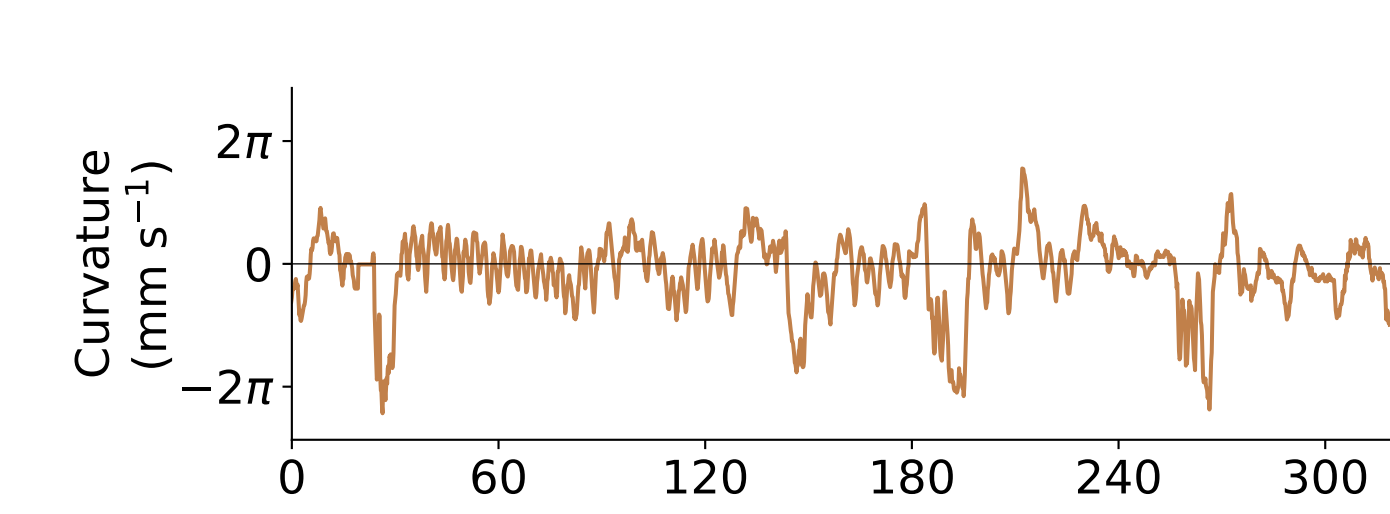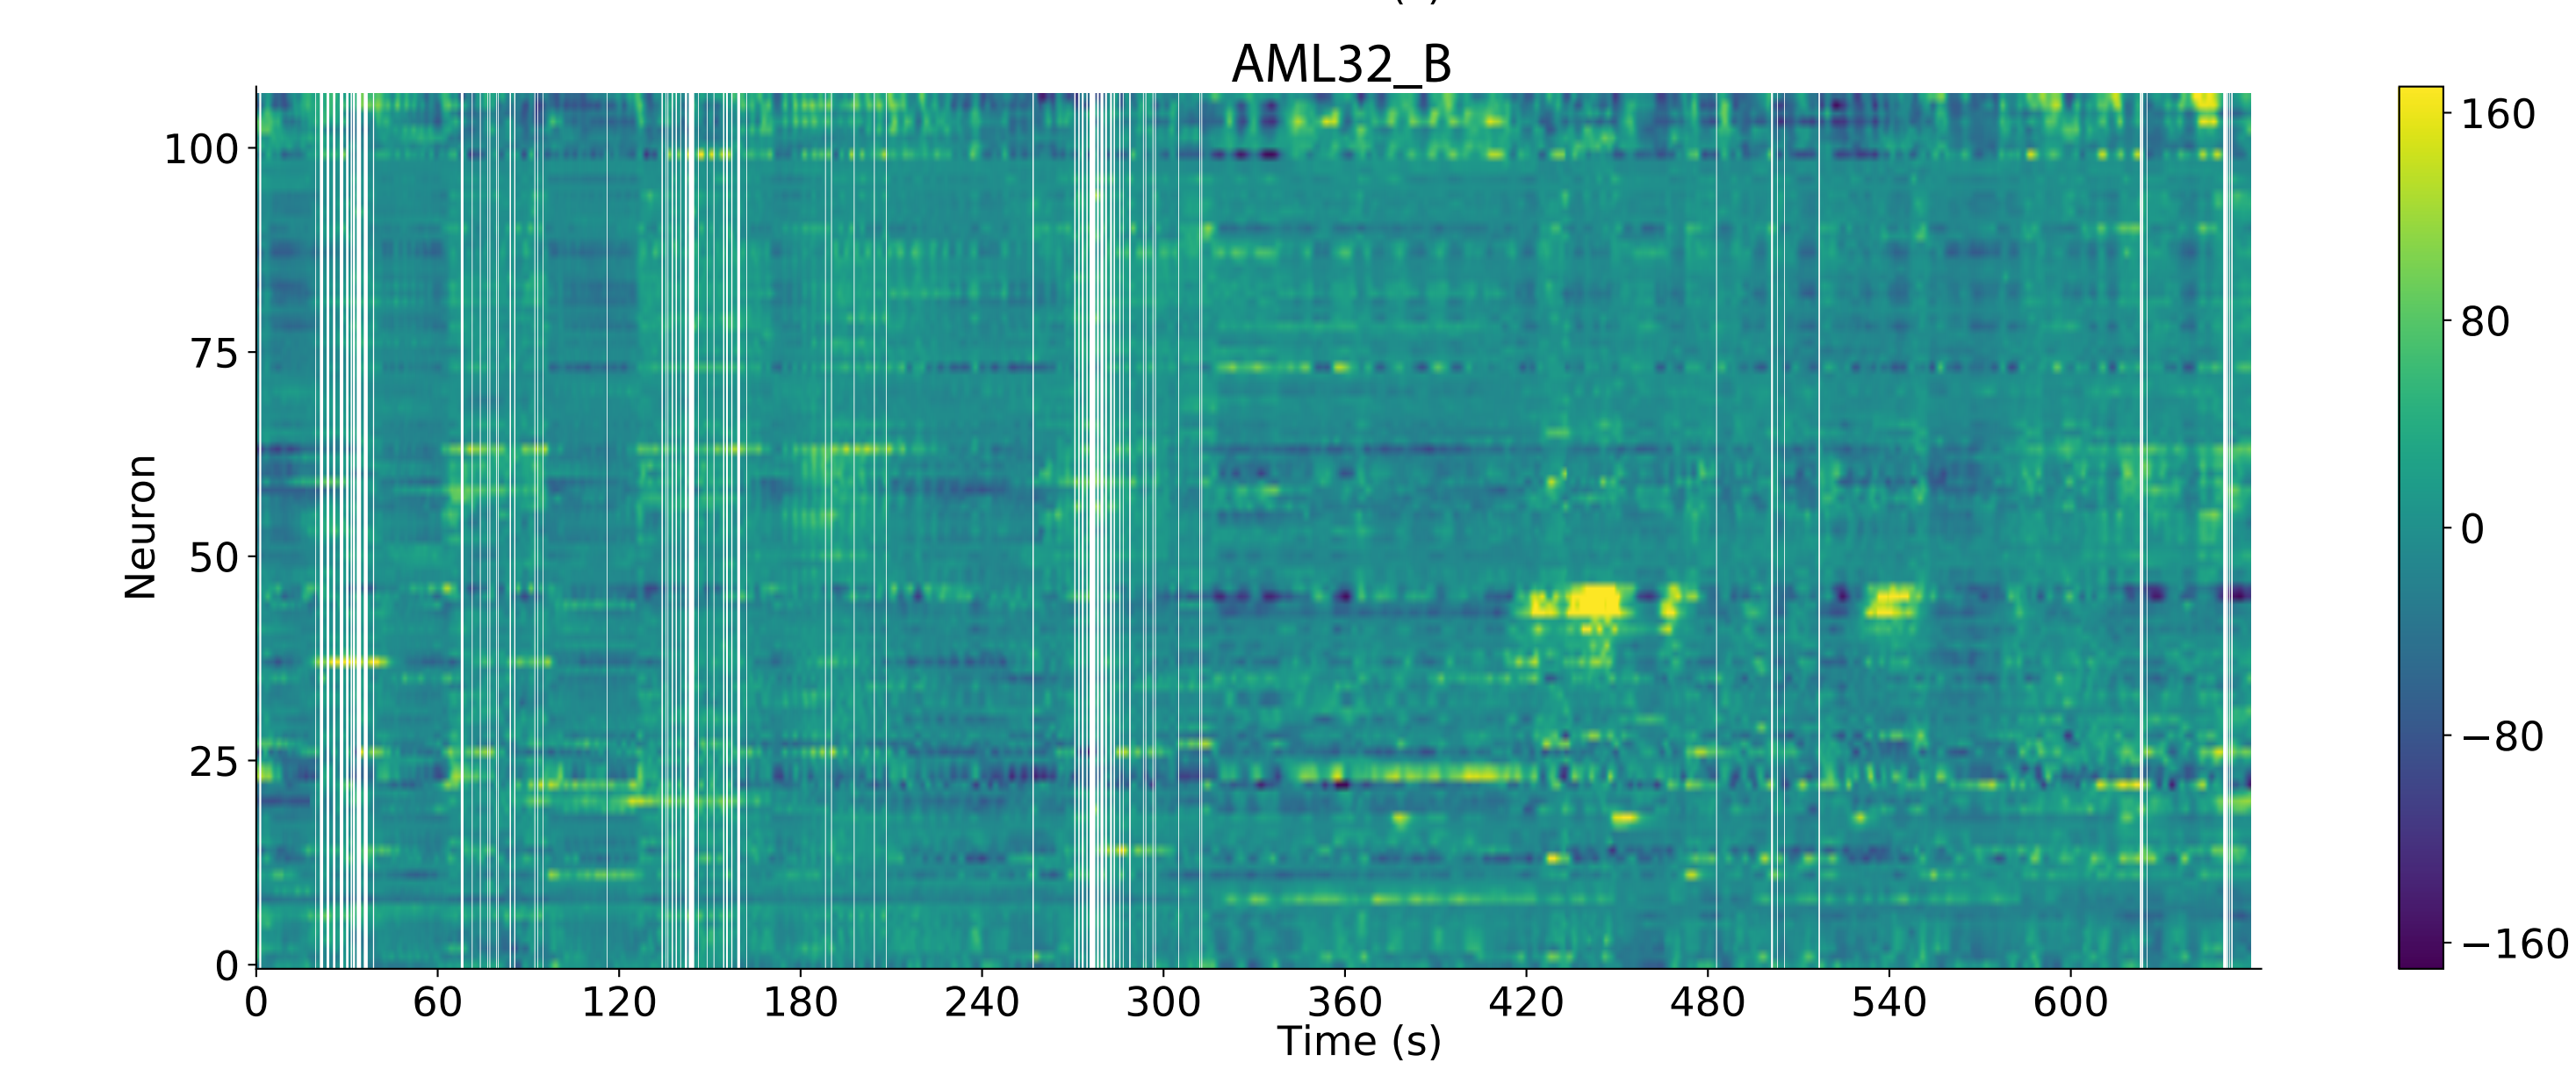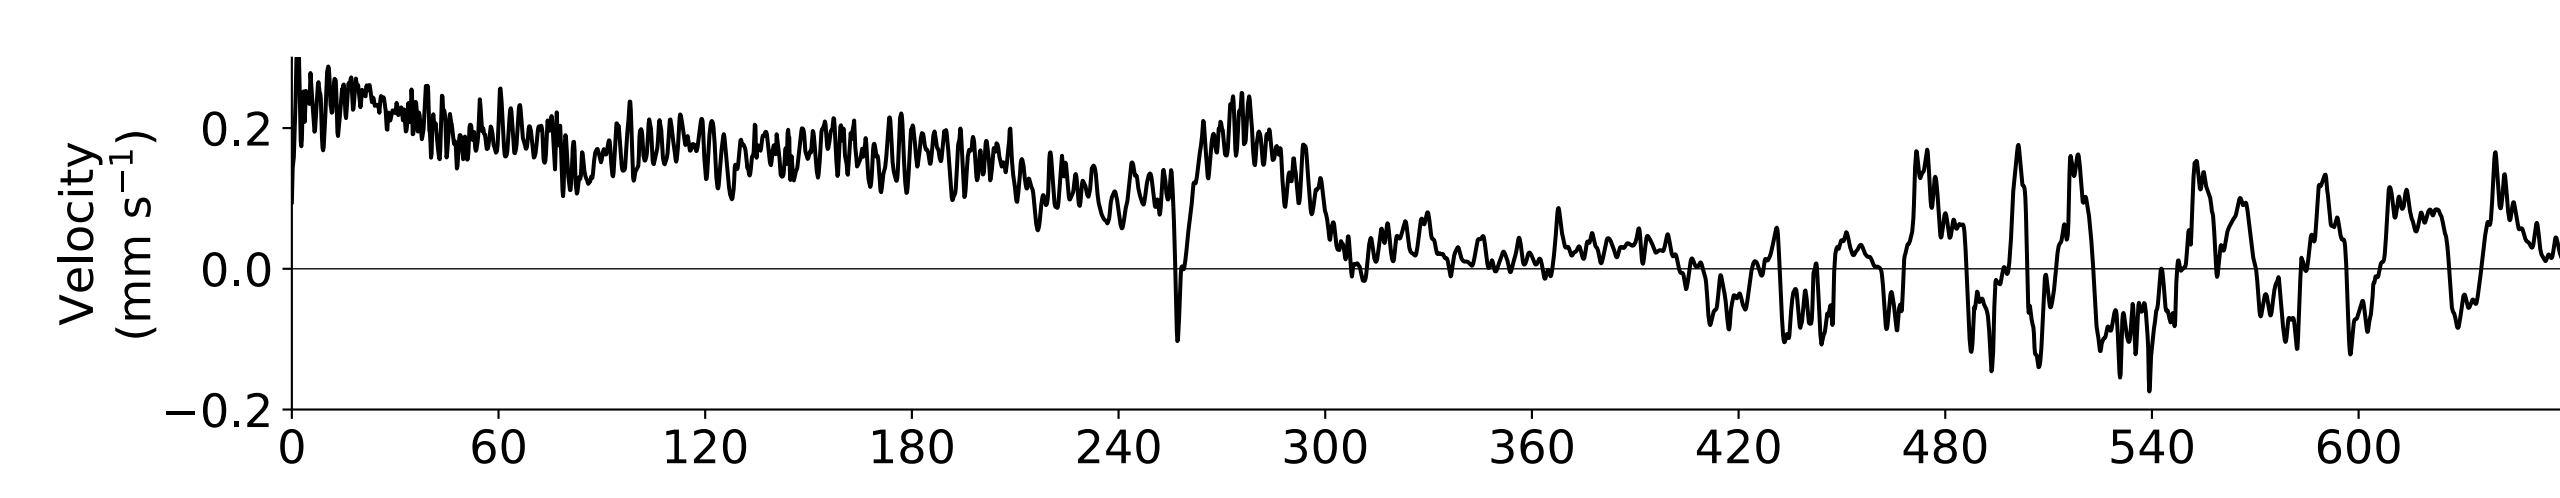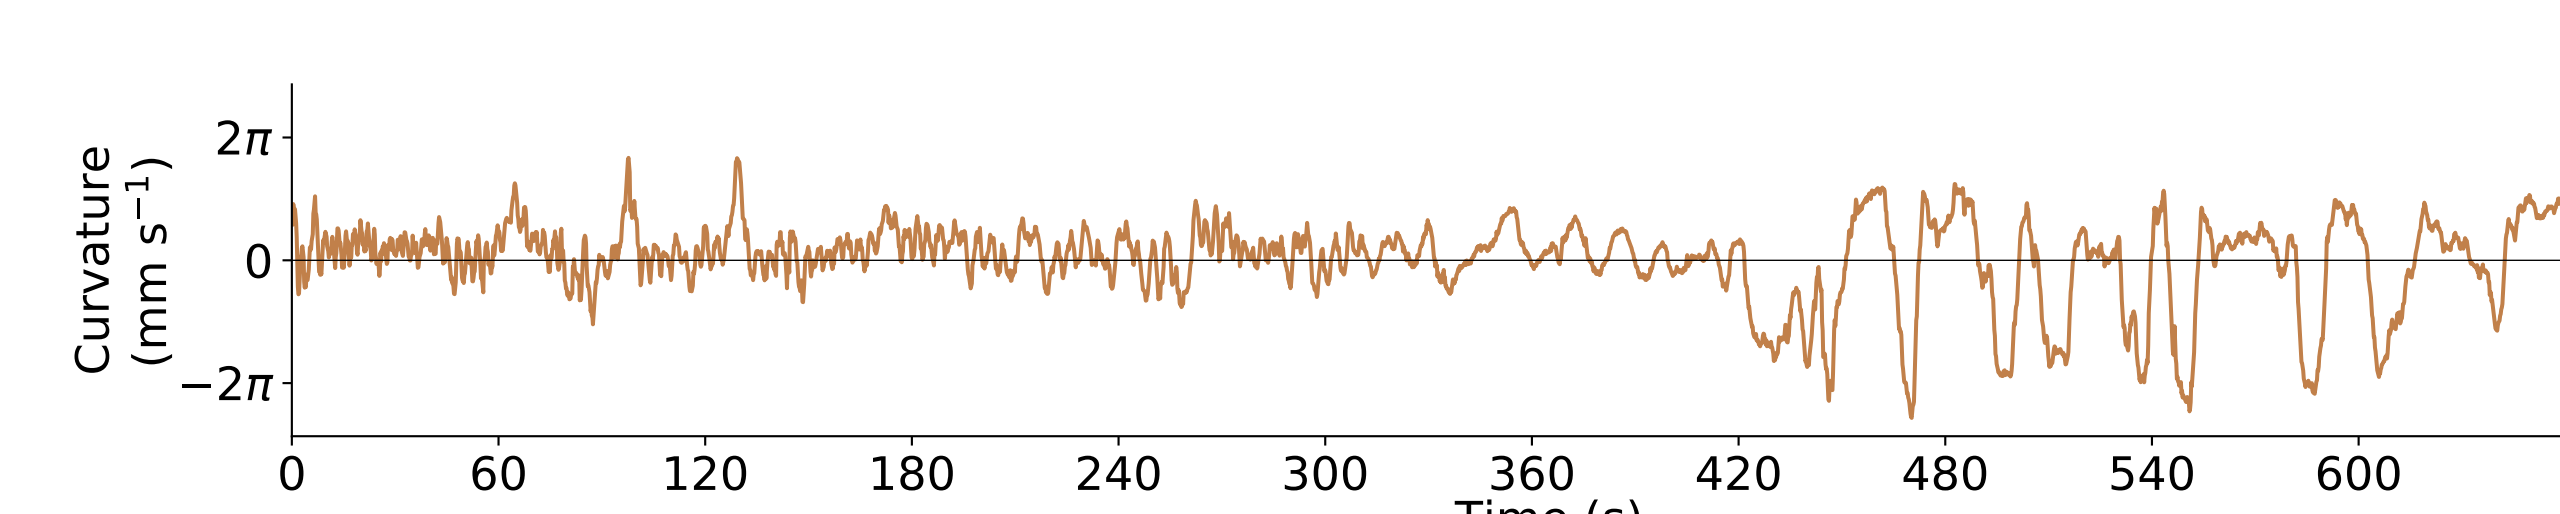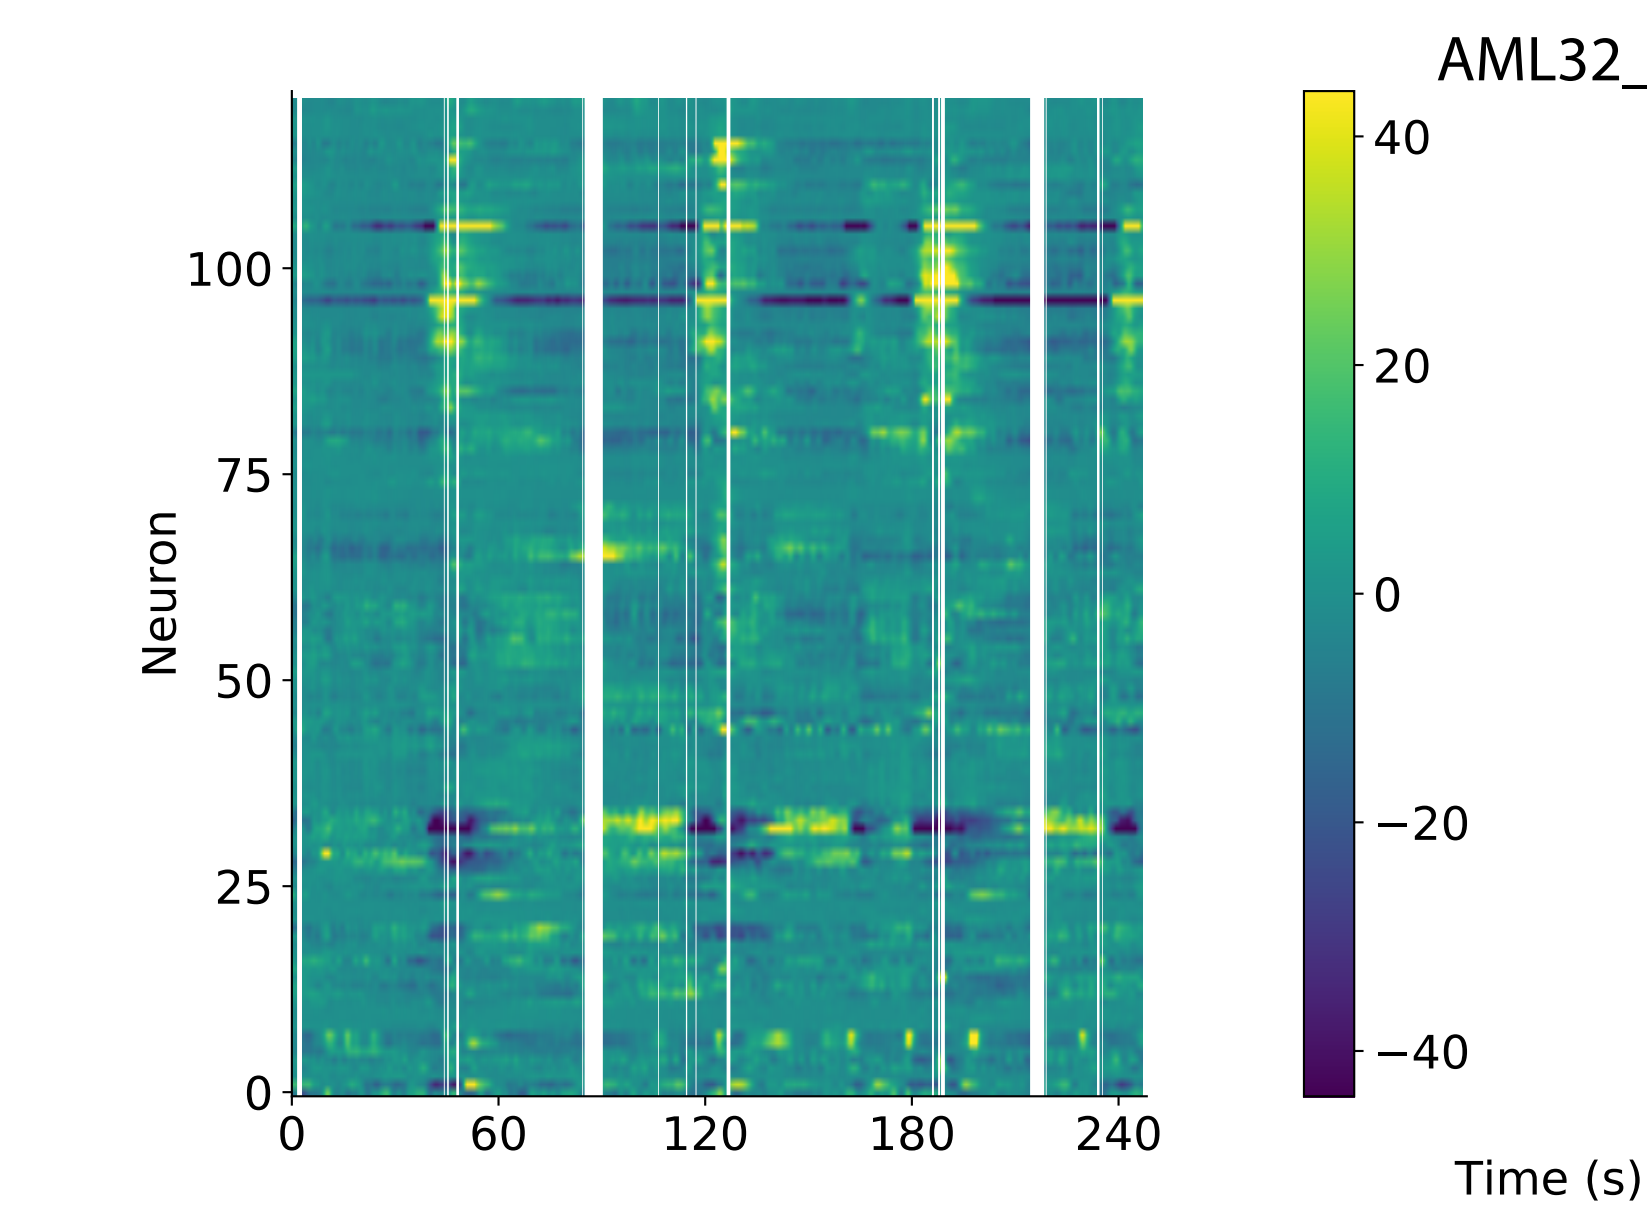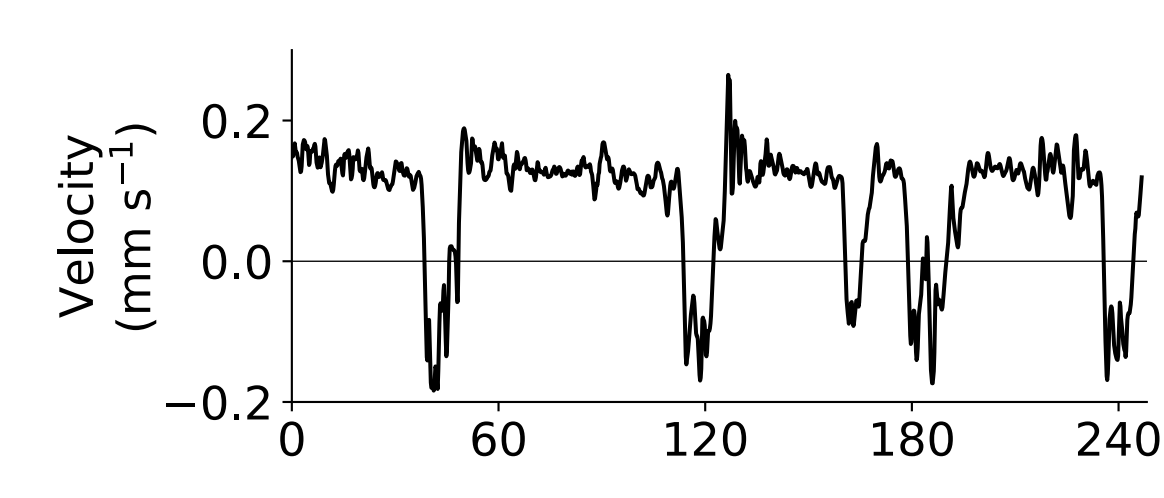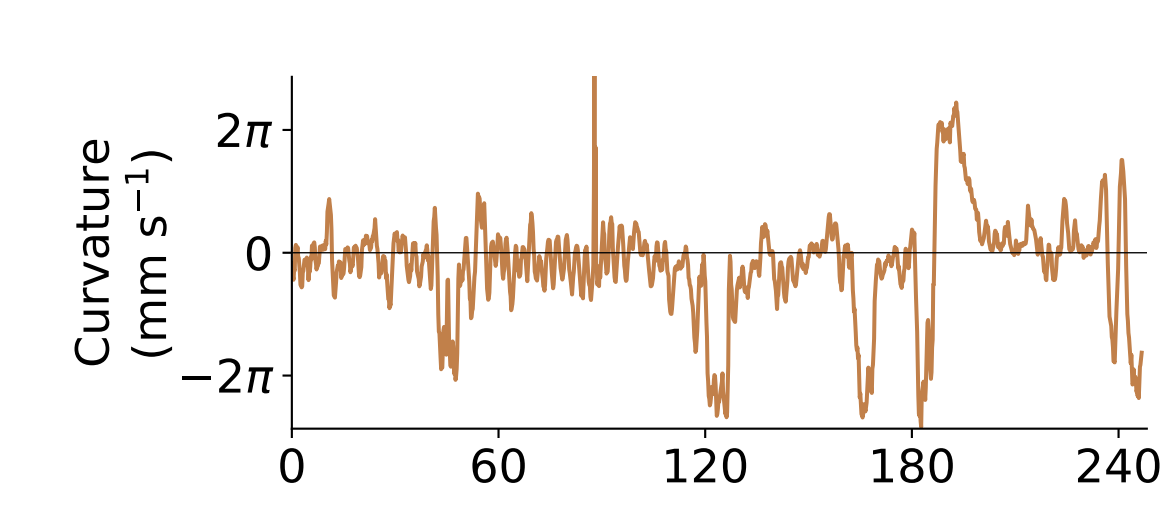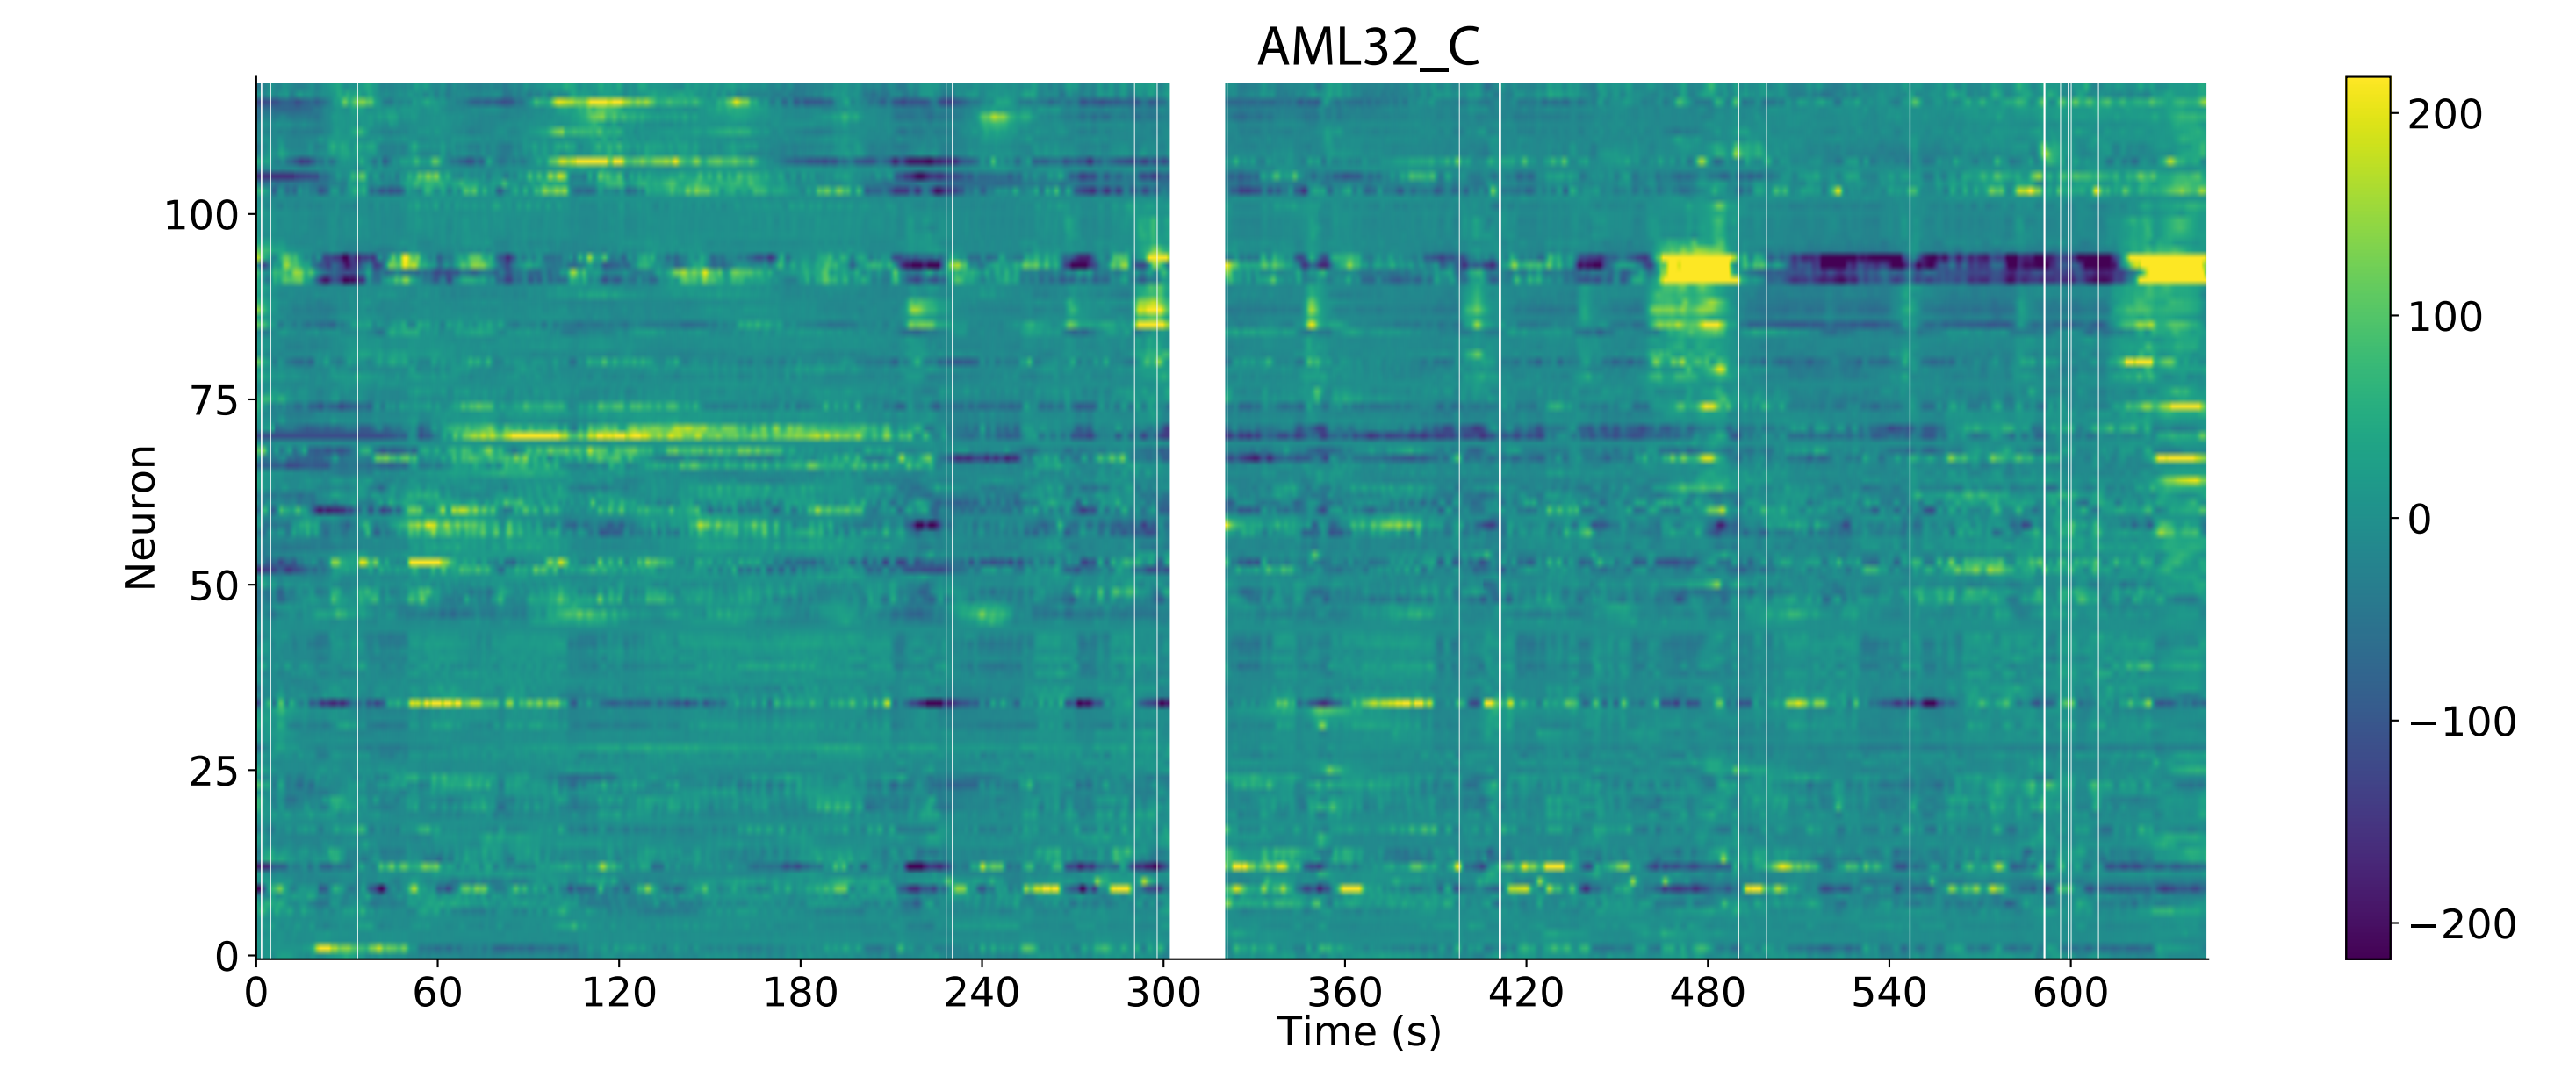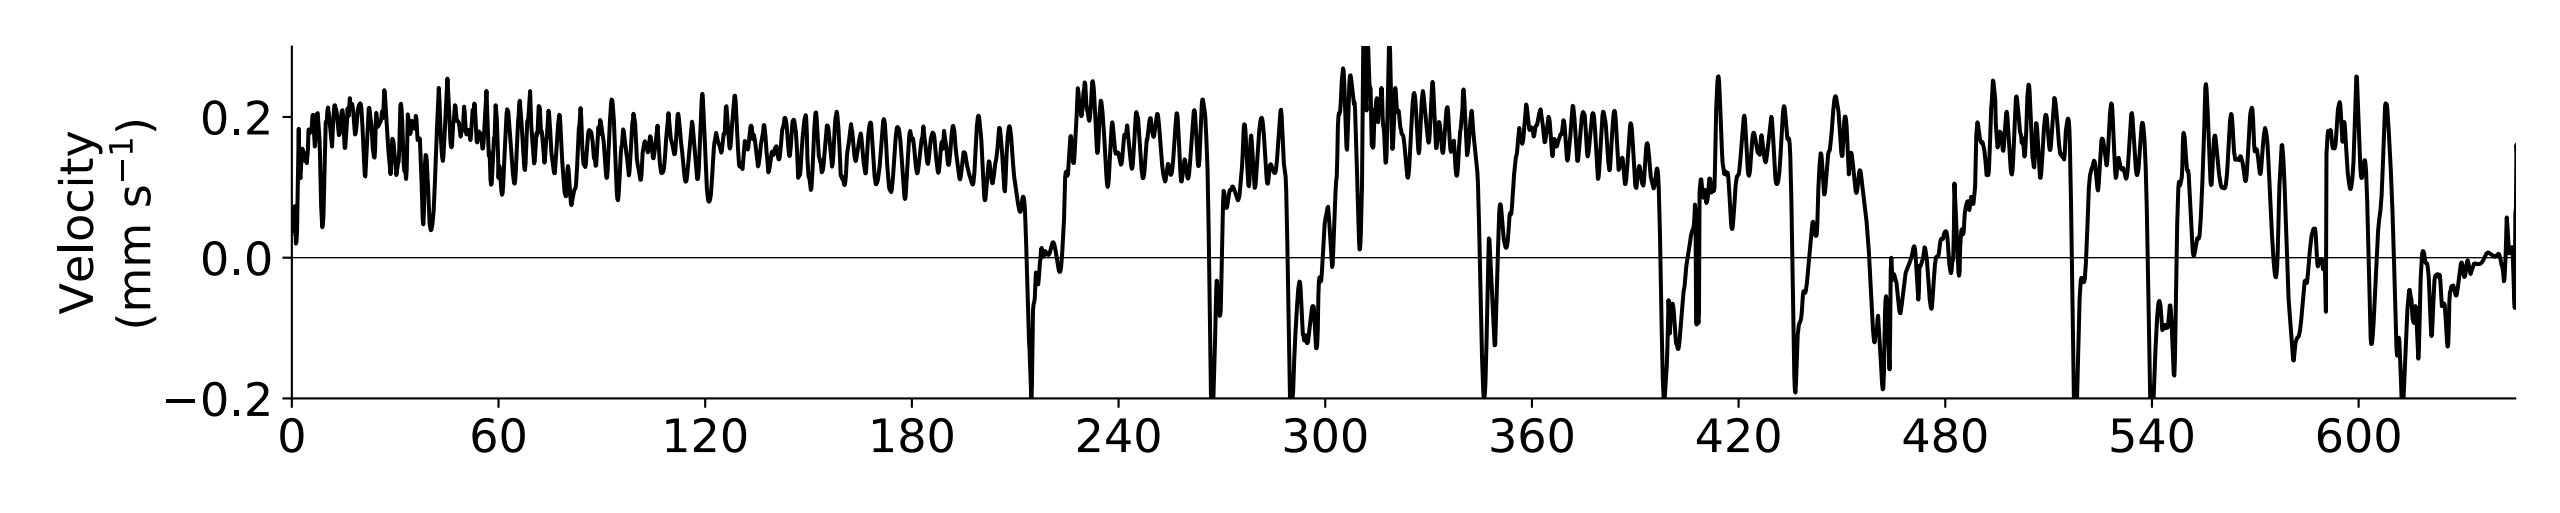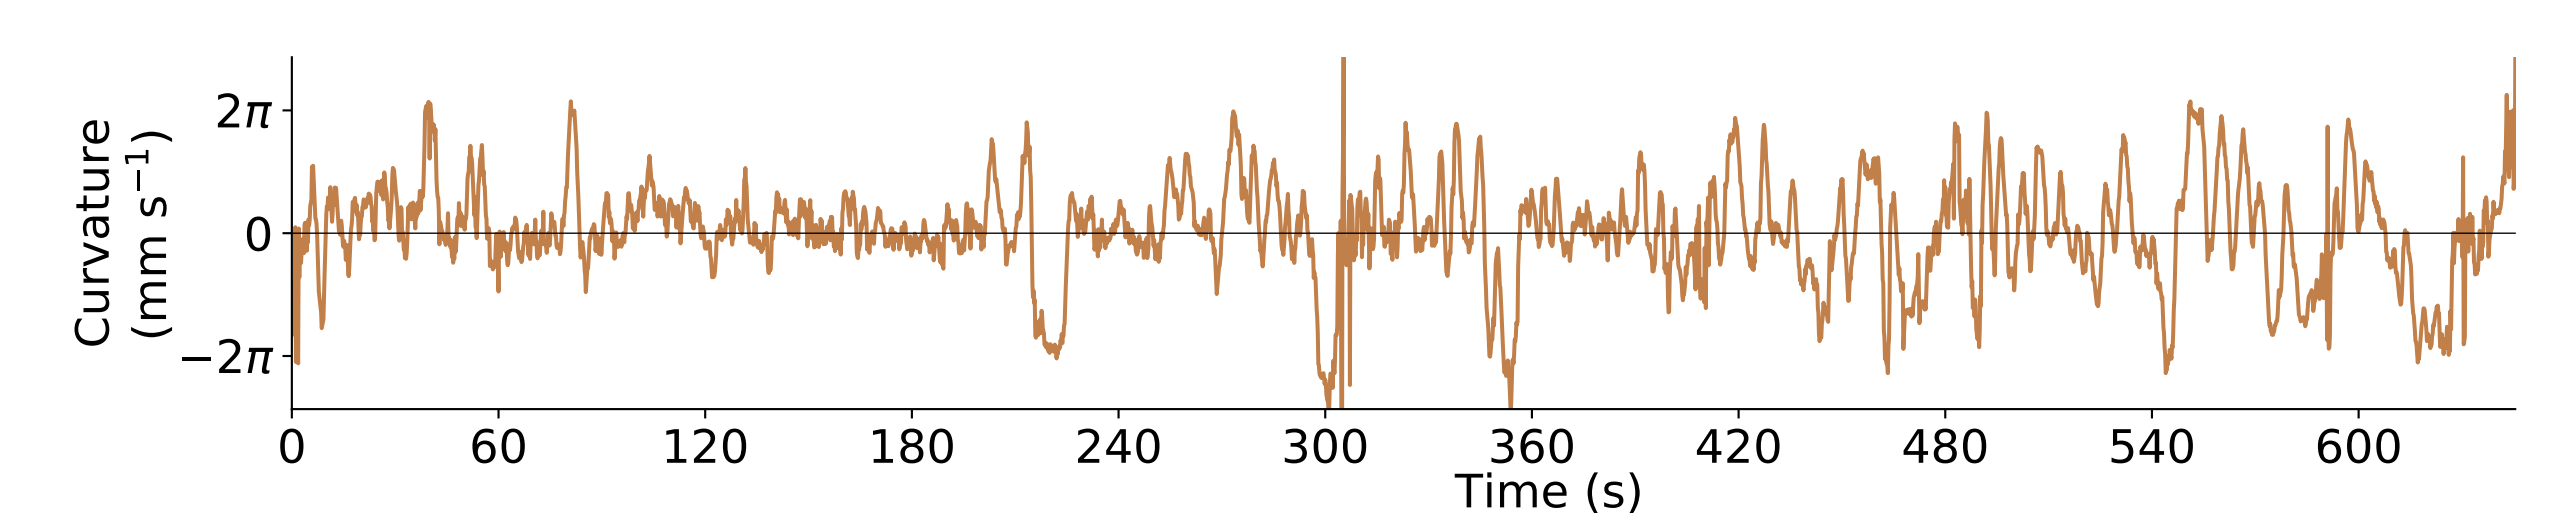

Supplement: supp [file elife-66135-supp-v1.zip]

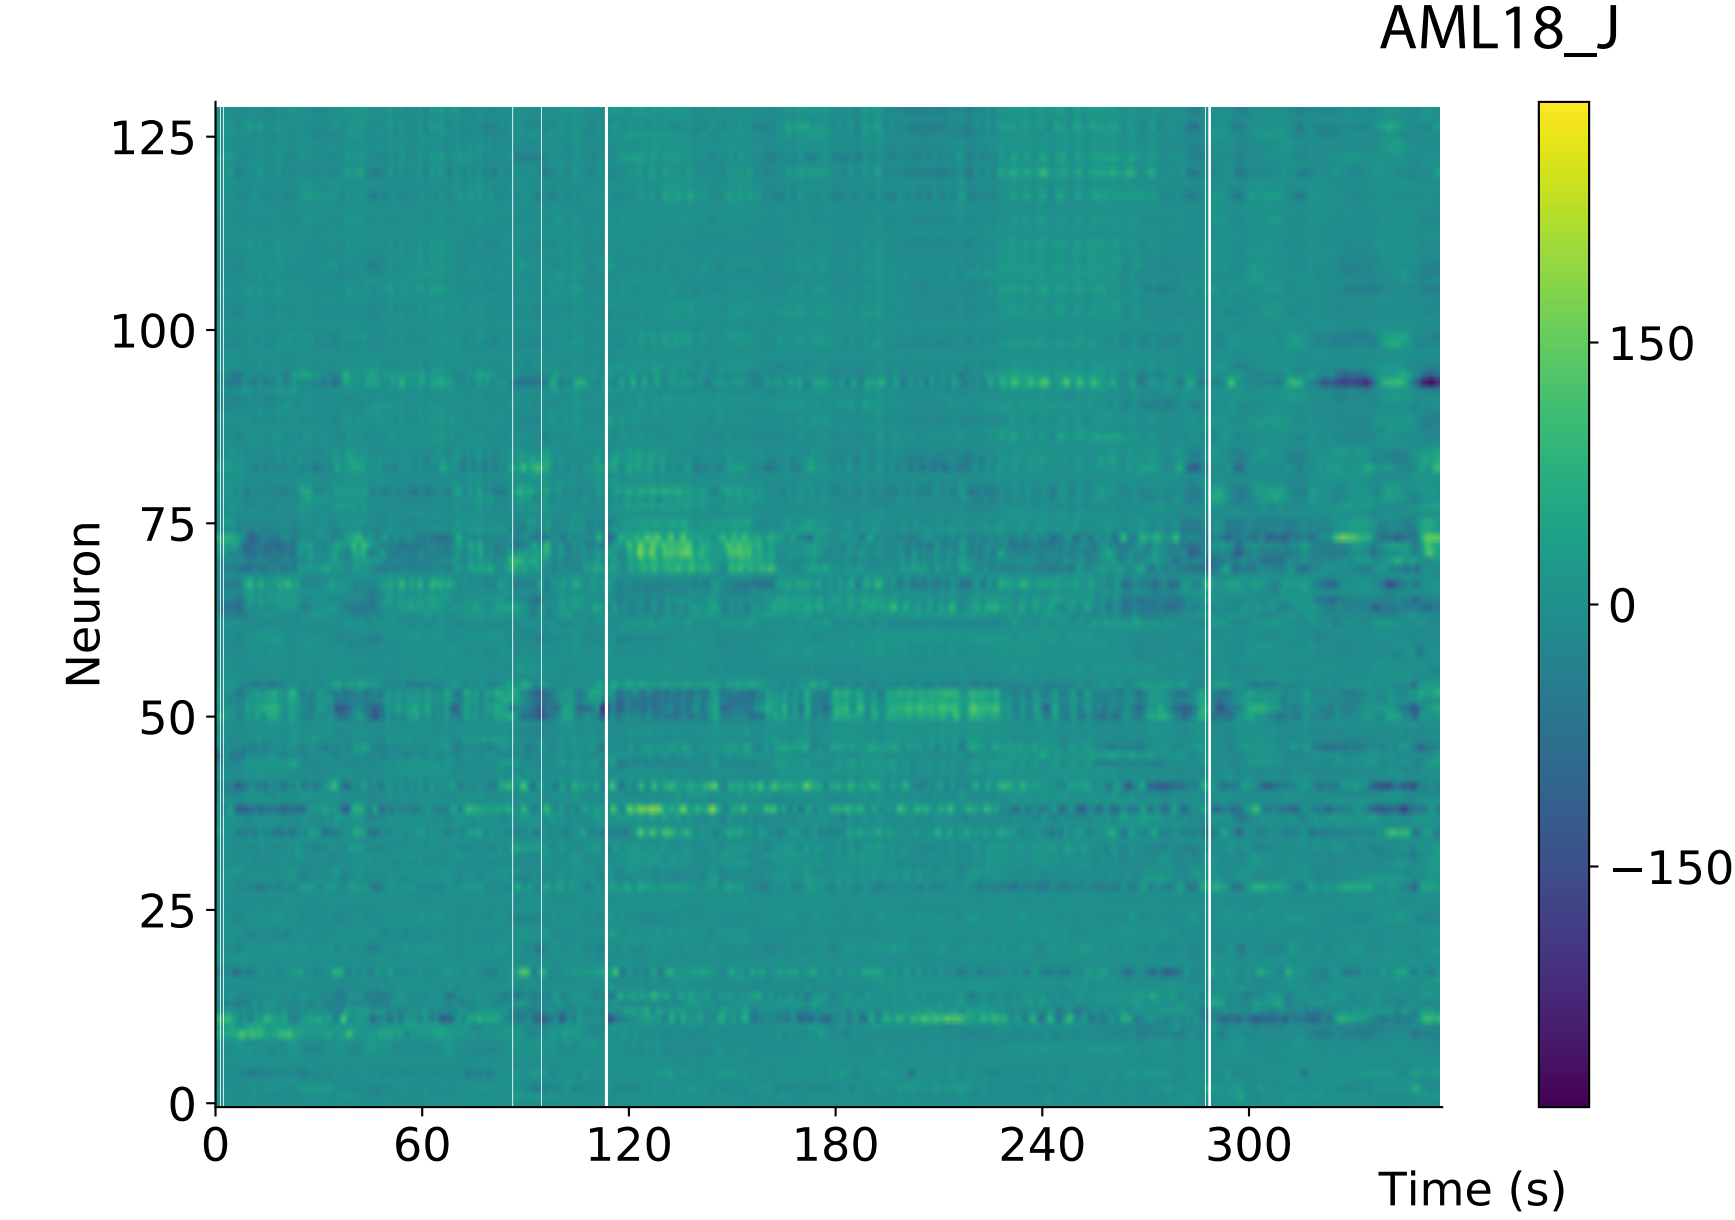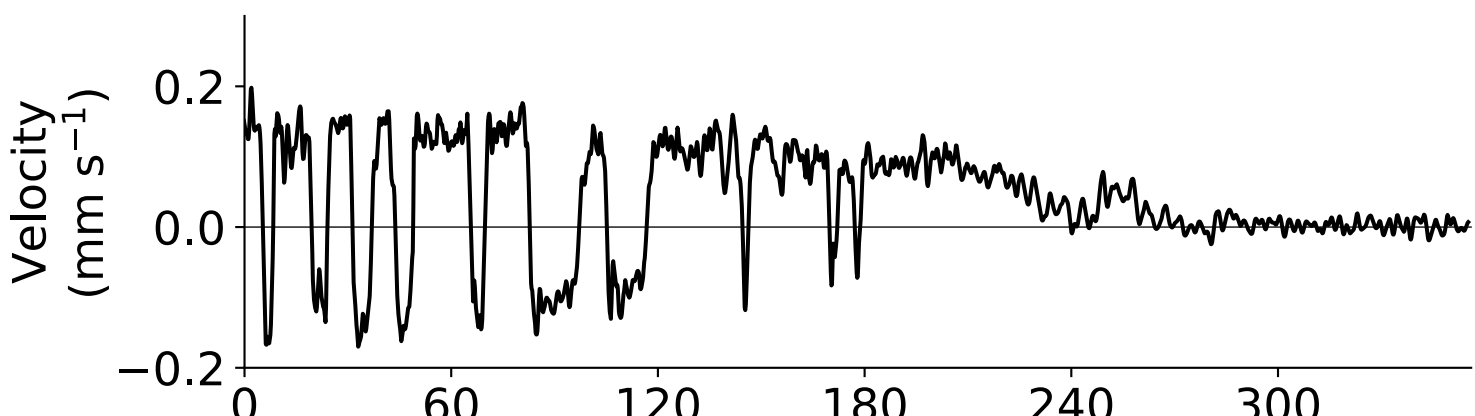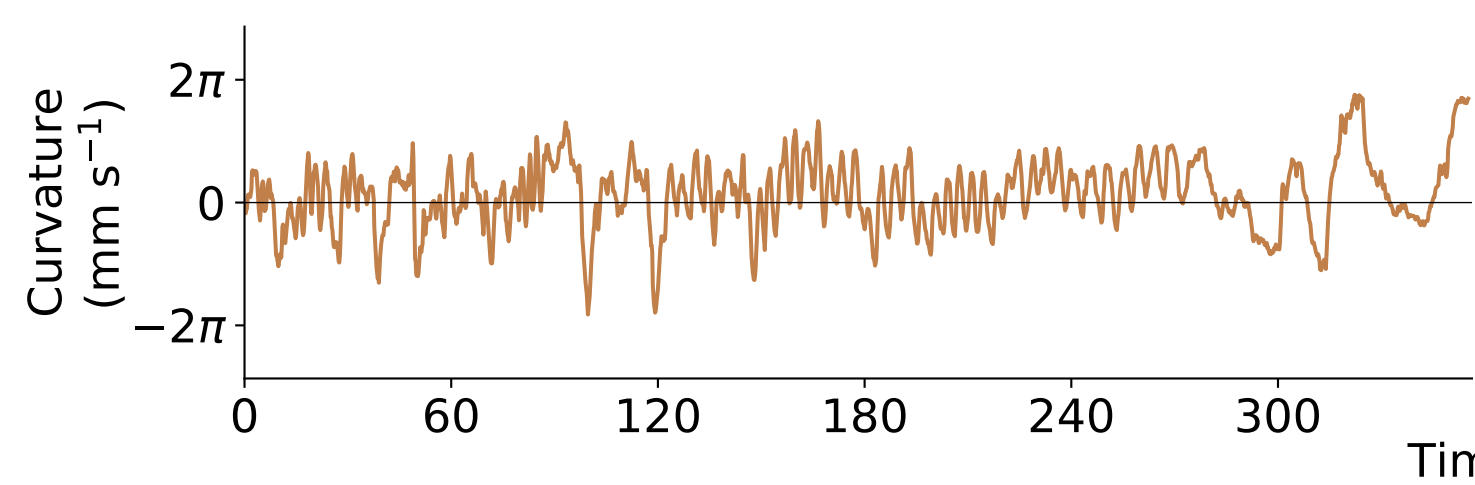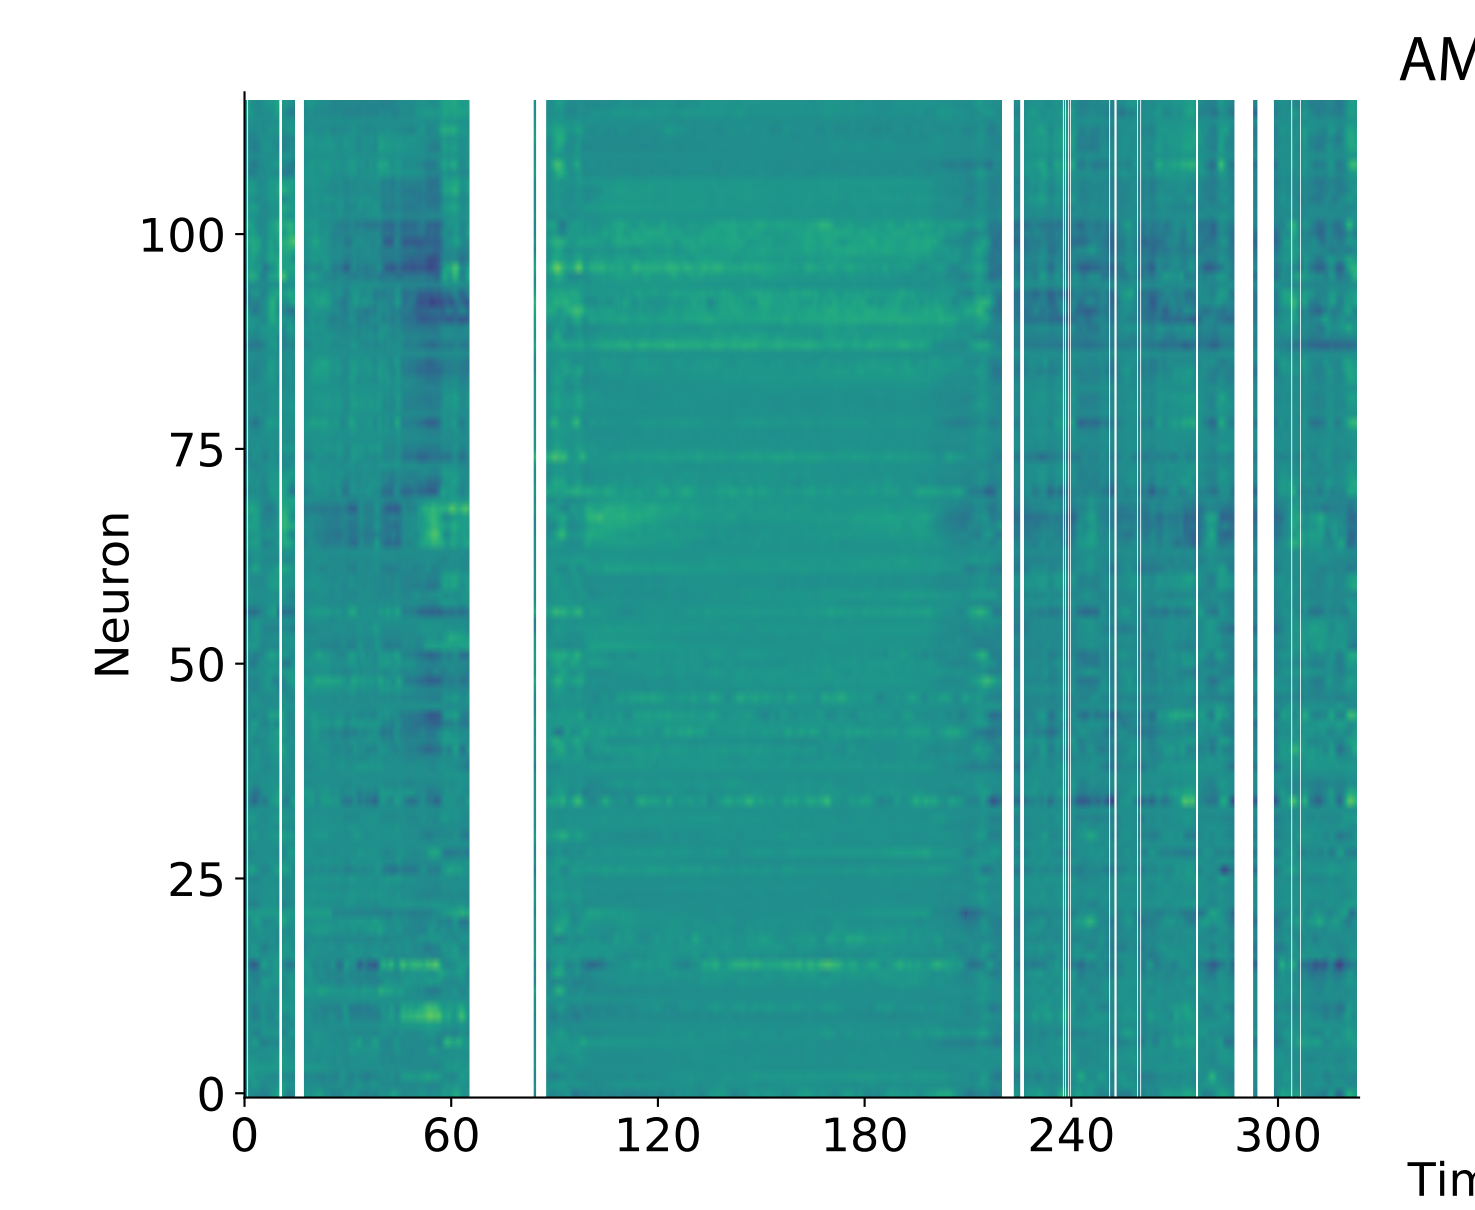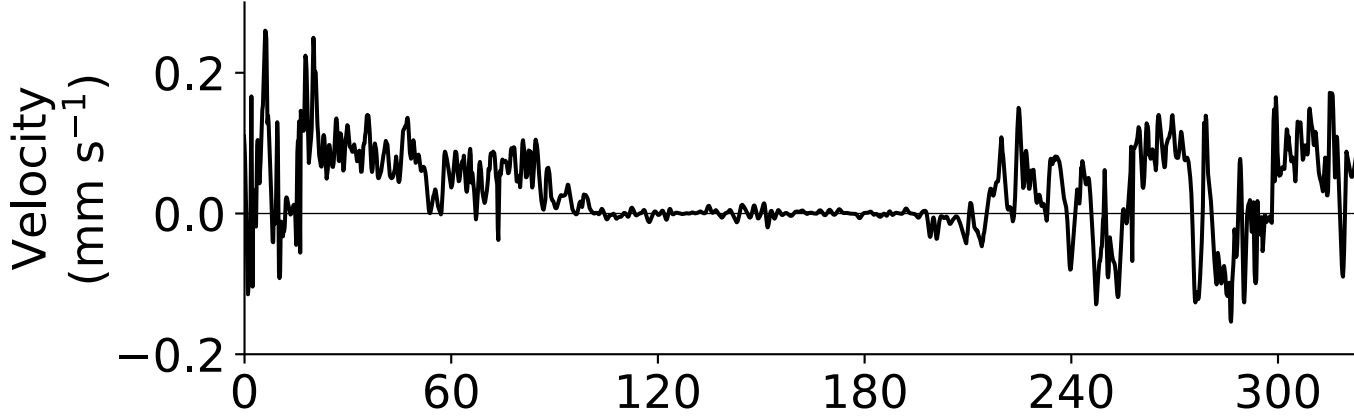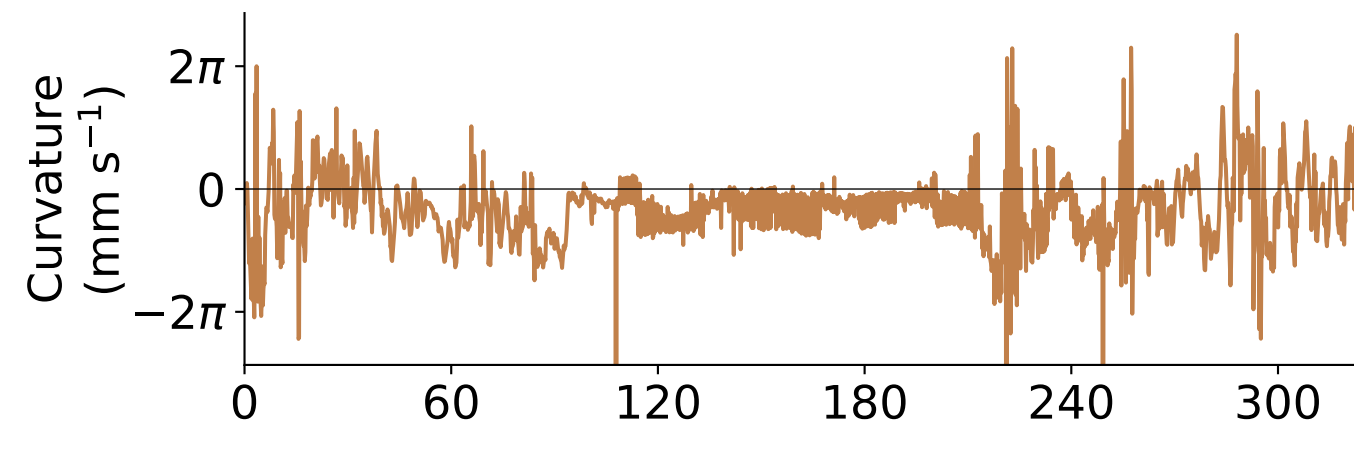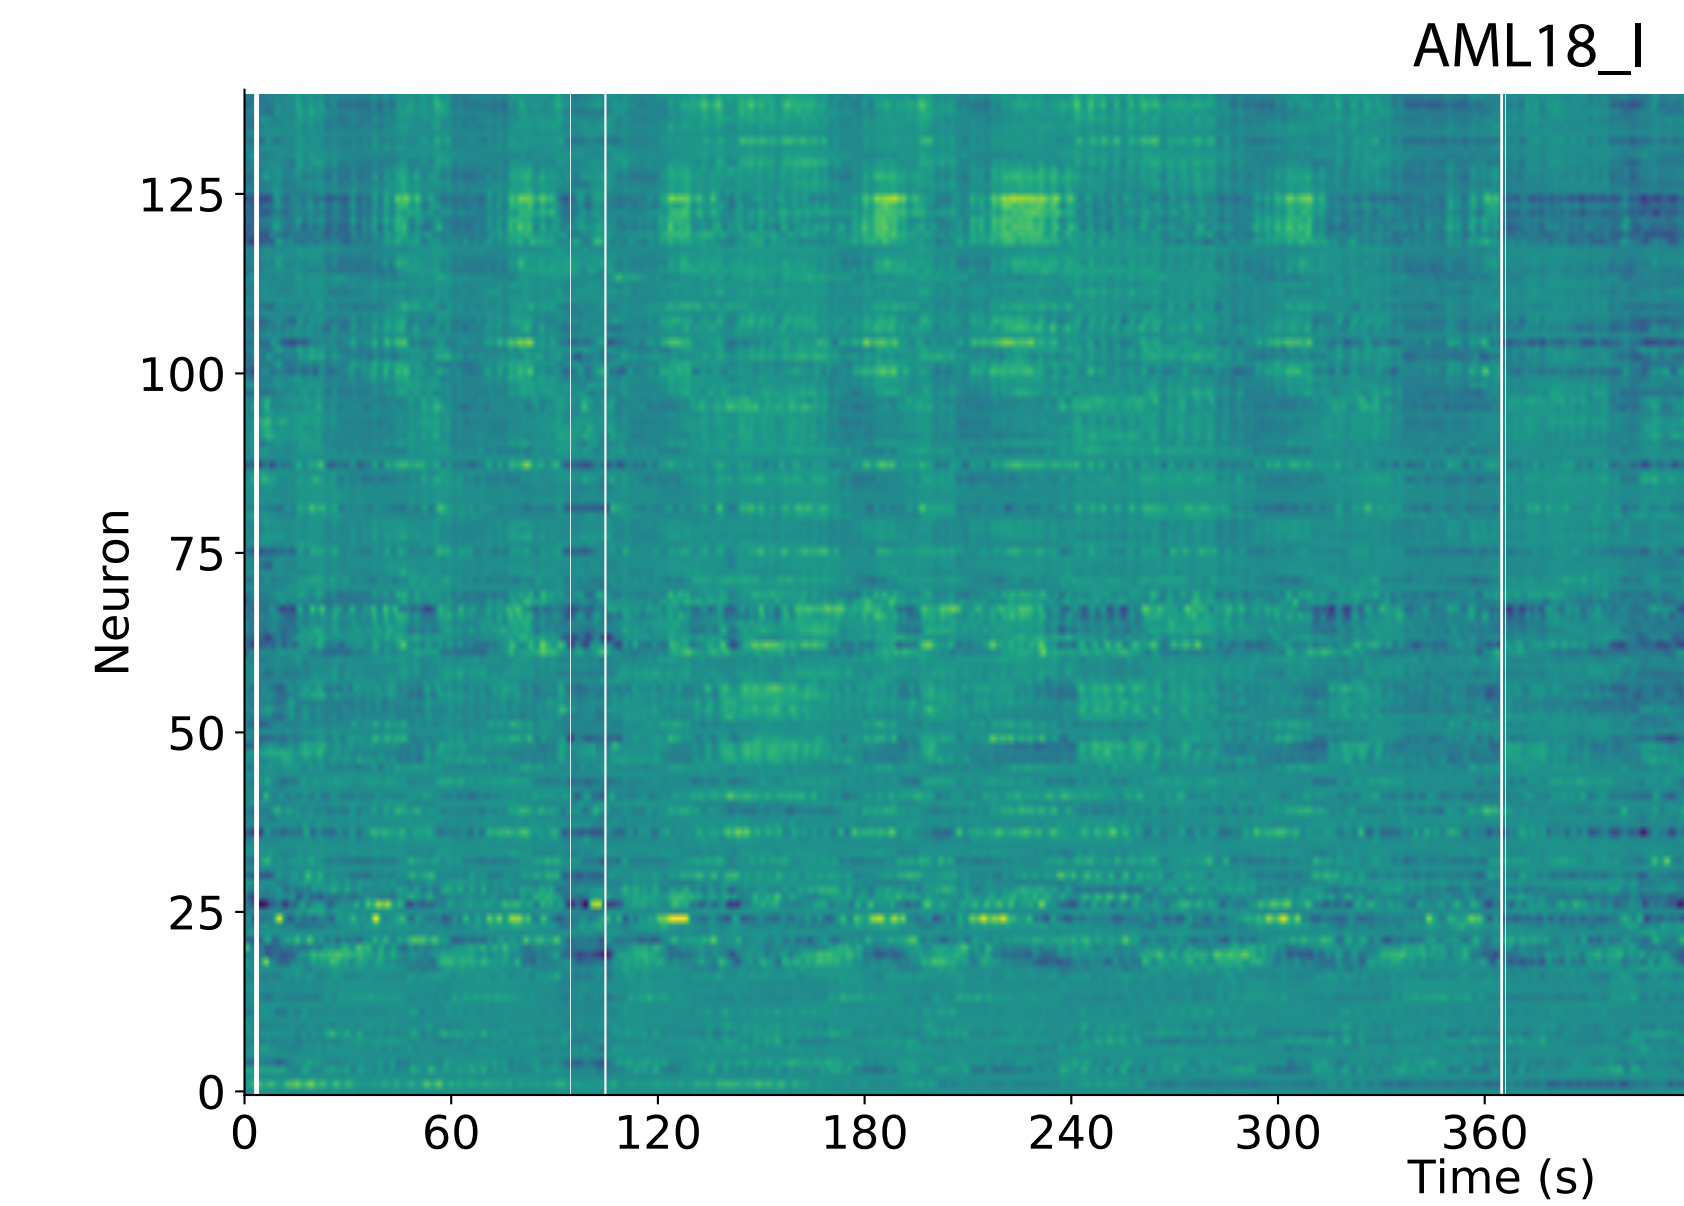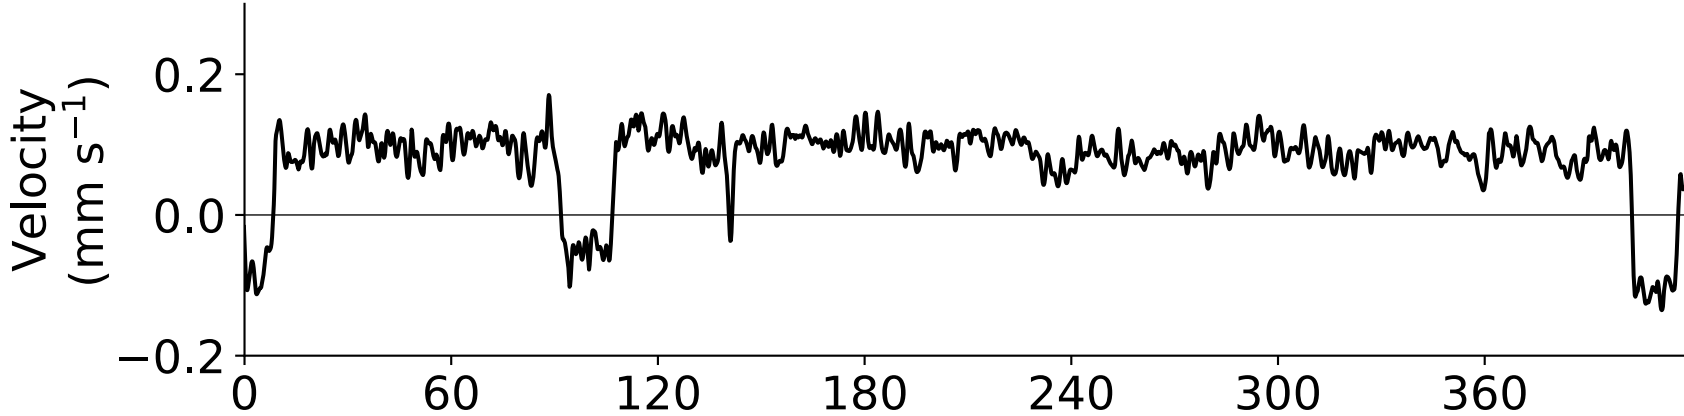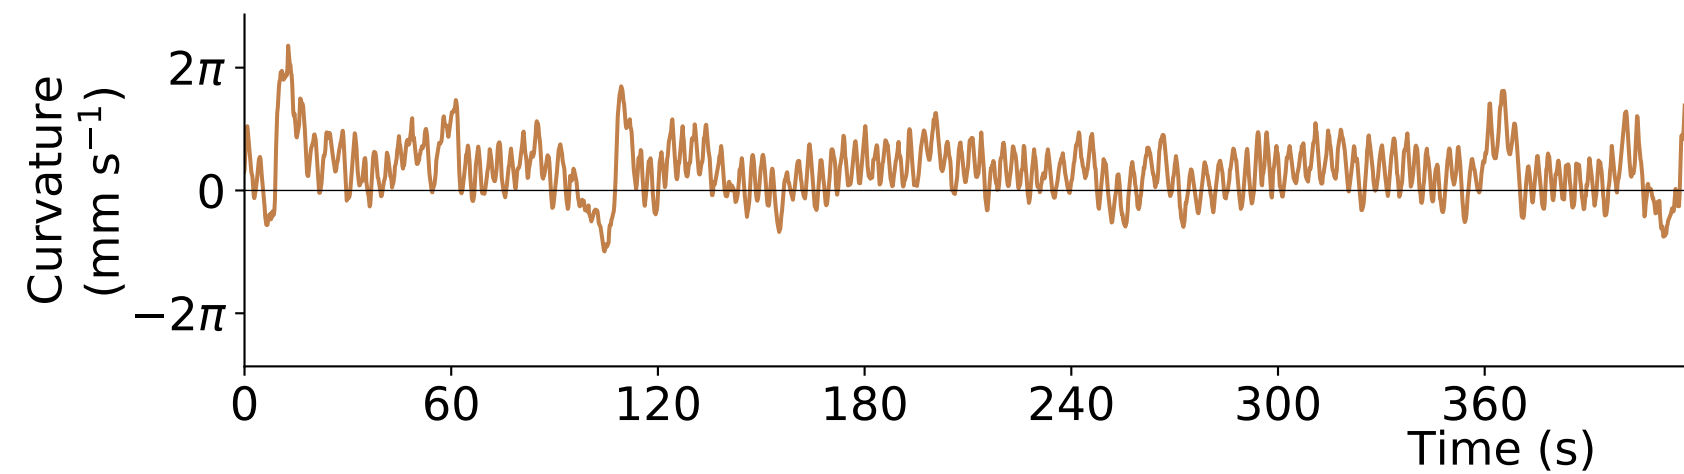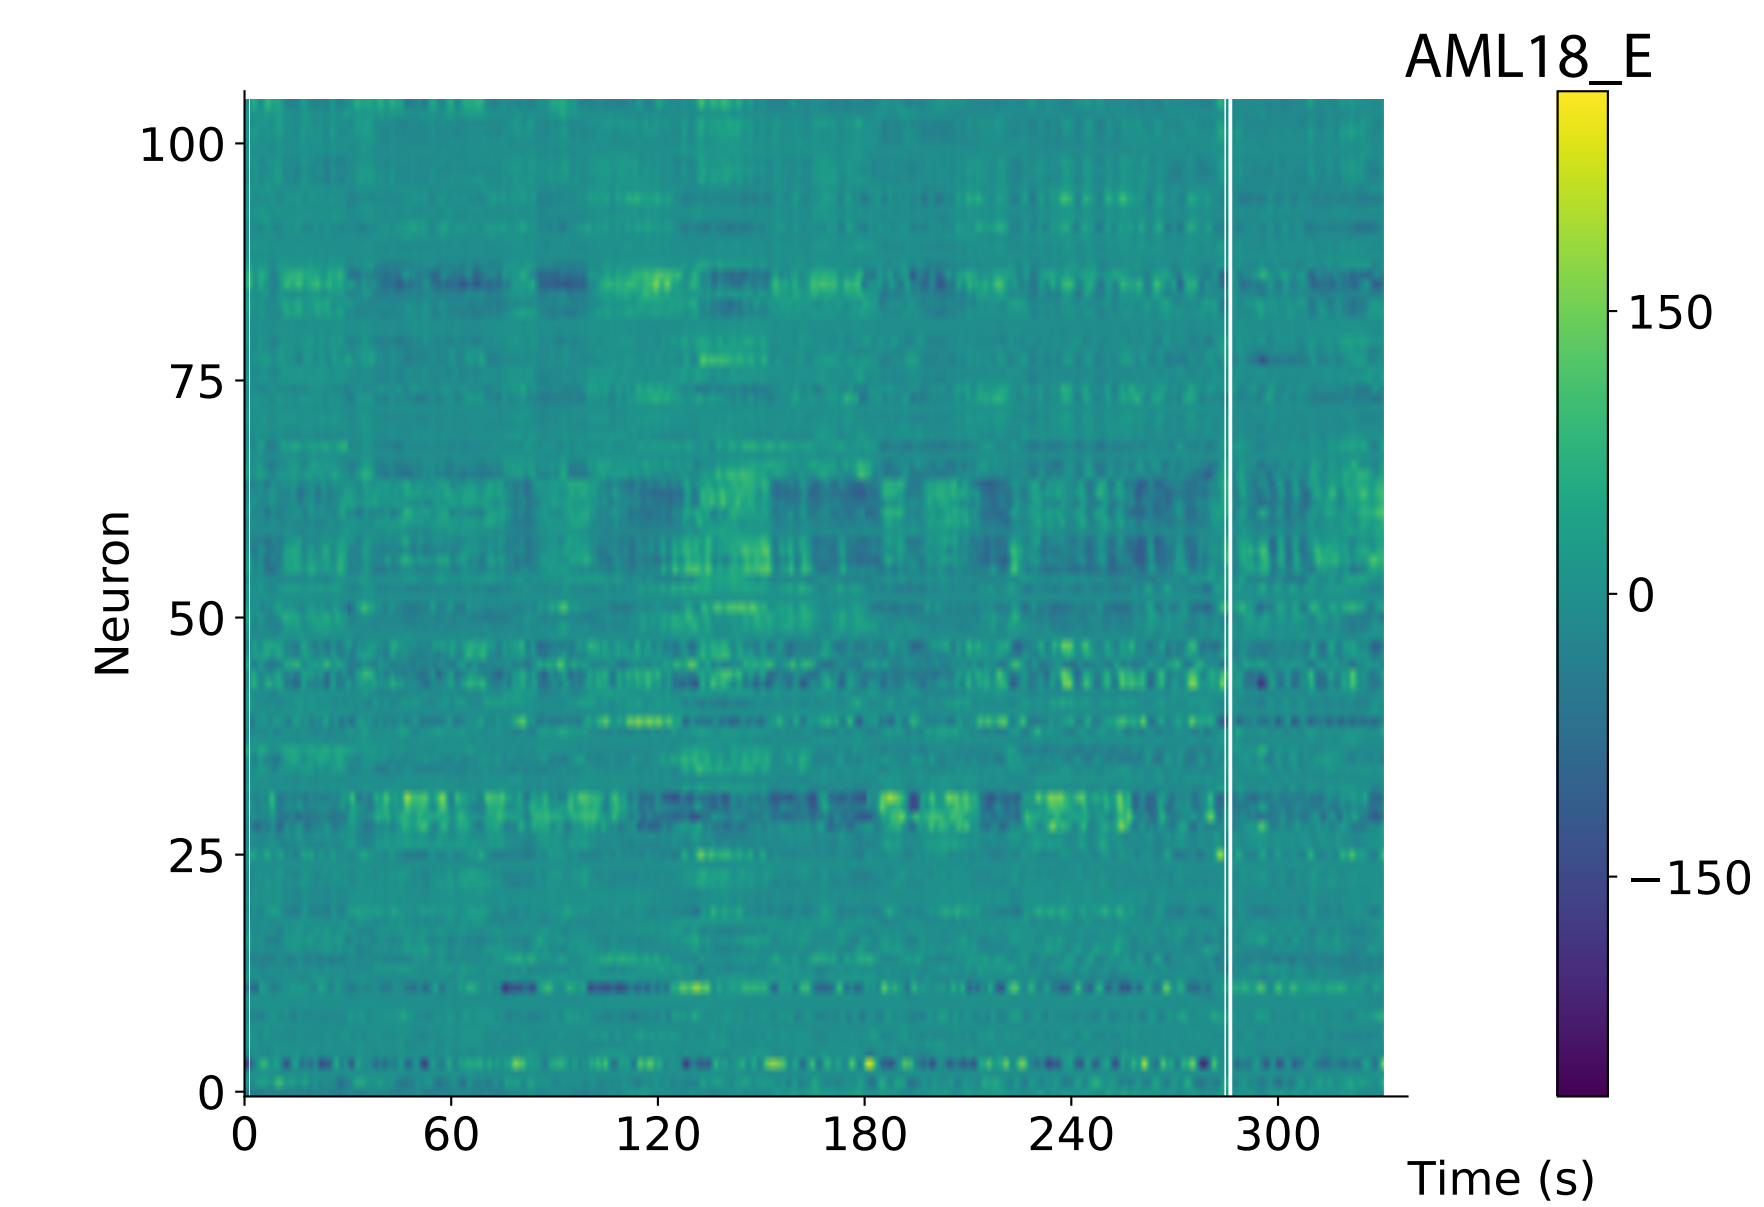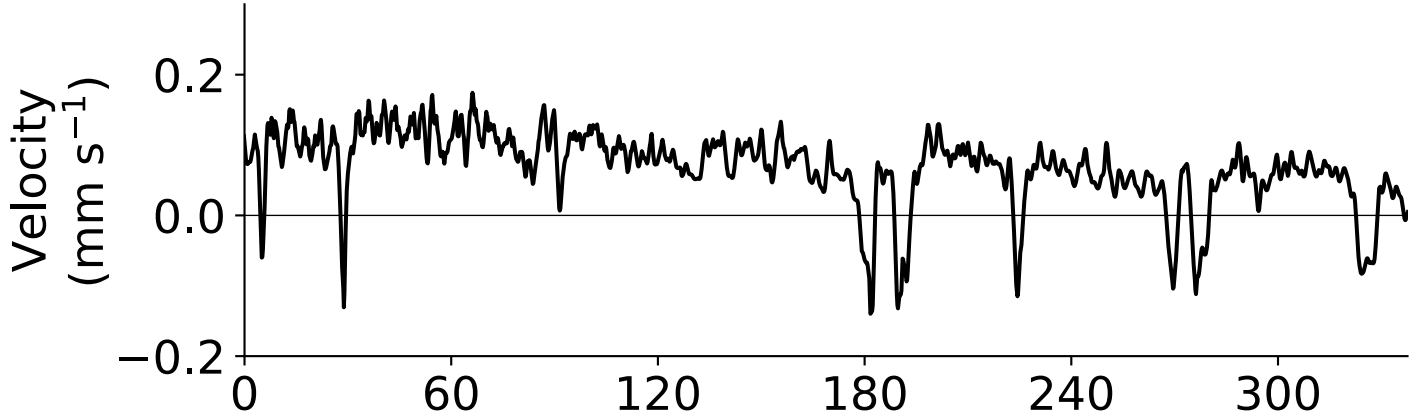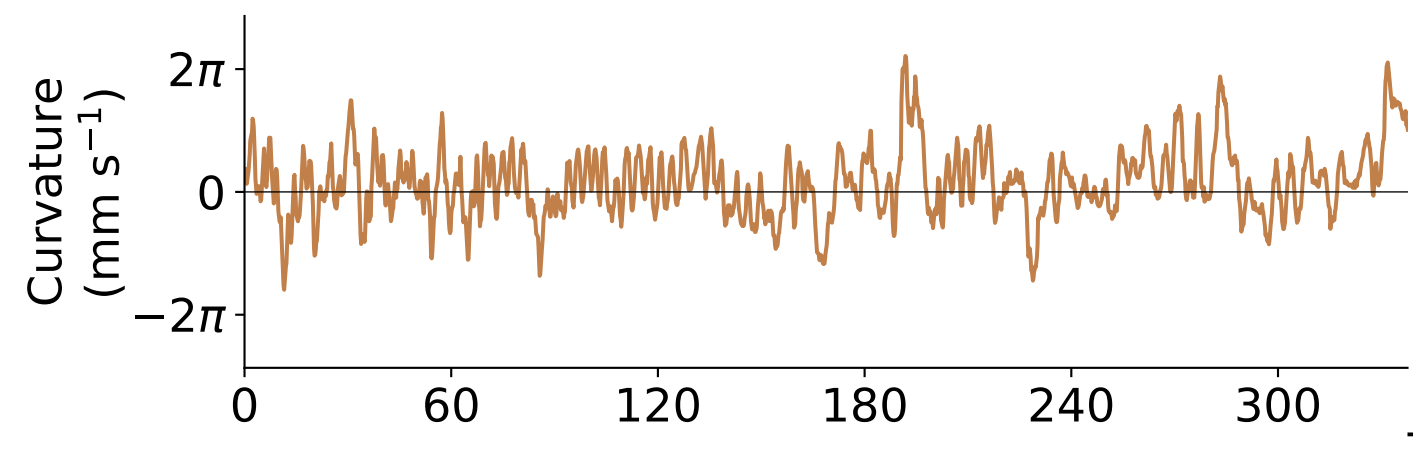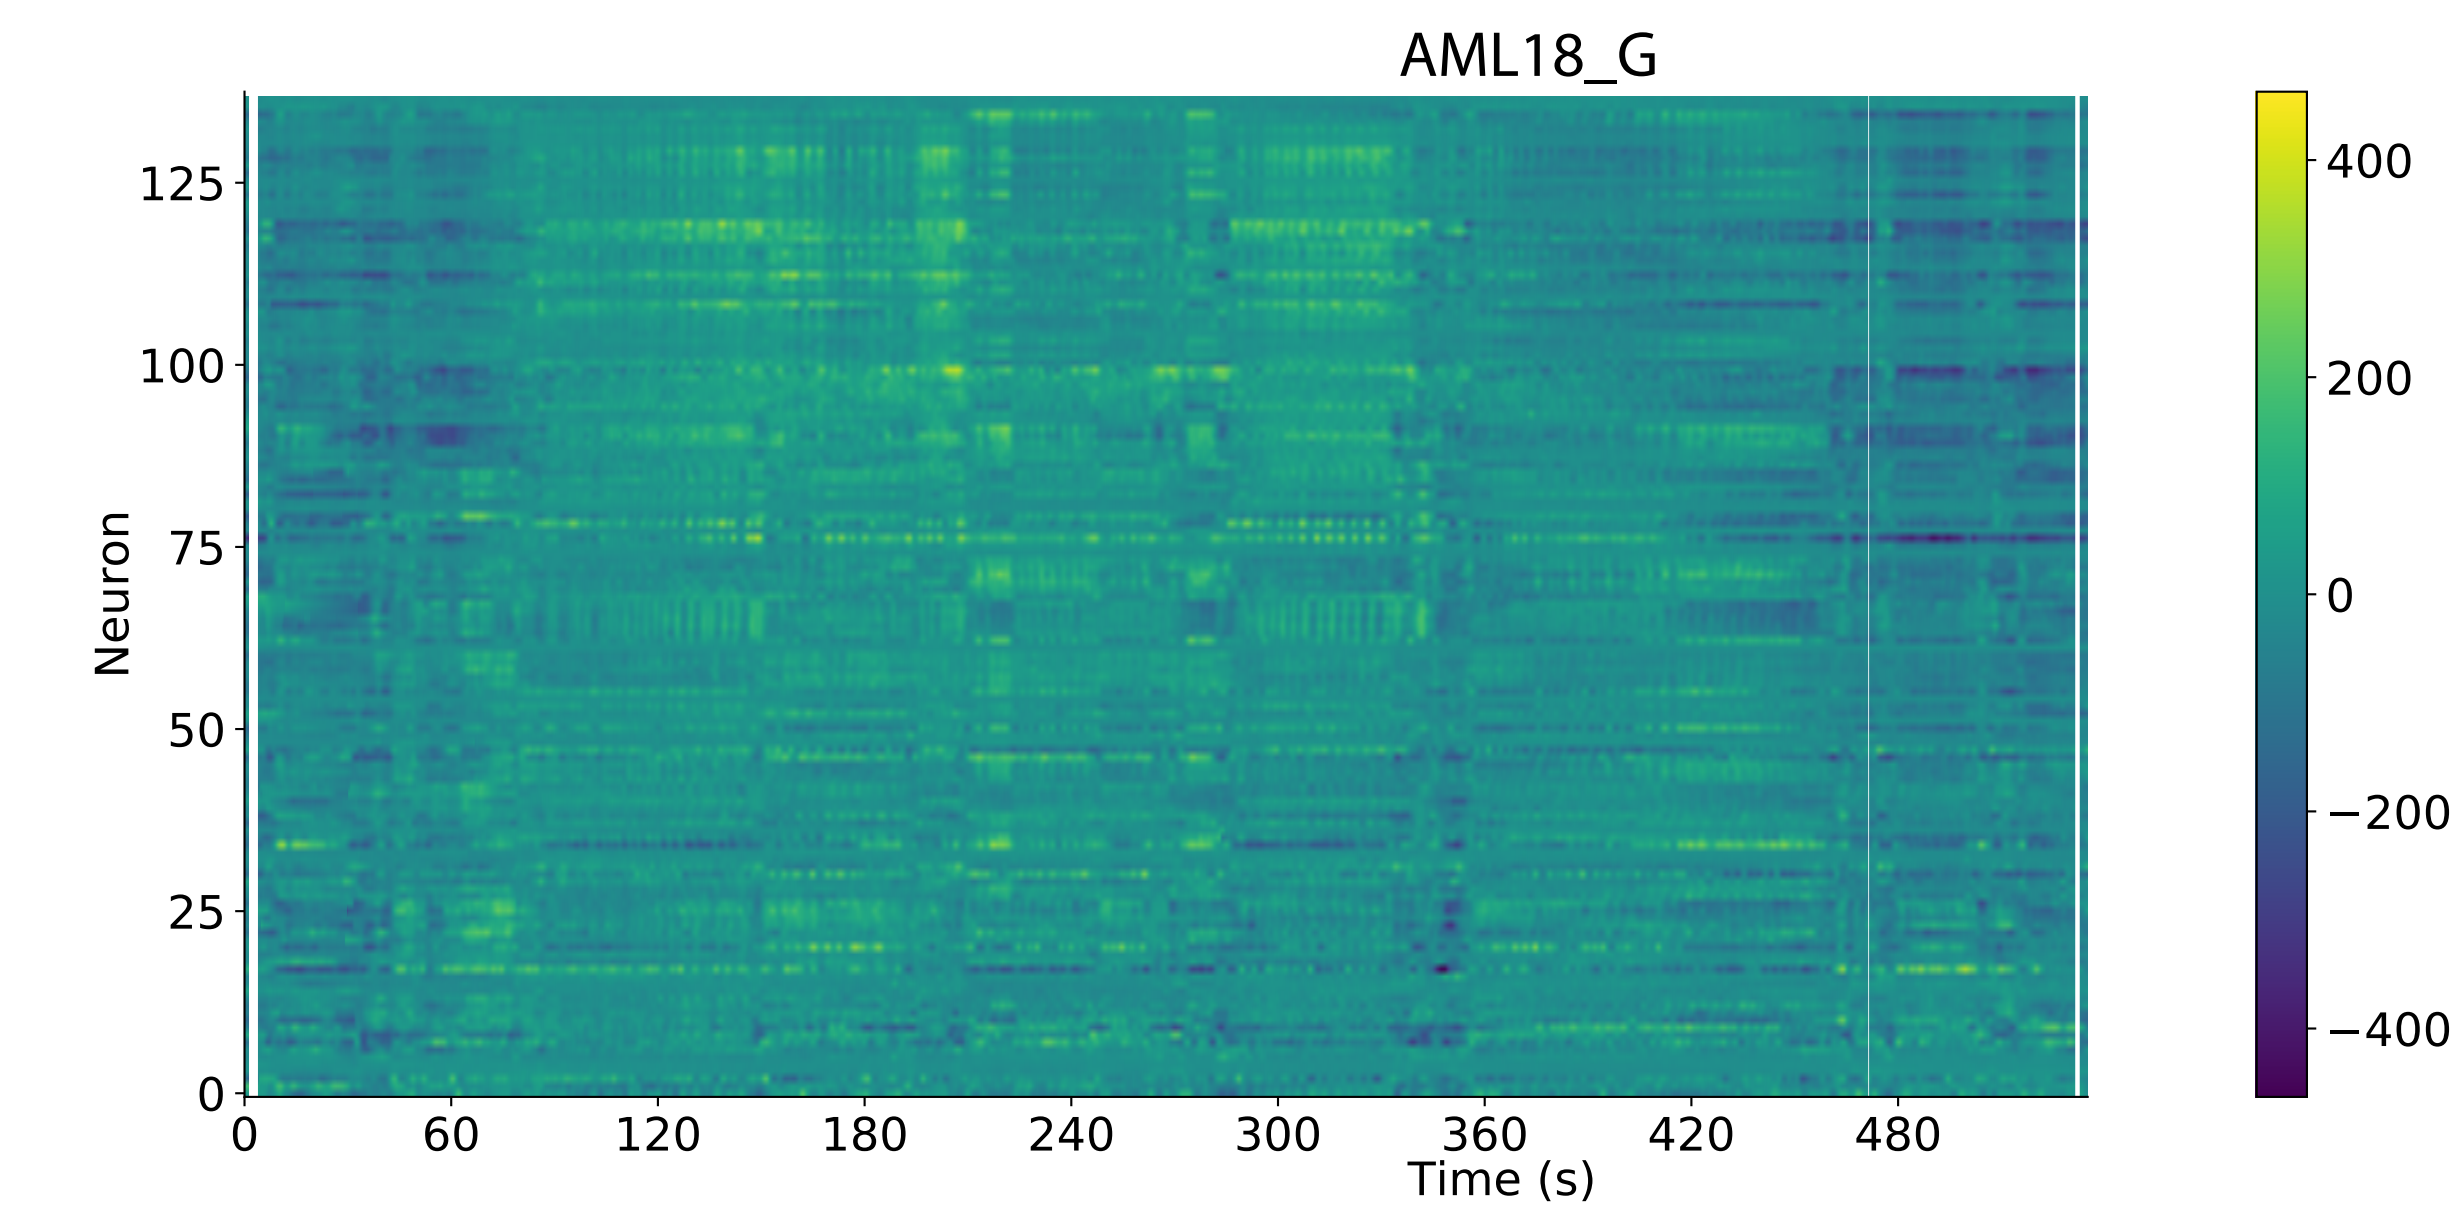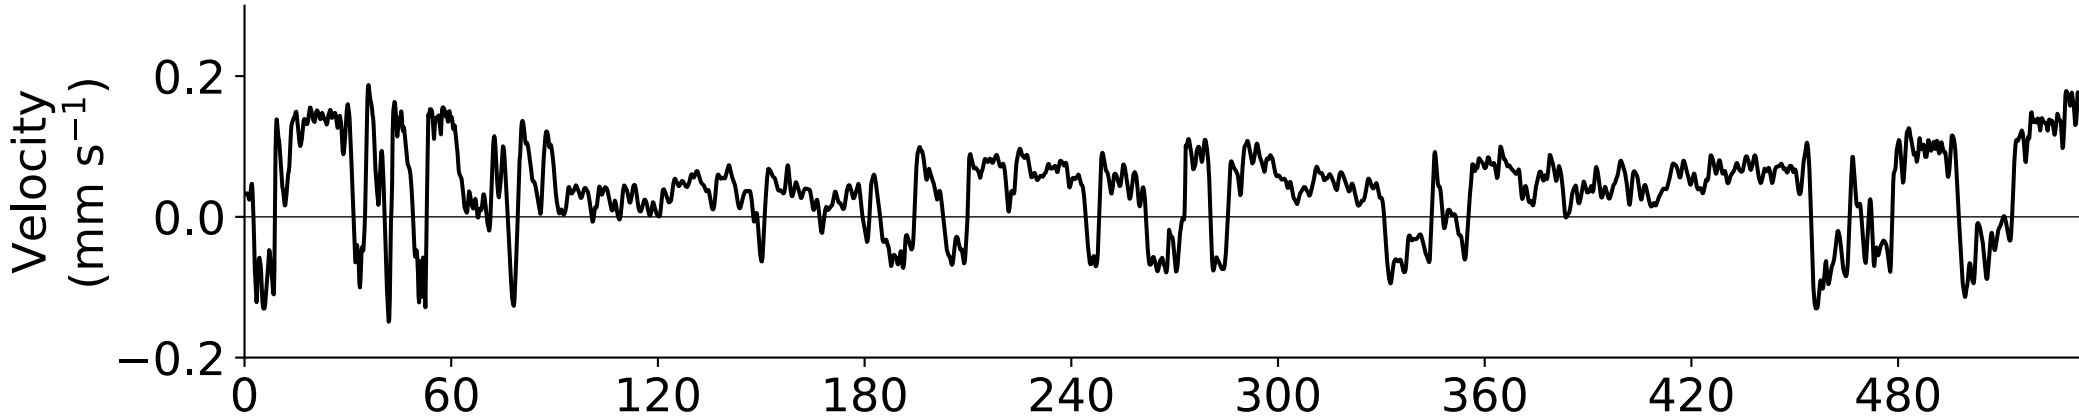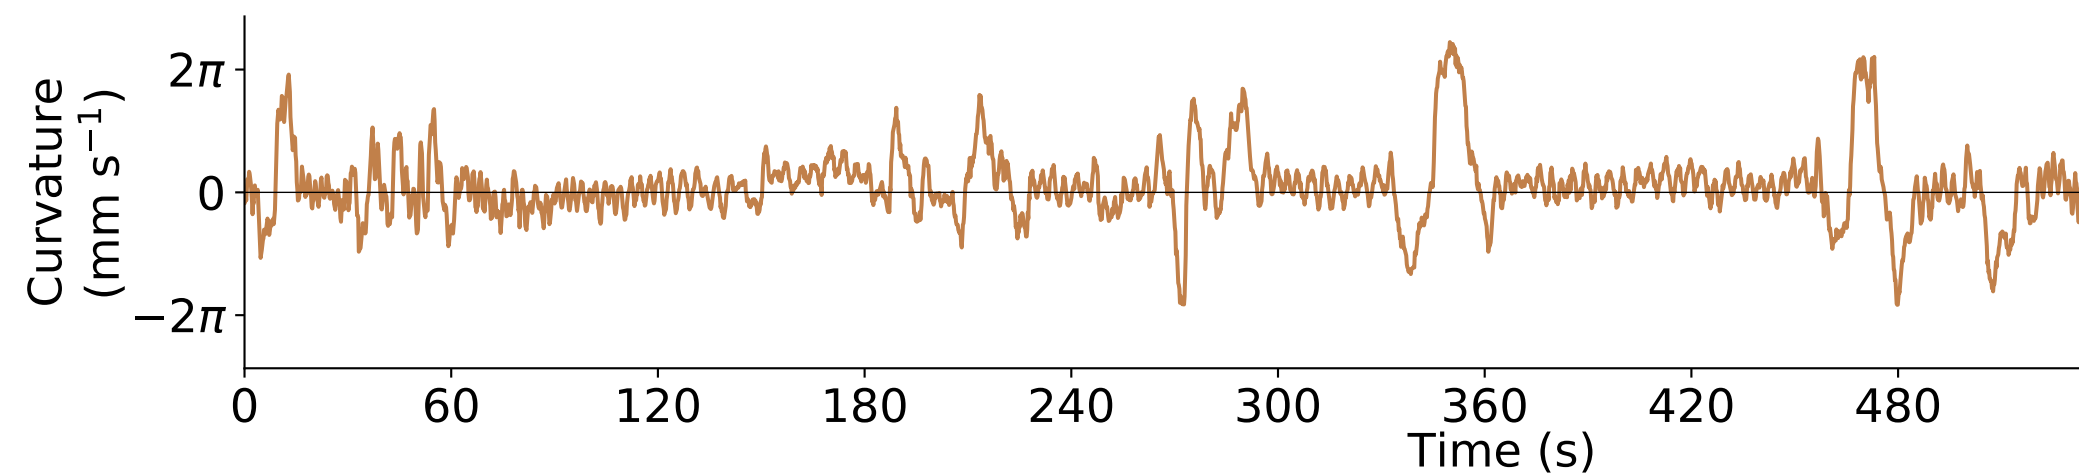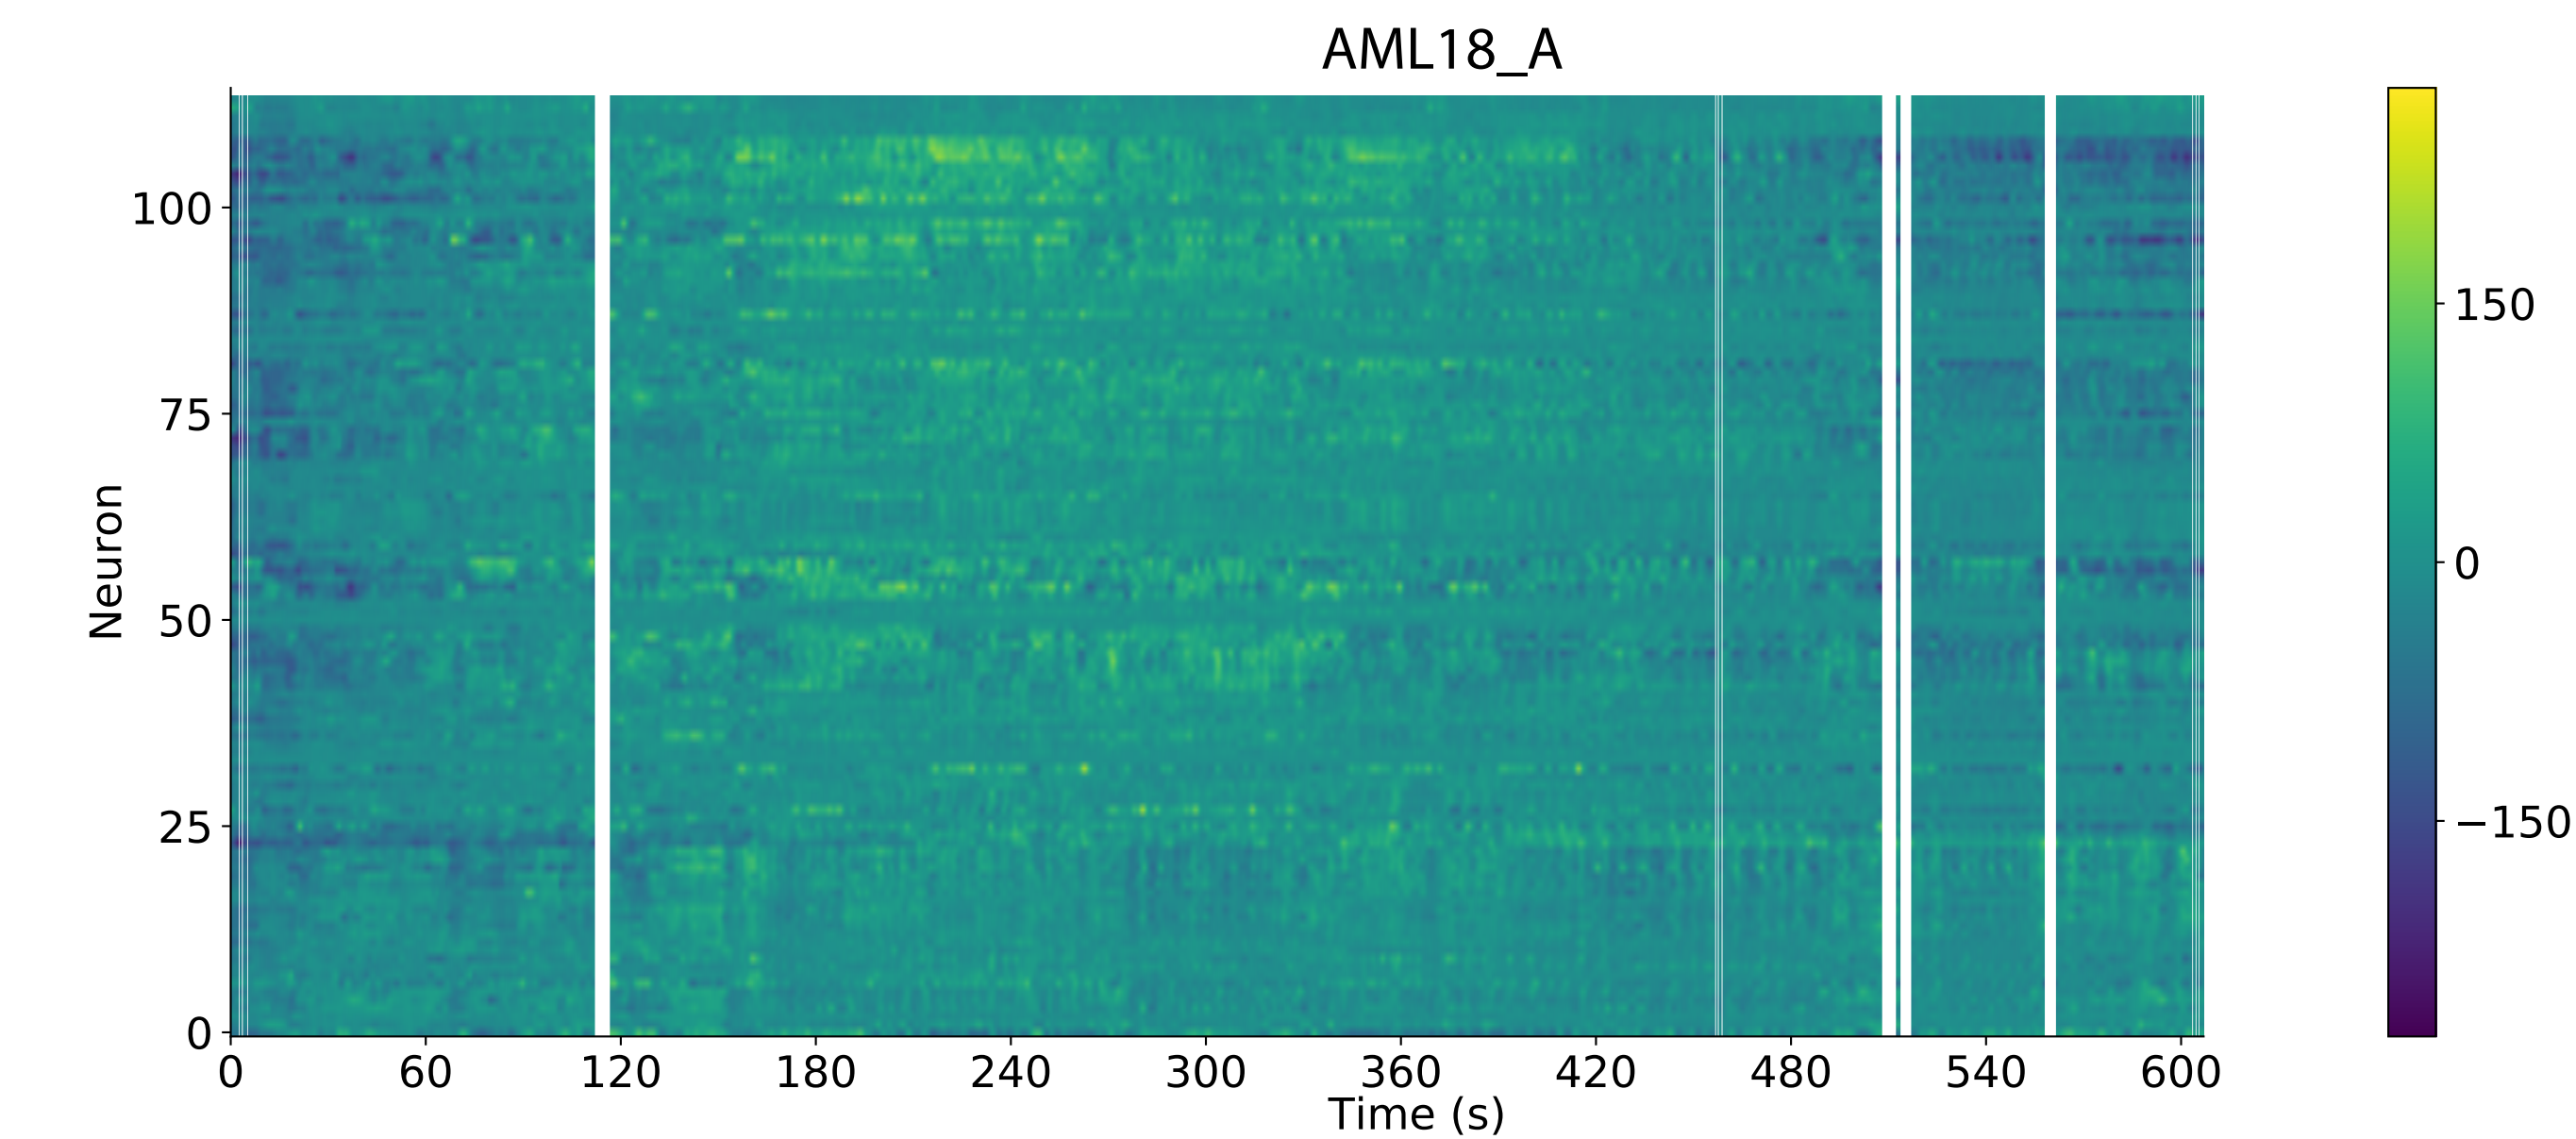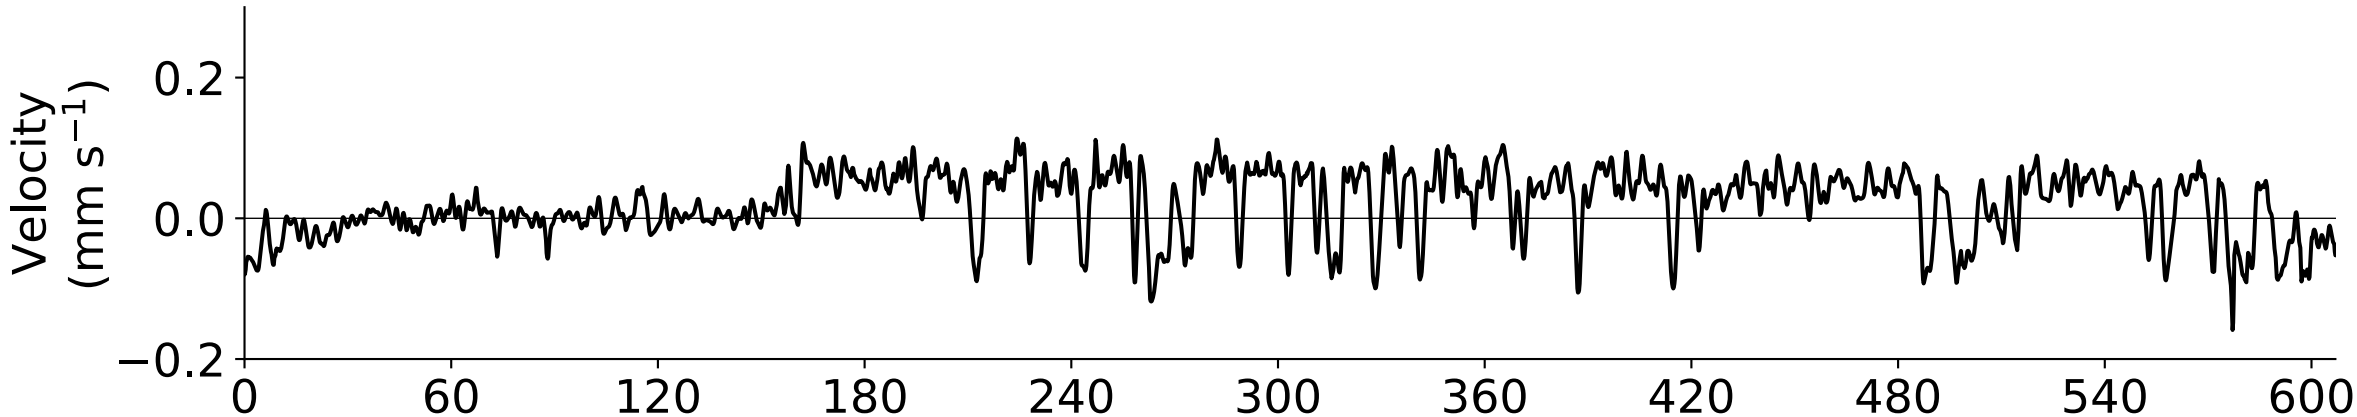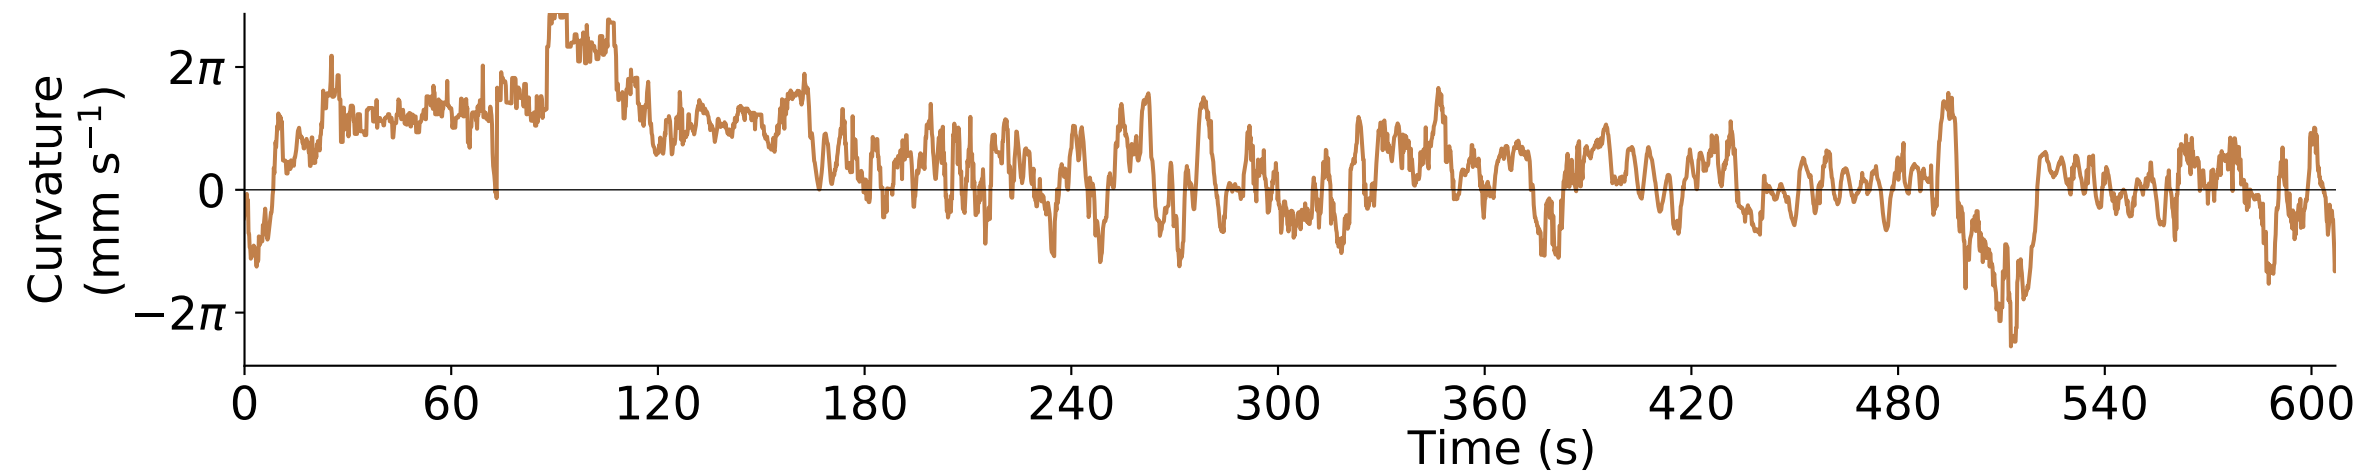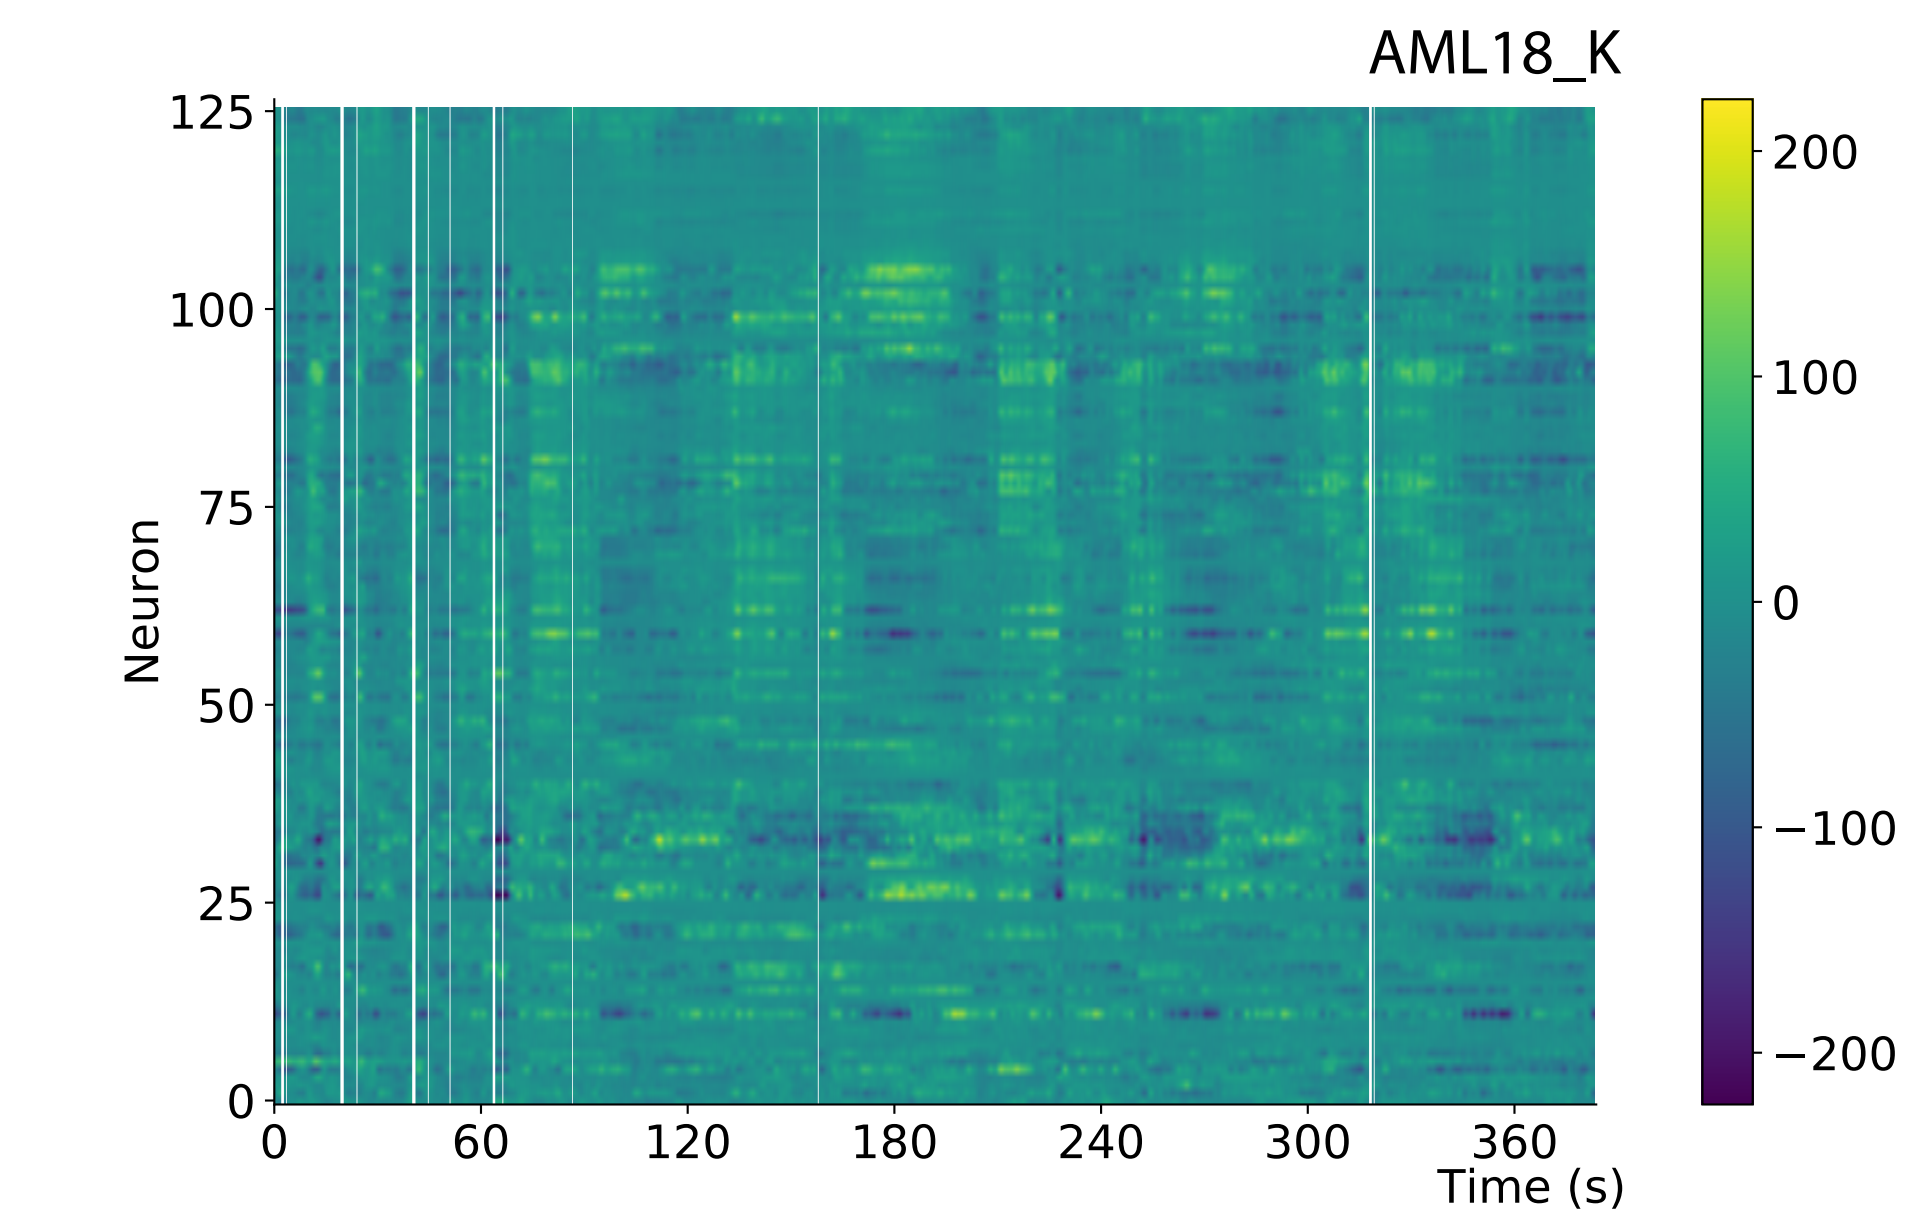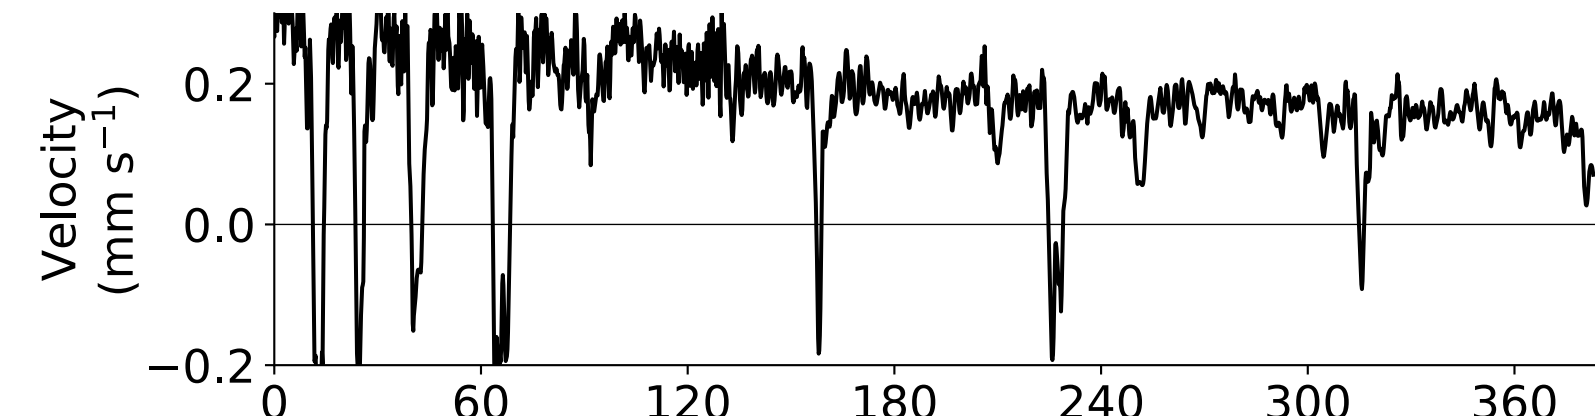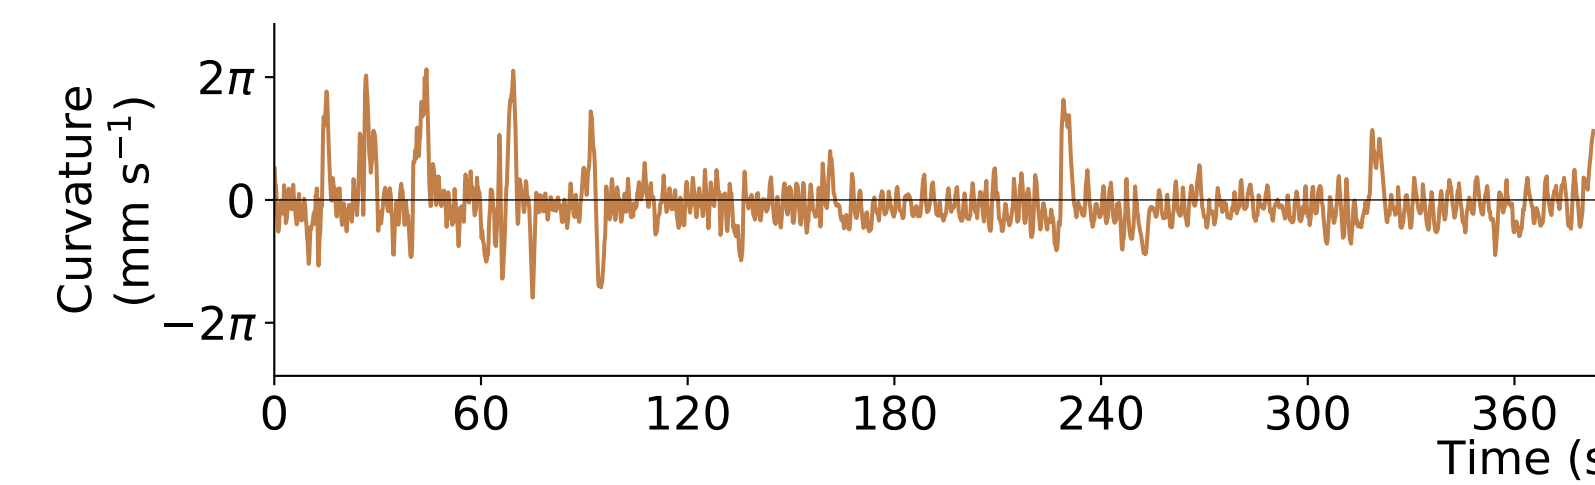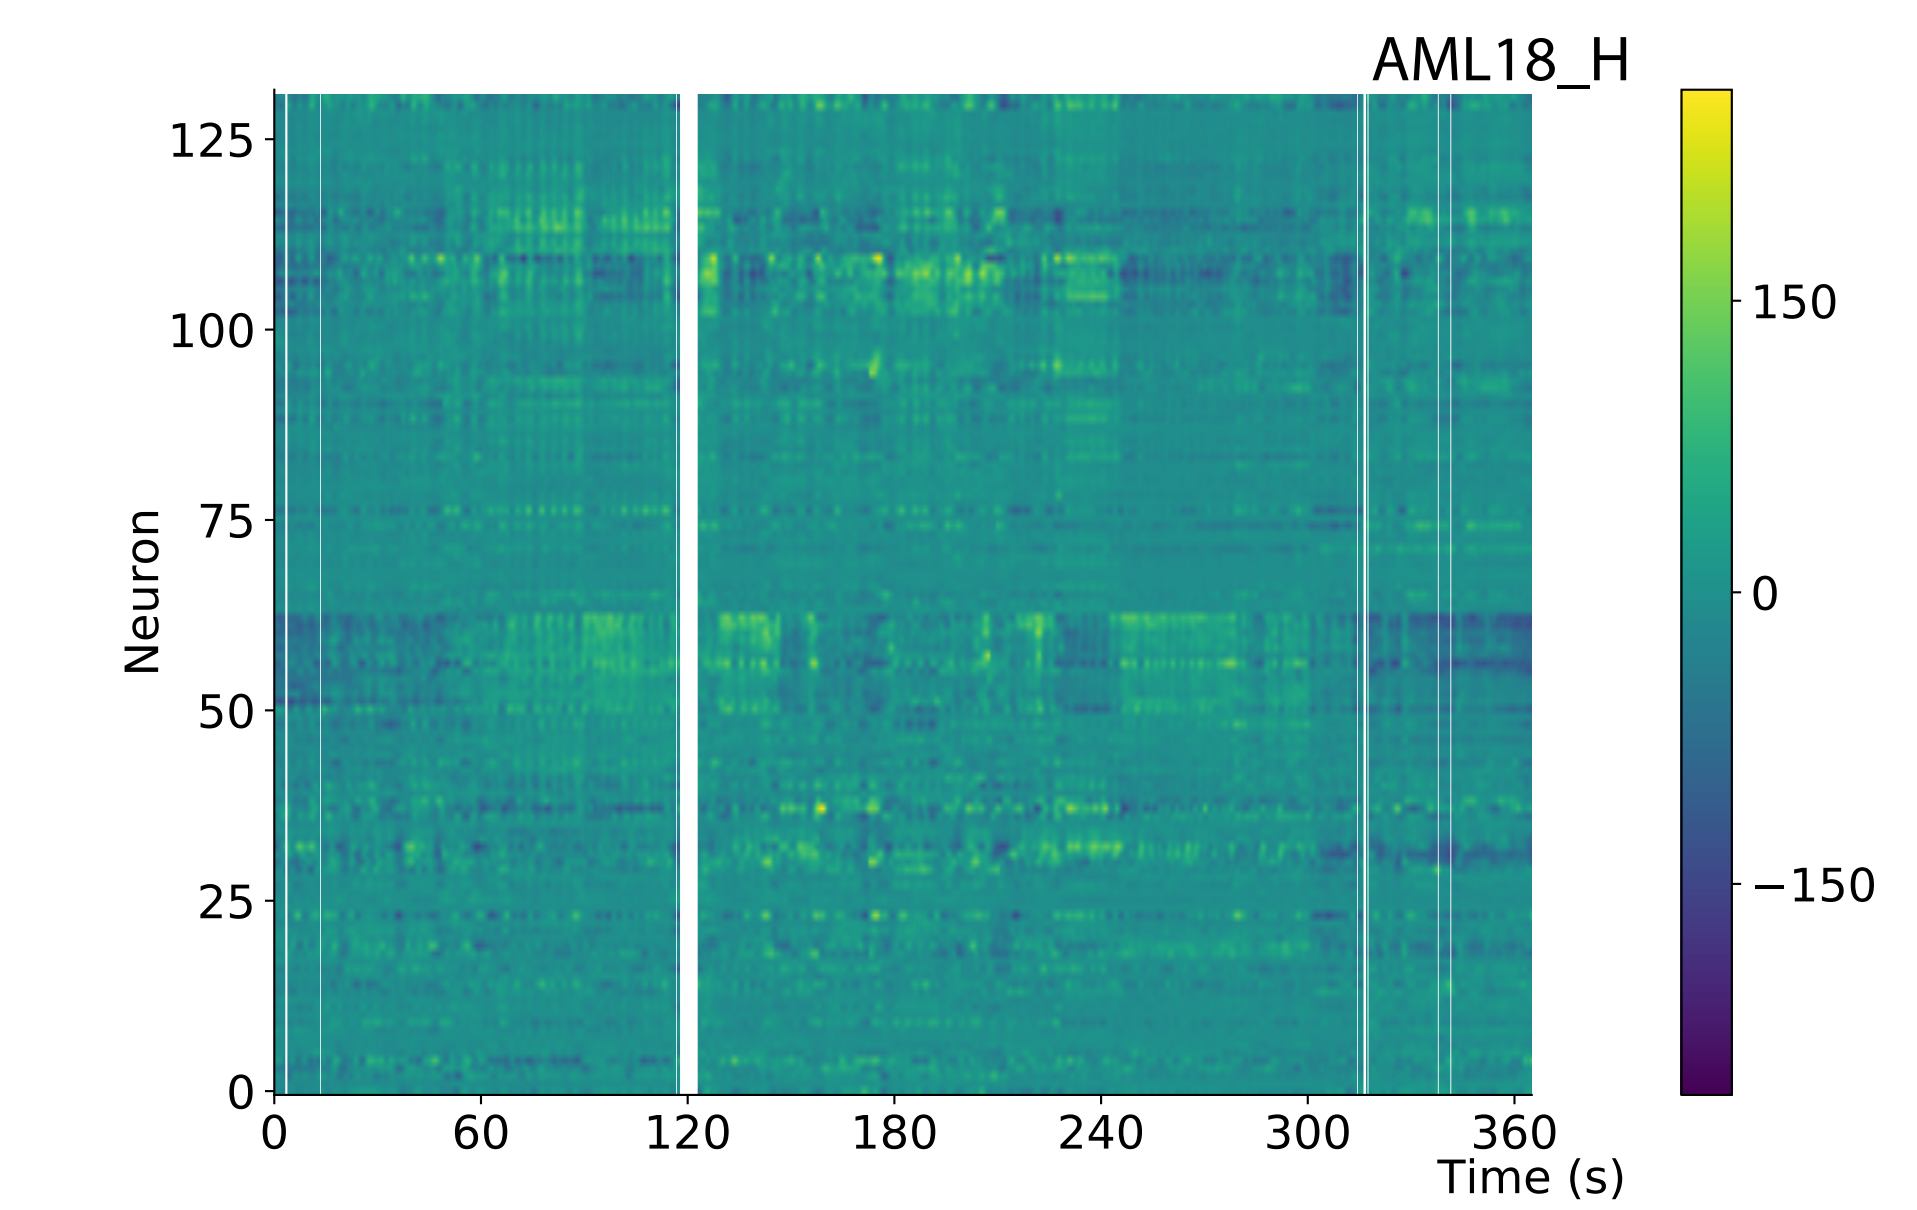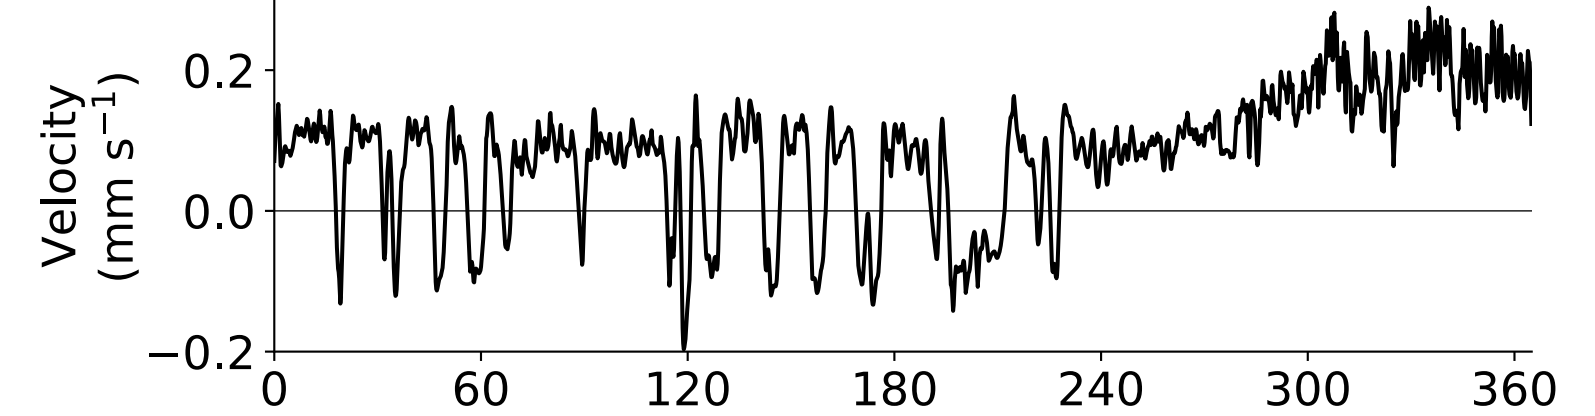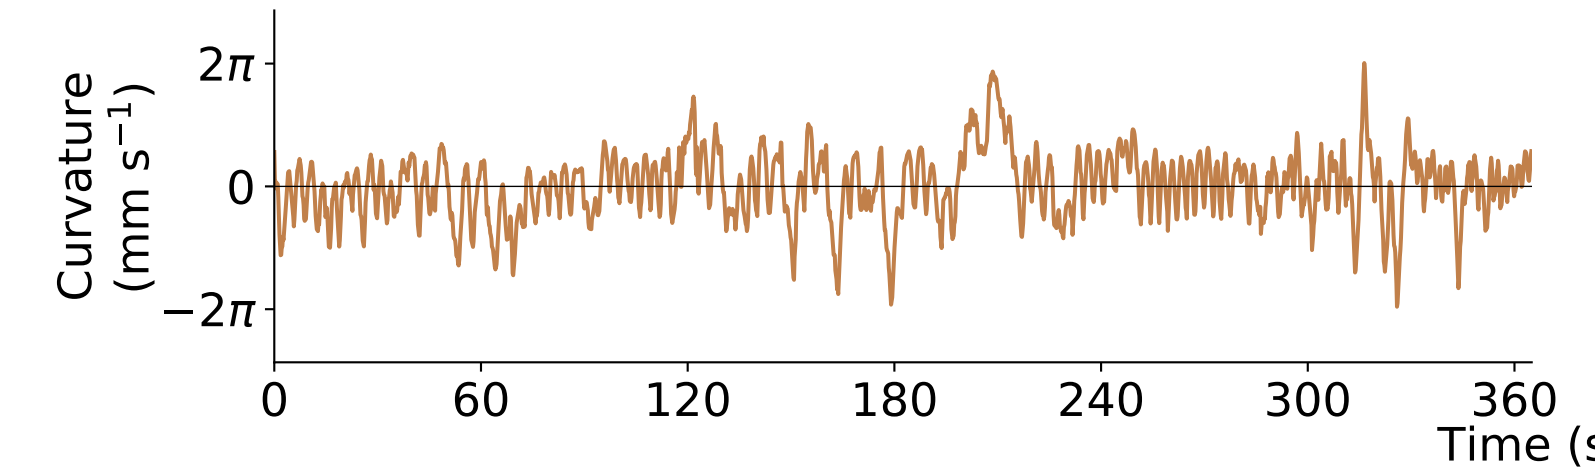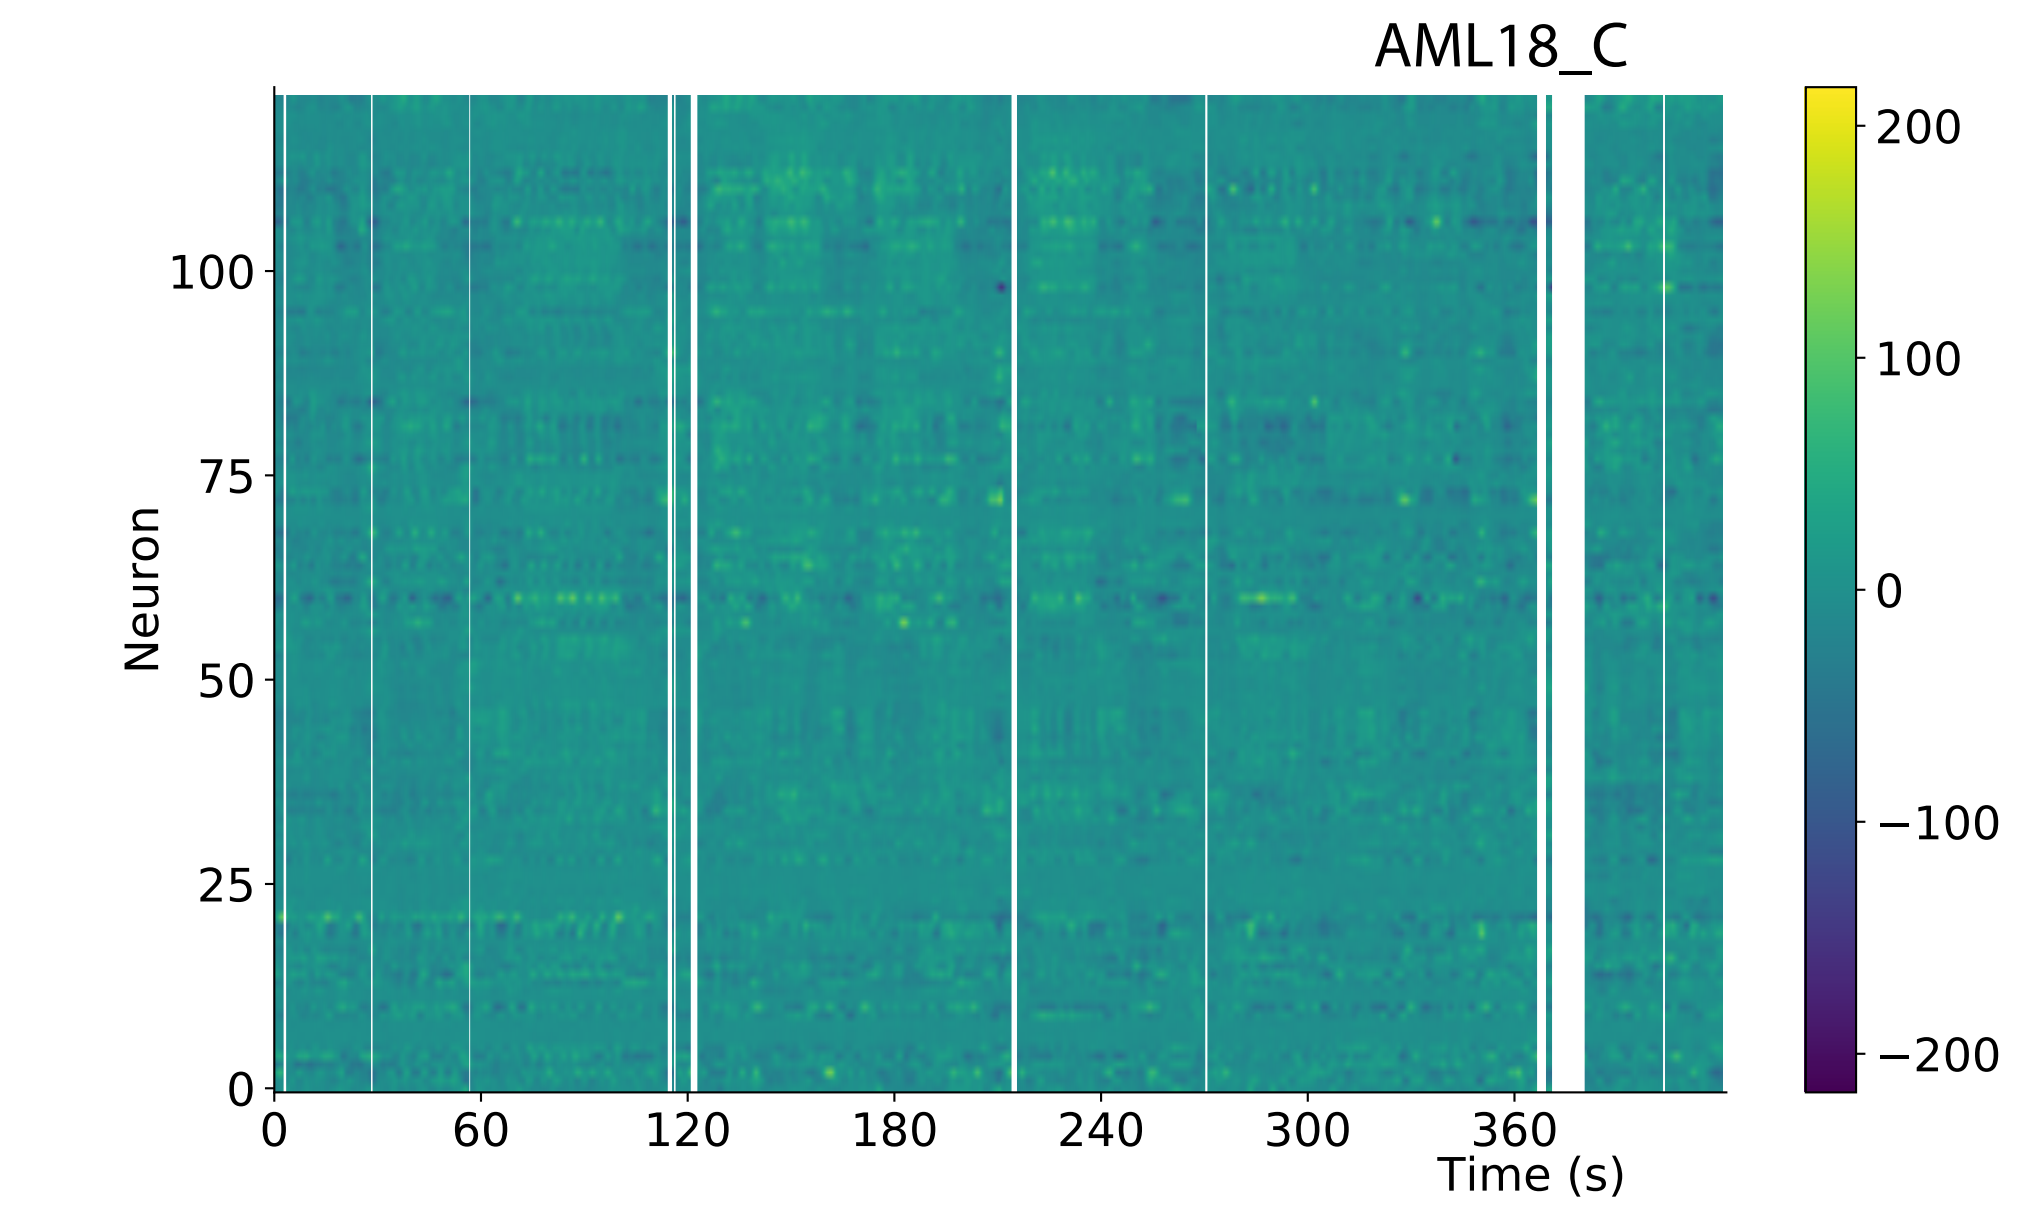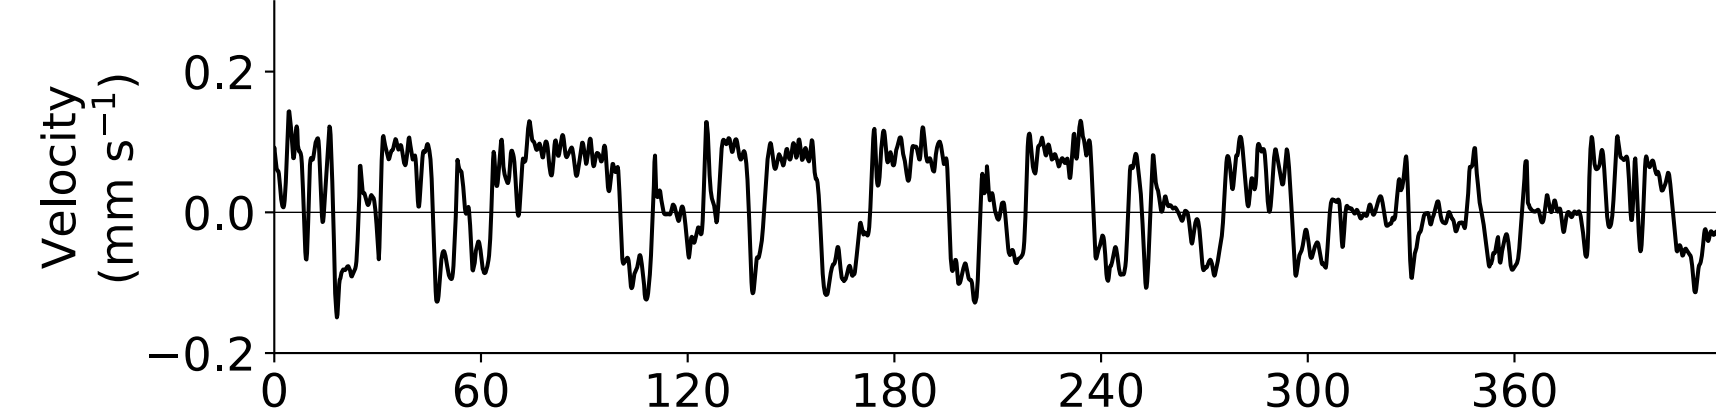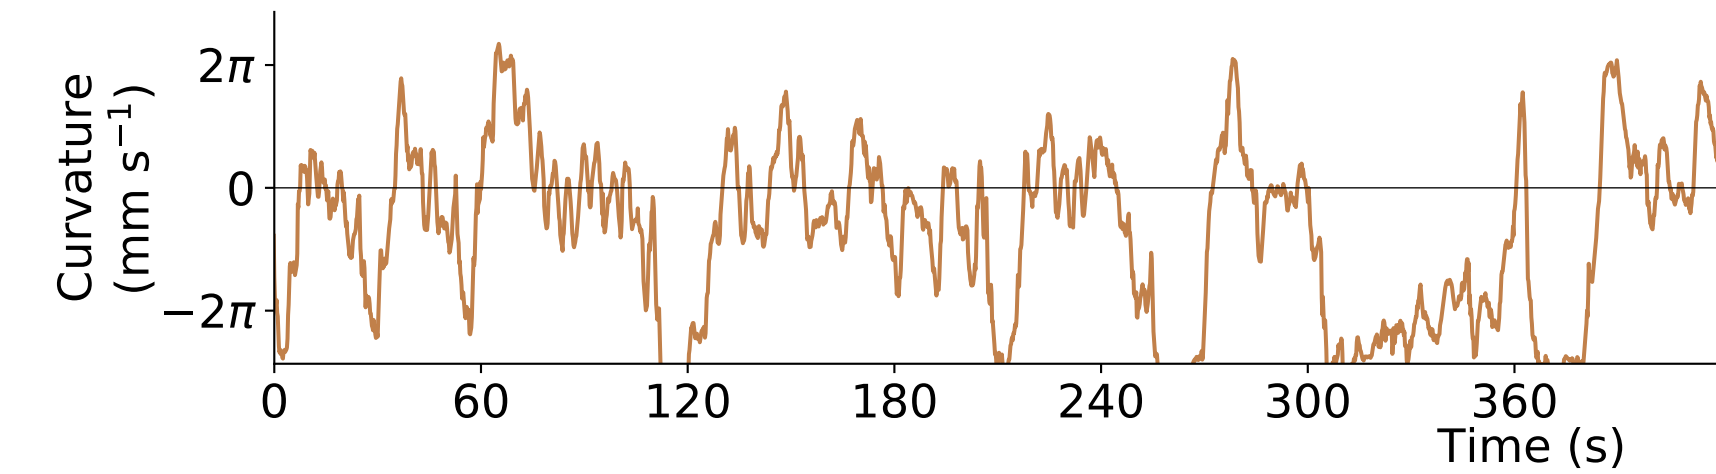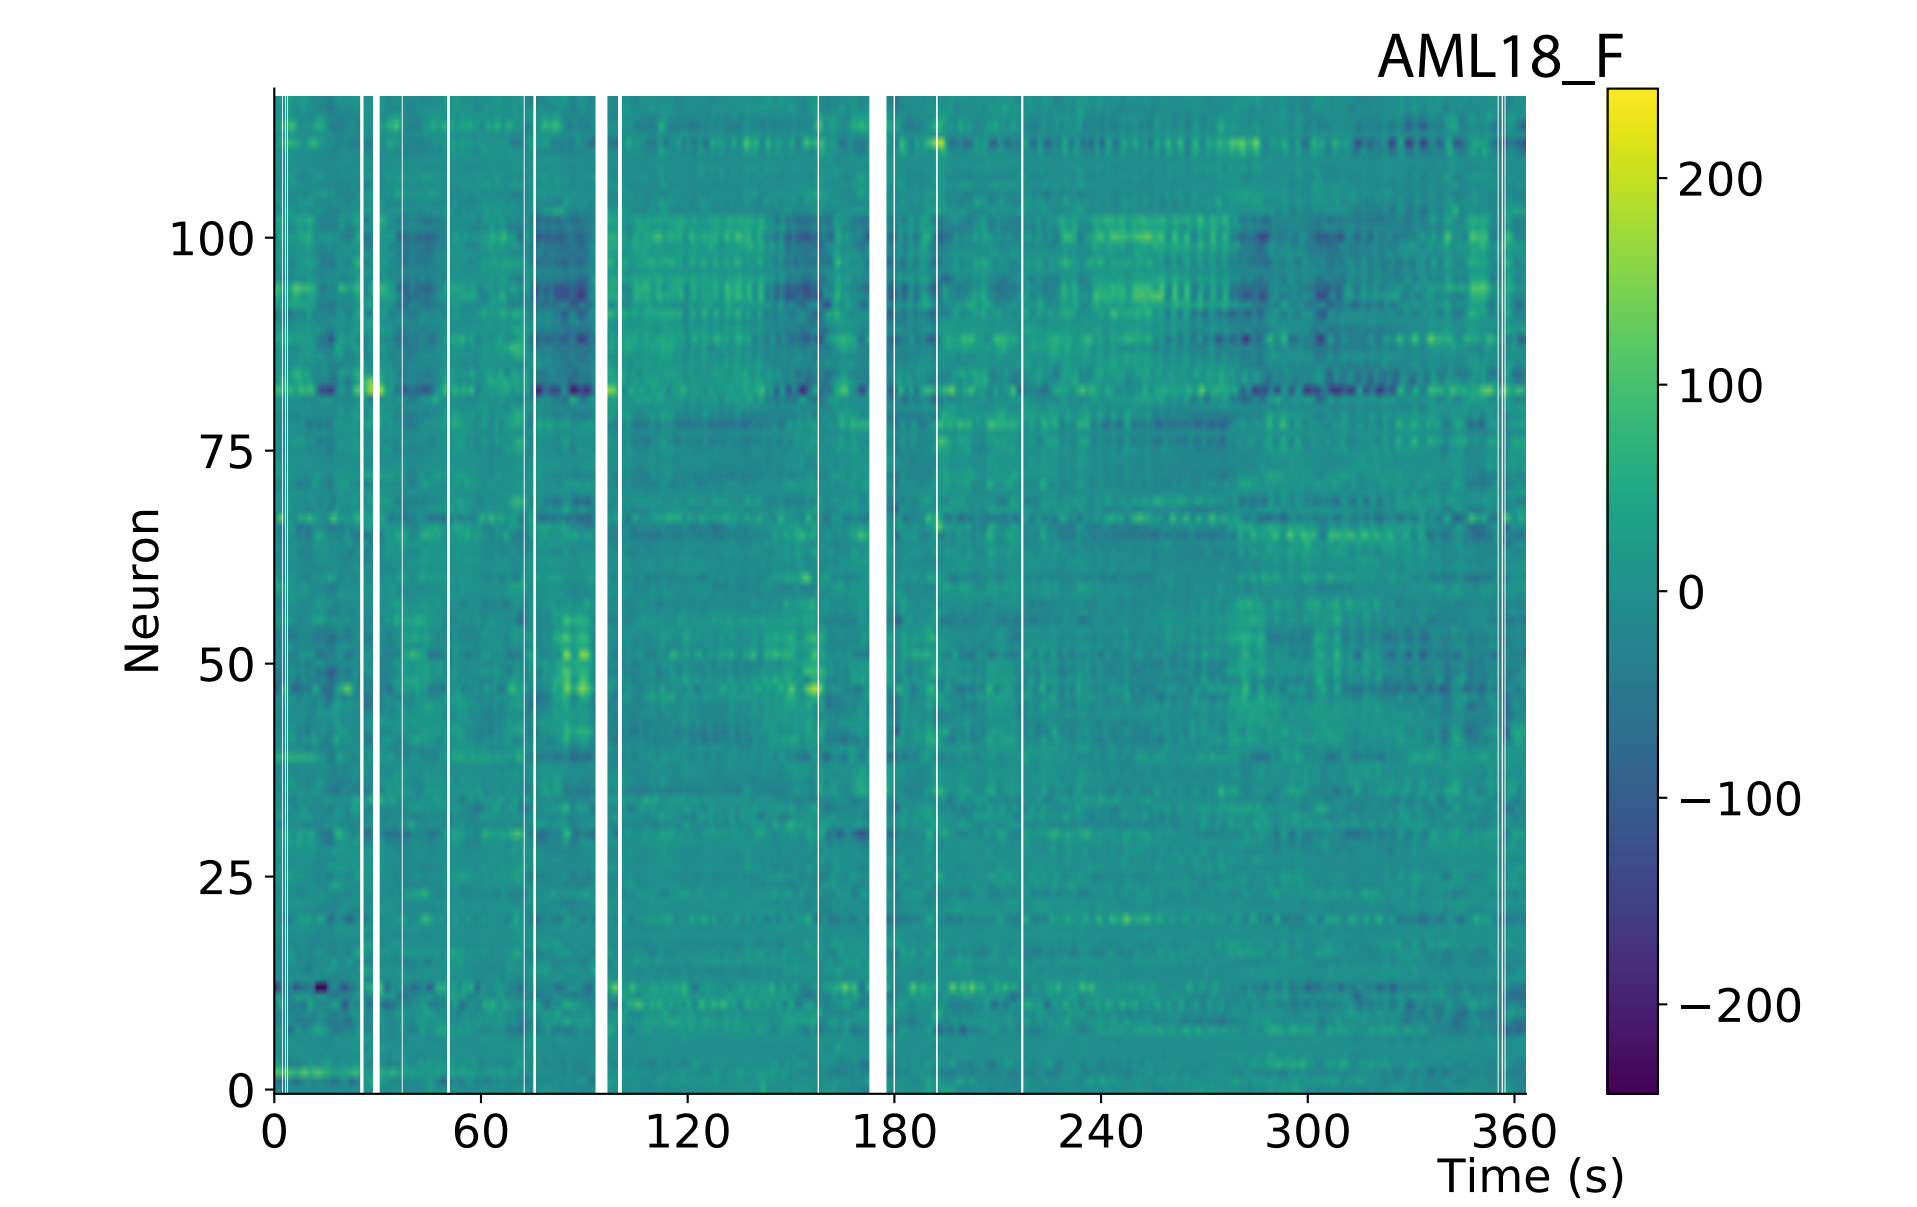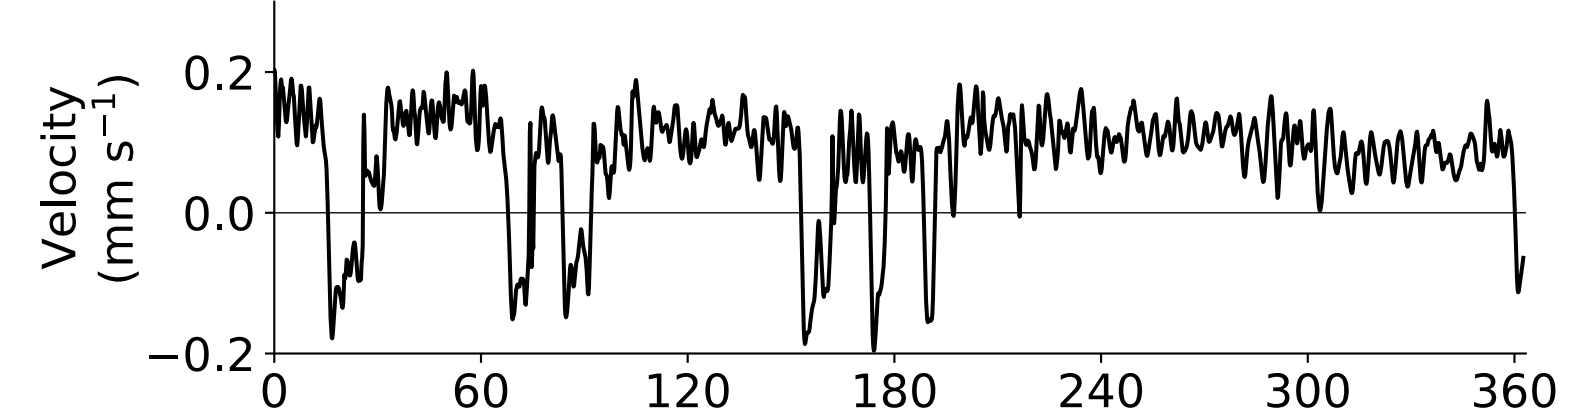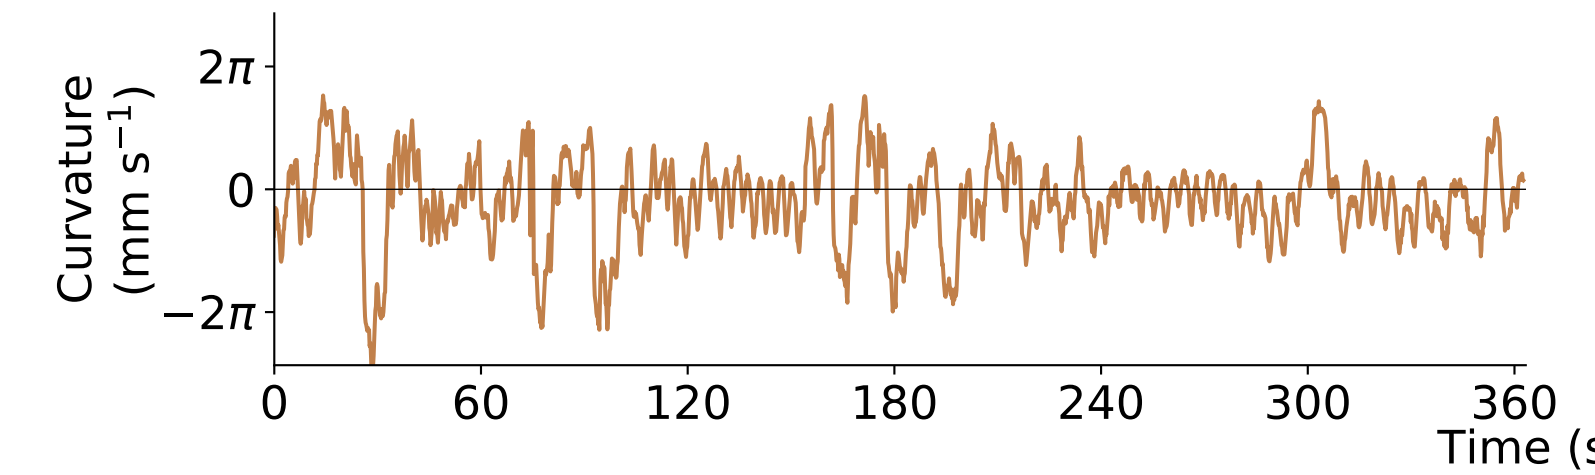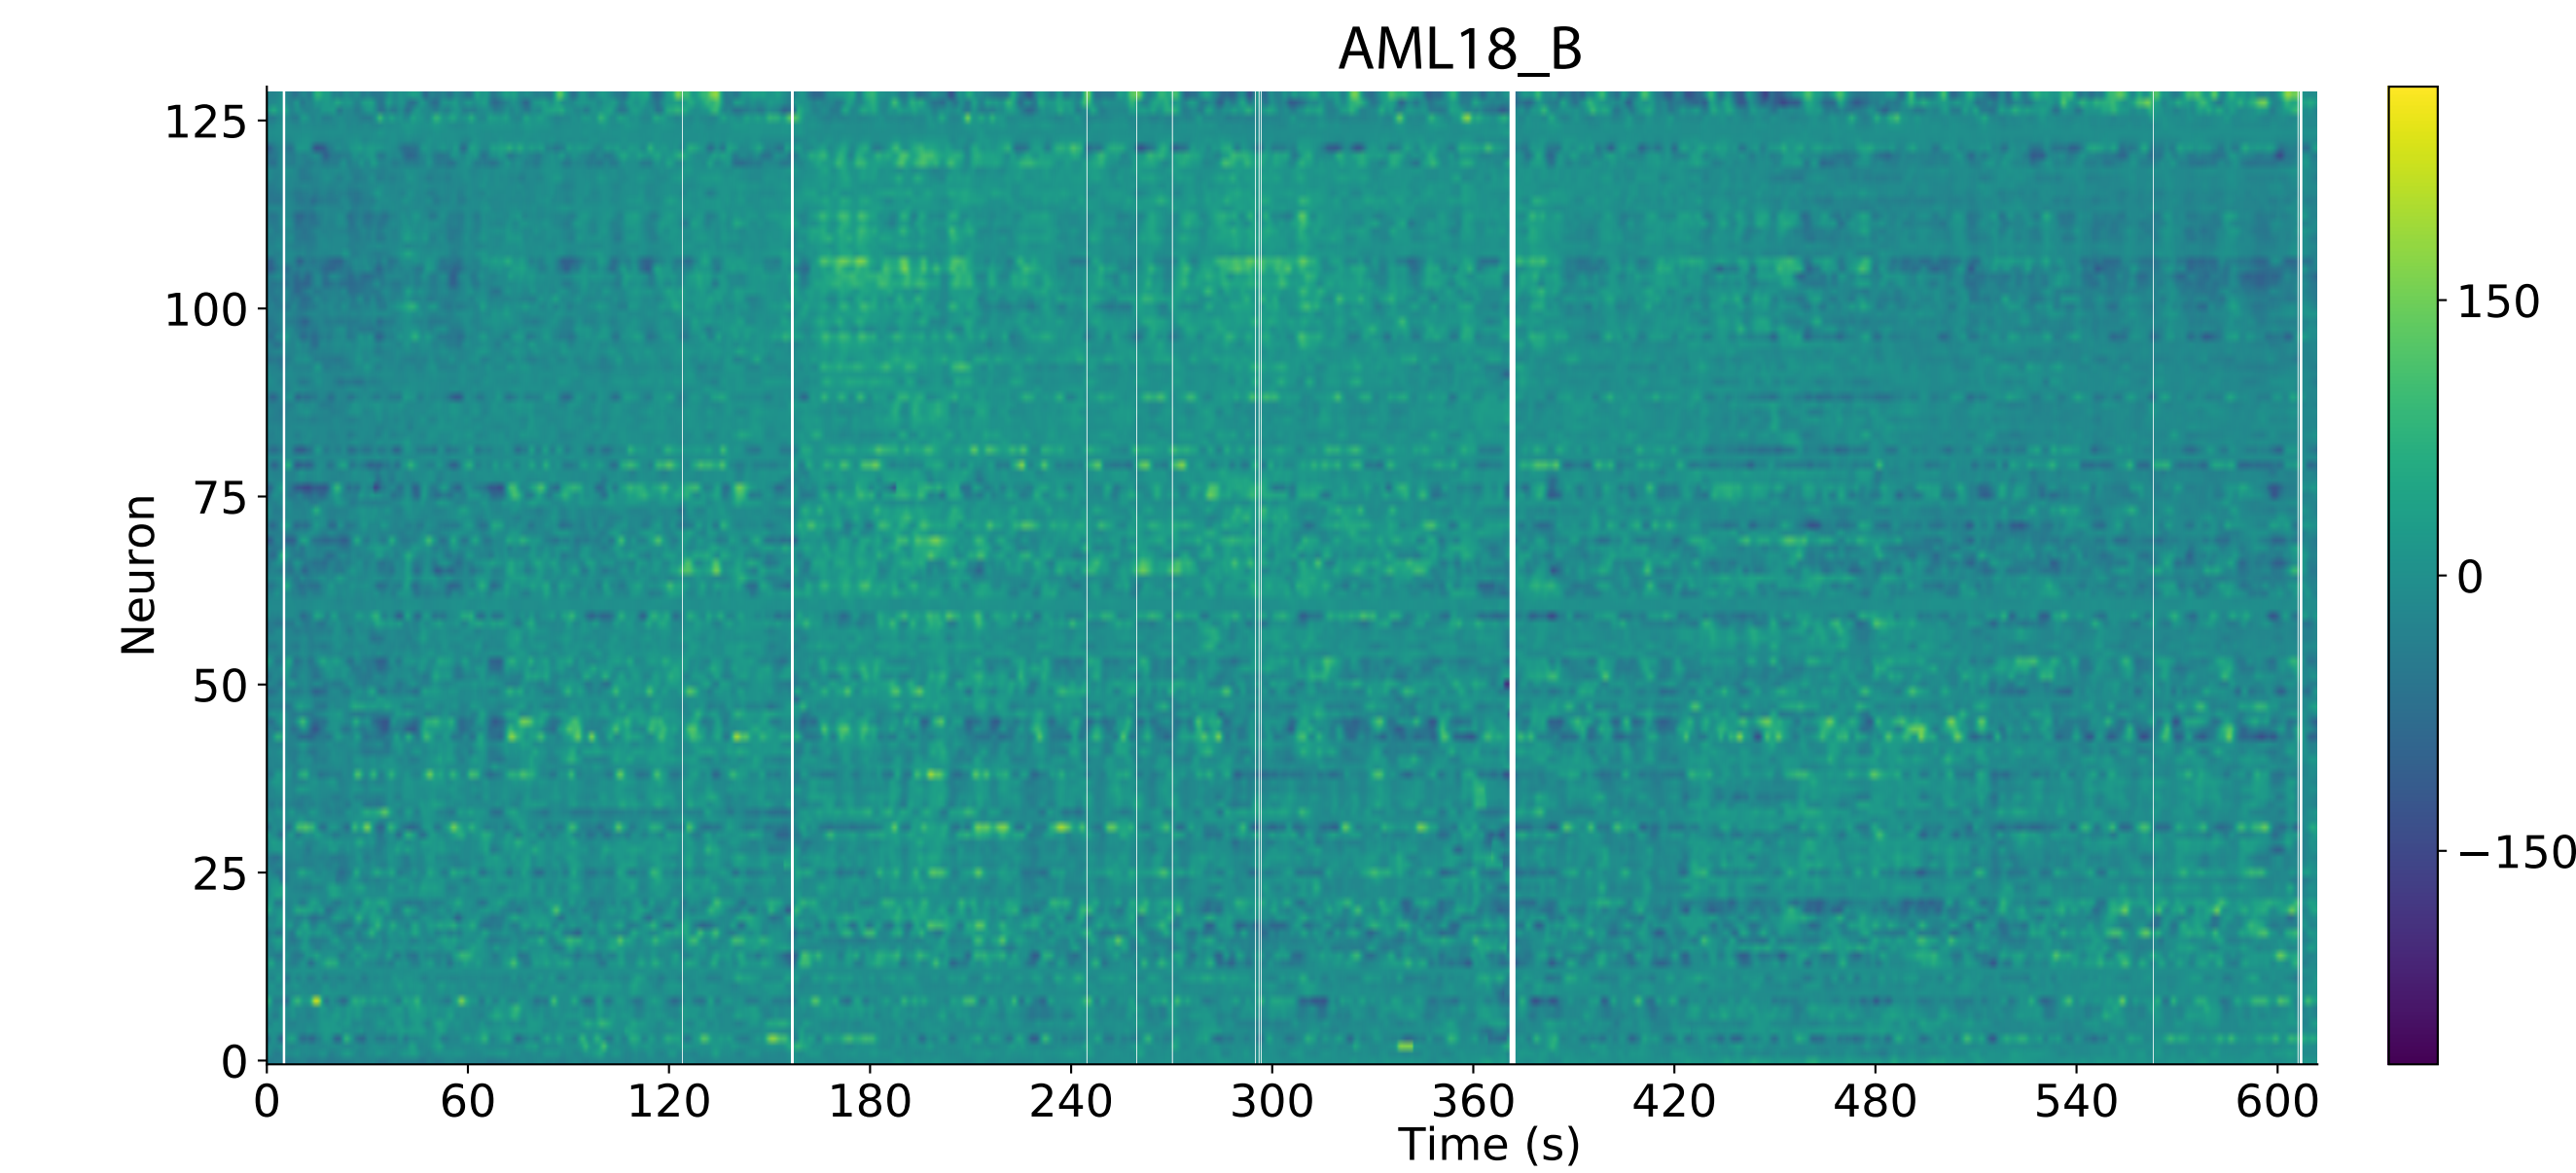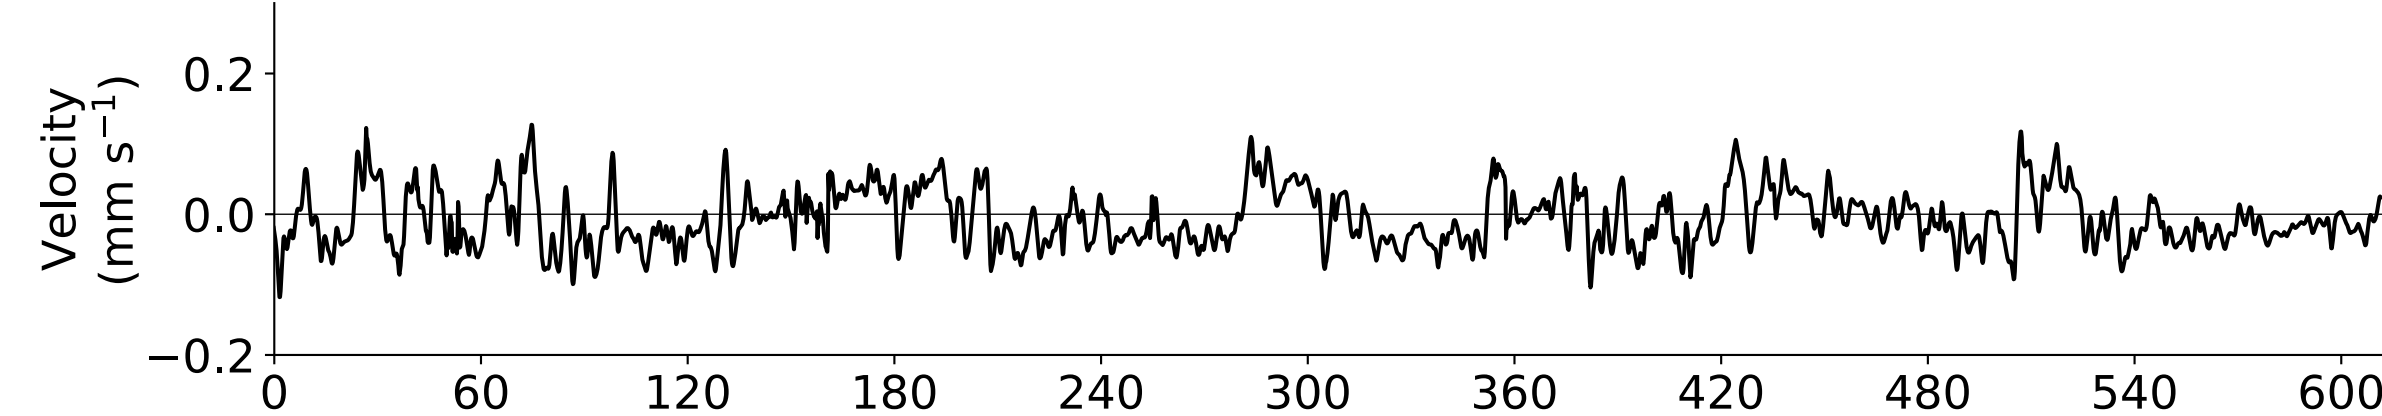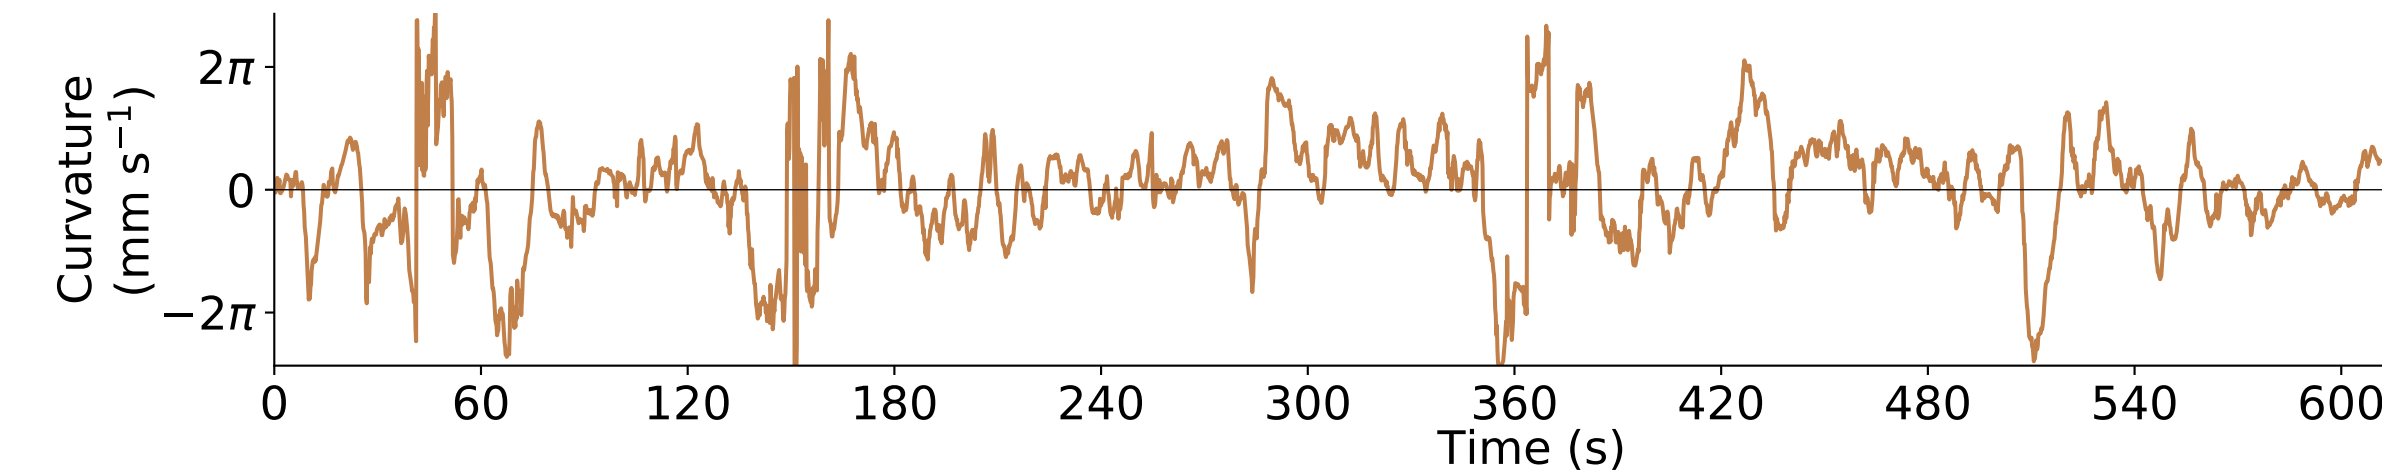

Supplement: supp [file elife-66135-supp-v1.zip]
